# Supplementary material
Source: MDPI journal article supplement (https://www.mdpi.com/2227-9717/7/2/75)
Supplement: s1 [file s1]

# Supplementary Materials: Incremental parameter estimation under rank-deficient measurement conditions – Supplementary information

Kris Villez <sup>1,2\*</sup>, Julien Billeter <sup>2</sup> and Dominique Bonvin <sup>2</sup>

## 1 A. Efficient Model Identification (EMI) package

2 The attached Zip file includes all code to reproduce our results with Matlab R2017b.

## 3 B. Simulation study – Additional results

### 4 B.1. Scenario B

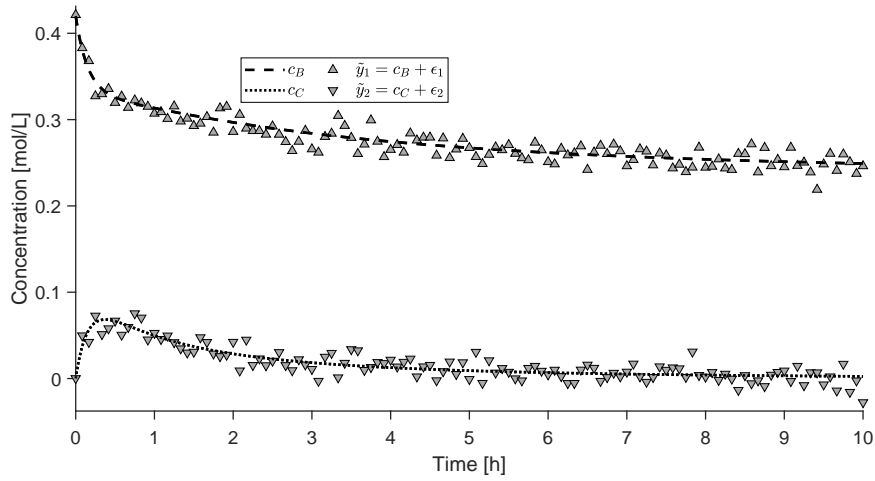

{fig:scenarioB}

Figure S1. Scenario B – Simulation. Noise-free and noisy measurements as a function of time.

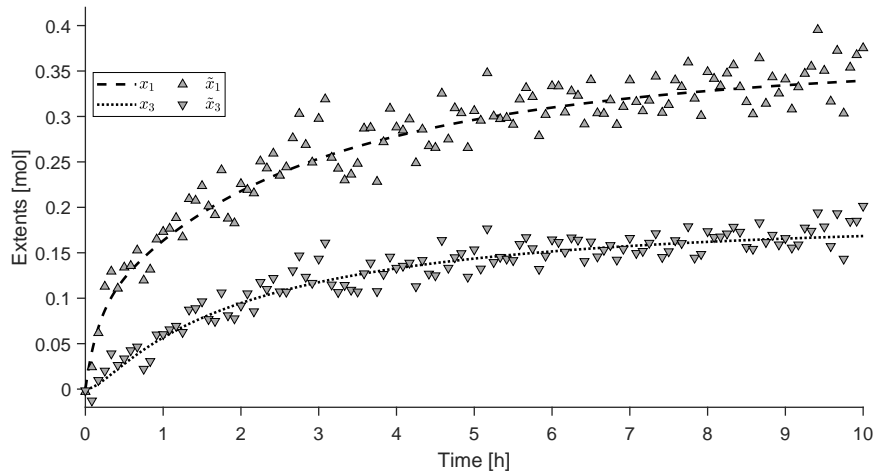

{fig:scenarioB}

Figure S2. Scenario B – Extent computation. Observable extents ( $x_1, x_3$ ) and their computed equivalents ( $\tilde{x}_1, \tilde{x}_3$ ).

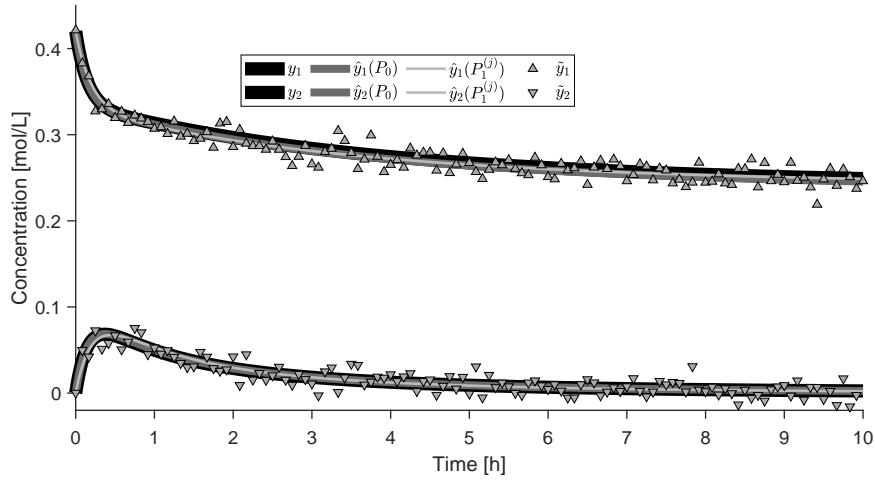

{fig:scenarioB}

**Figure S3. Scenario B – Parameter estimation.** Measured concentrations and simulated profiles obtained with (i) true parameters, (ii) simultaneous parameter estimation  $P_0$ , and (iii) incremental parameter estimation  $P_1^{(1)}$  and  $P_1^{(2)}$ . The produced simulation results exhibit strong overlap, meaning that the identified models closely approximate the ground truth model.

## 5 B.2. Scenario C

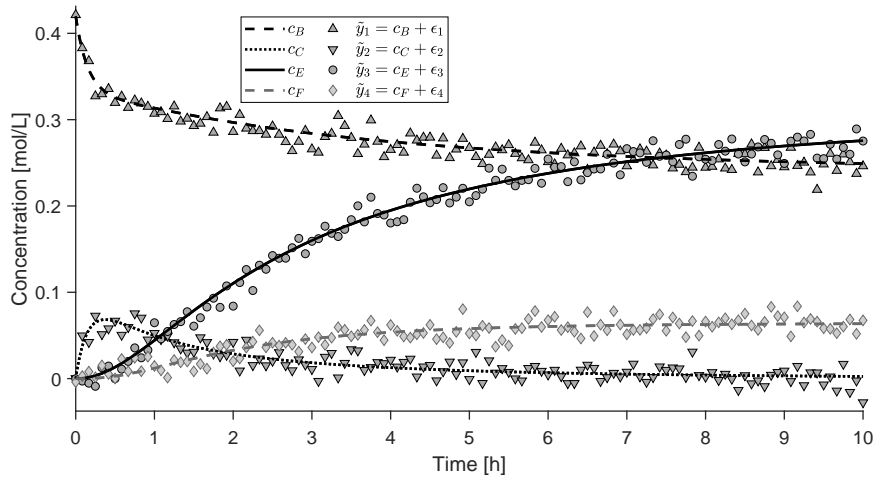

{fig:scenarioC}

**Figure S4. Scenario C – Simulation.** Noise-free and noisy measurements as a function of time.

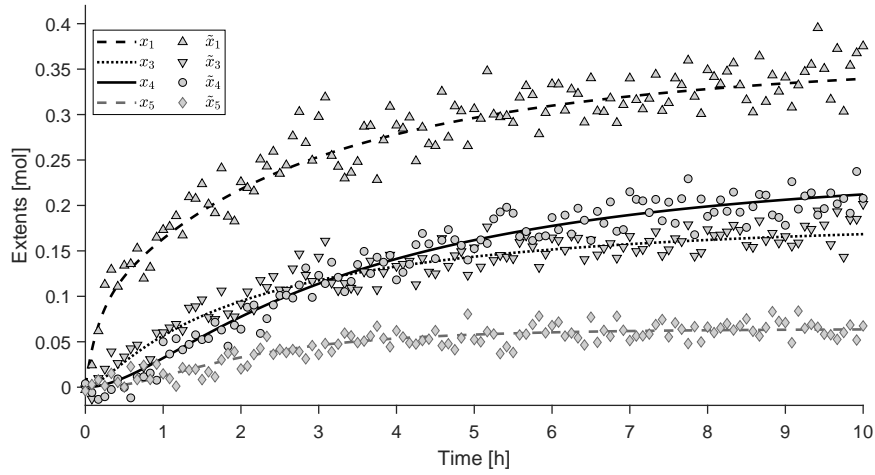

{fig:scenarioC

**Figure S5. Scenario C – Extent computation.** Observable extents ( $x_1, x_3, x_4, x_5$ ) and their computed equivalents ( $\tilde{x}_1, \tilde{x}_3, \tilde{x}_4, \tilde{x}_5$ ).

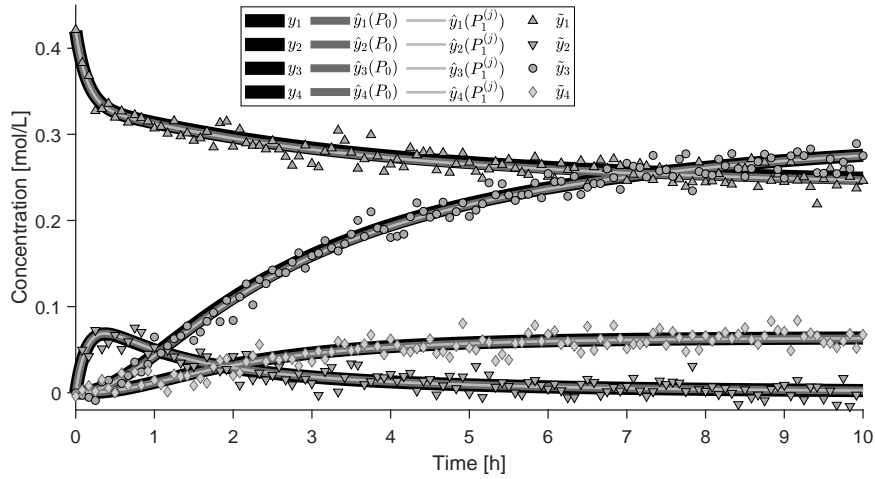

{fig:scenarioC

**Figure S6. Scenario C – Parameter estimation.** Measured concentrations and simulated profiles obtained with (i) true parameters, (ii) simultaneous parameter estimation  $P_0$ , and (iii) incremental parameter estimation  $P_1^{(1)}$  and  $P_1^{(2)}$ . The produced simulation results exhibit strong overlap, meaning that the identified models closely approximate the ground truth model.

6 *B.3. Scenario D*

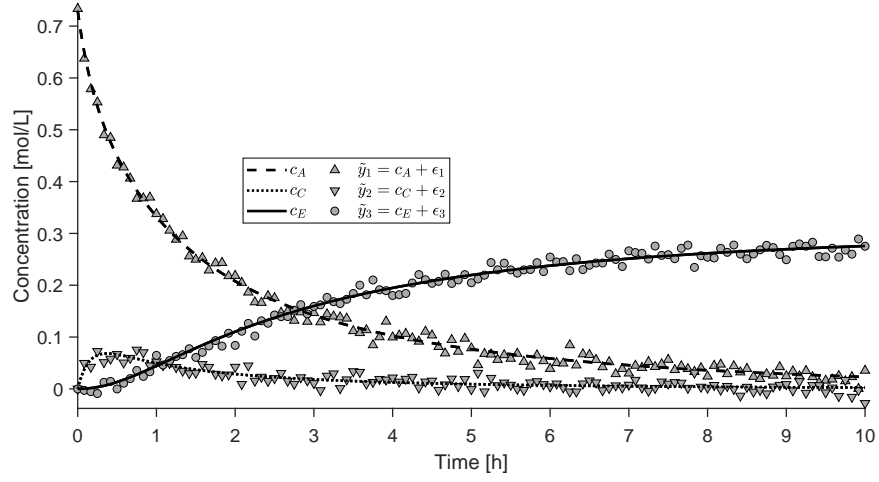

{fig:scenarioD}

**Figure S7. Scenario D – Simulation.** Noise-free and noisy measurements as a function of time.

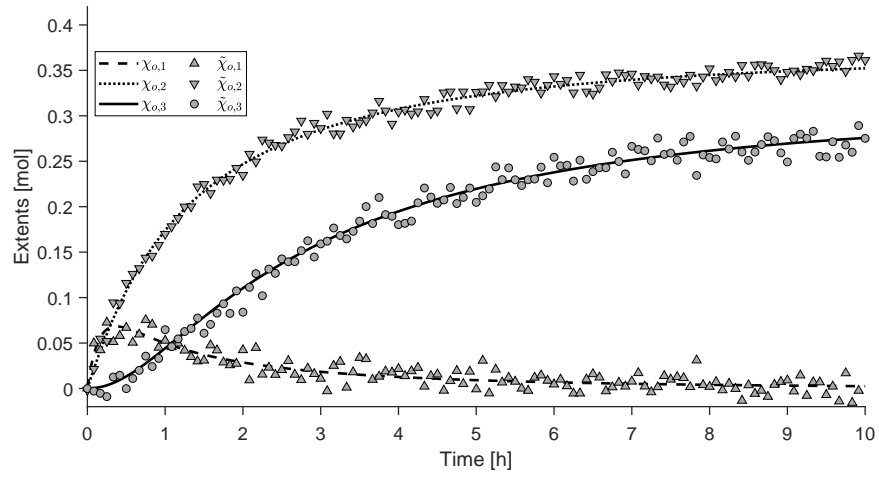

{fig:scenarioD}

**Figure S8. Scenario D – Extent computation.** Observable extent directions ( $\chi_{o,1}$ ,  $\chi_{o,2}$ ,  $\chi_{o,3}$ ) and their computed equivalents ( $\tilde{\chi}_{o,1}$ ,  $\tilde{\chi}_{o,2}$ ,  $\tilde{\chi}_{o,3}$ ).

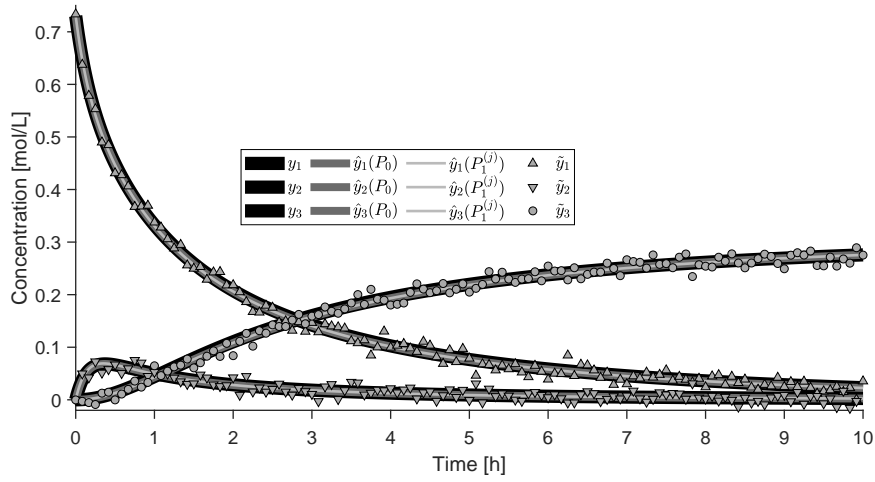

{fig:scenarioD}

**Figure S9. Scenario D – Parameter estimation.** Measured concentrations and simulated profiles obtained with (i) true parameters, (ii) simultaneous parameter estimation  $P_0$ , and (iii) incremental parameter estimation  $P_1^{(1)}$  and  $P_1^{(2)}$ . The produced simulation results exhibit strong overlap, meaning that the identified models closely approximate the ground truth model.

#### 7 B.4. Scenario E

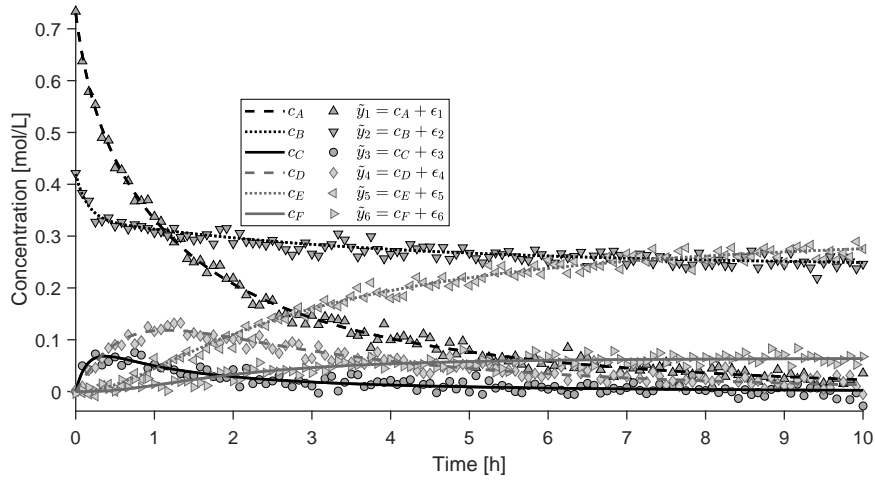

{fig:scenarioE}

**Figure S10. Scenario E – Simulation.** Noise-free and noisy measurements as a function of time.

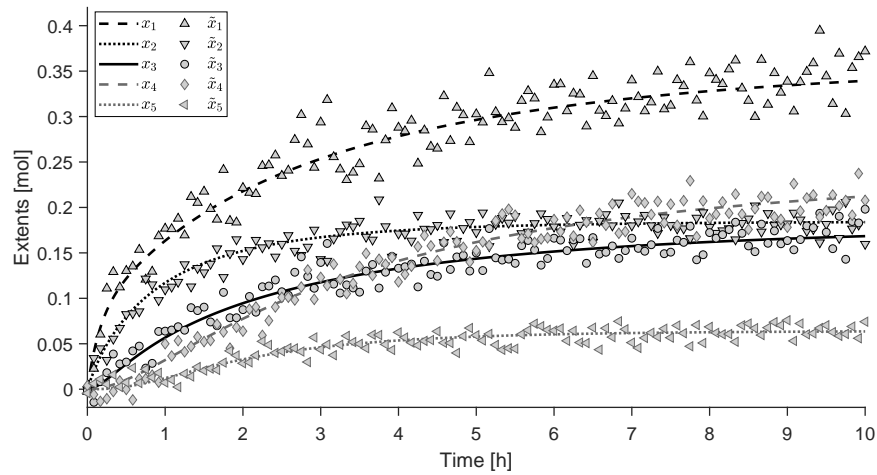

{fig:scenarioD}

**Figure S11. Scenario E – Extent computation.** Observable extents ( $x_1, x_3$ ) and observable extent direction ( $\chi_o$ ) and their computed equivalents ( $\tilde{x}_1, \tilde{x}_3, \tilde{\chi}_o$ ).

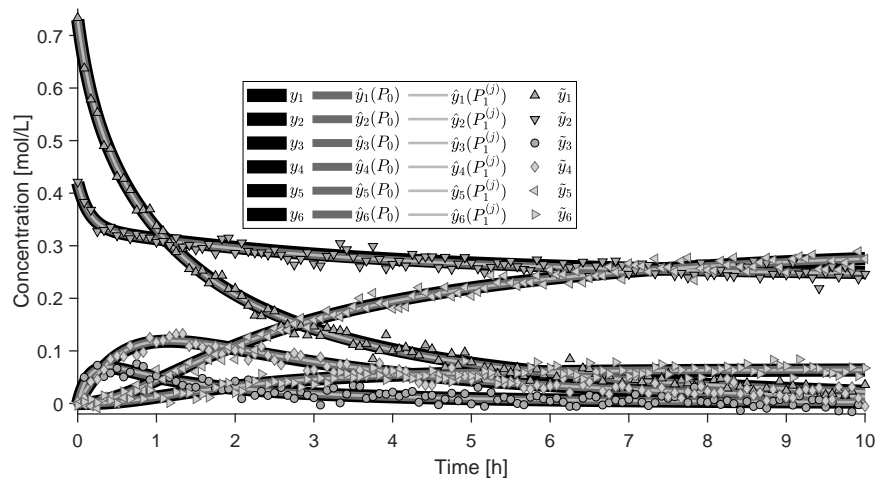

{fig:scenarioE}

**Figure S12. Scenario E – Parameter estimation.** Measured concentrations and simulated profiles obtained with (i) true parameters, (ii) simultaneous parameter estimation  $P_0$ , and (iii) incremental parameter estimation  $P_1^{(1)}$  and  $P_1^{(2)}$ . The produced simulation results exhibit strong overlap, meaning that the identified models closely approximate the ground truth model.
