# Supplementary material
Source: MDPI journal article supplement (https://www.mdpi.com/2227-9717/7/2/75)

Rate law 1: Monod  
Rate law 2: Zero-Order

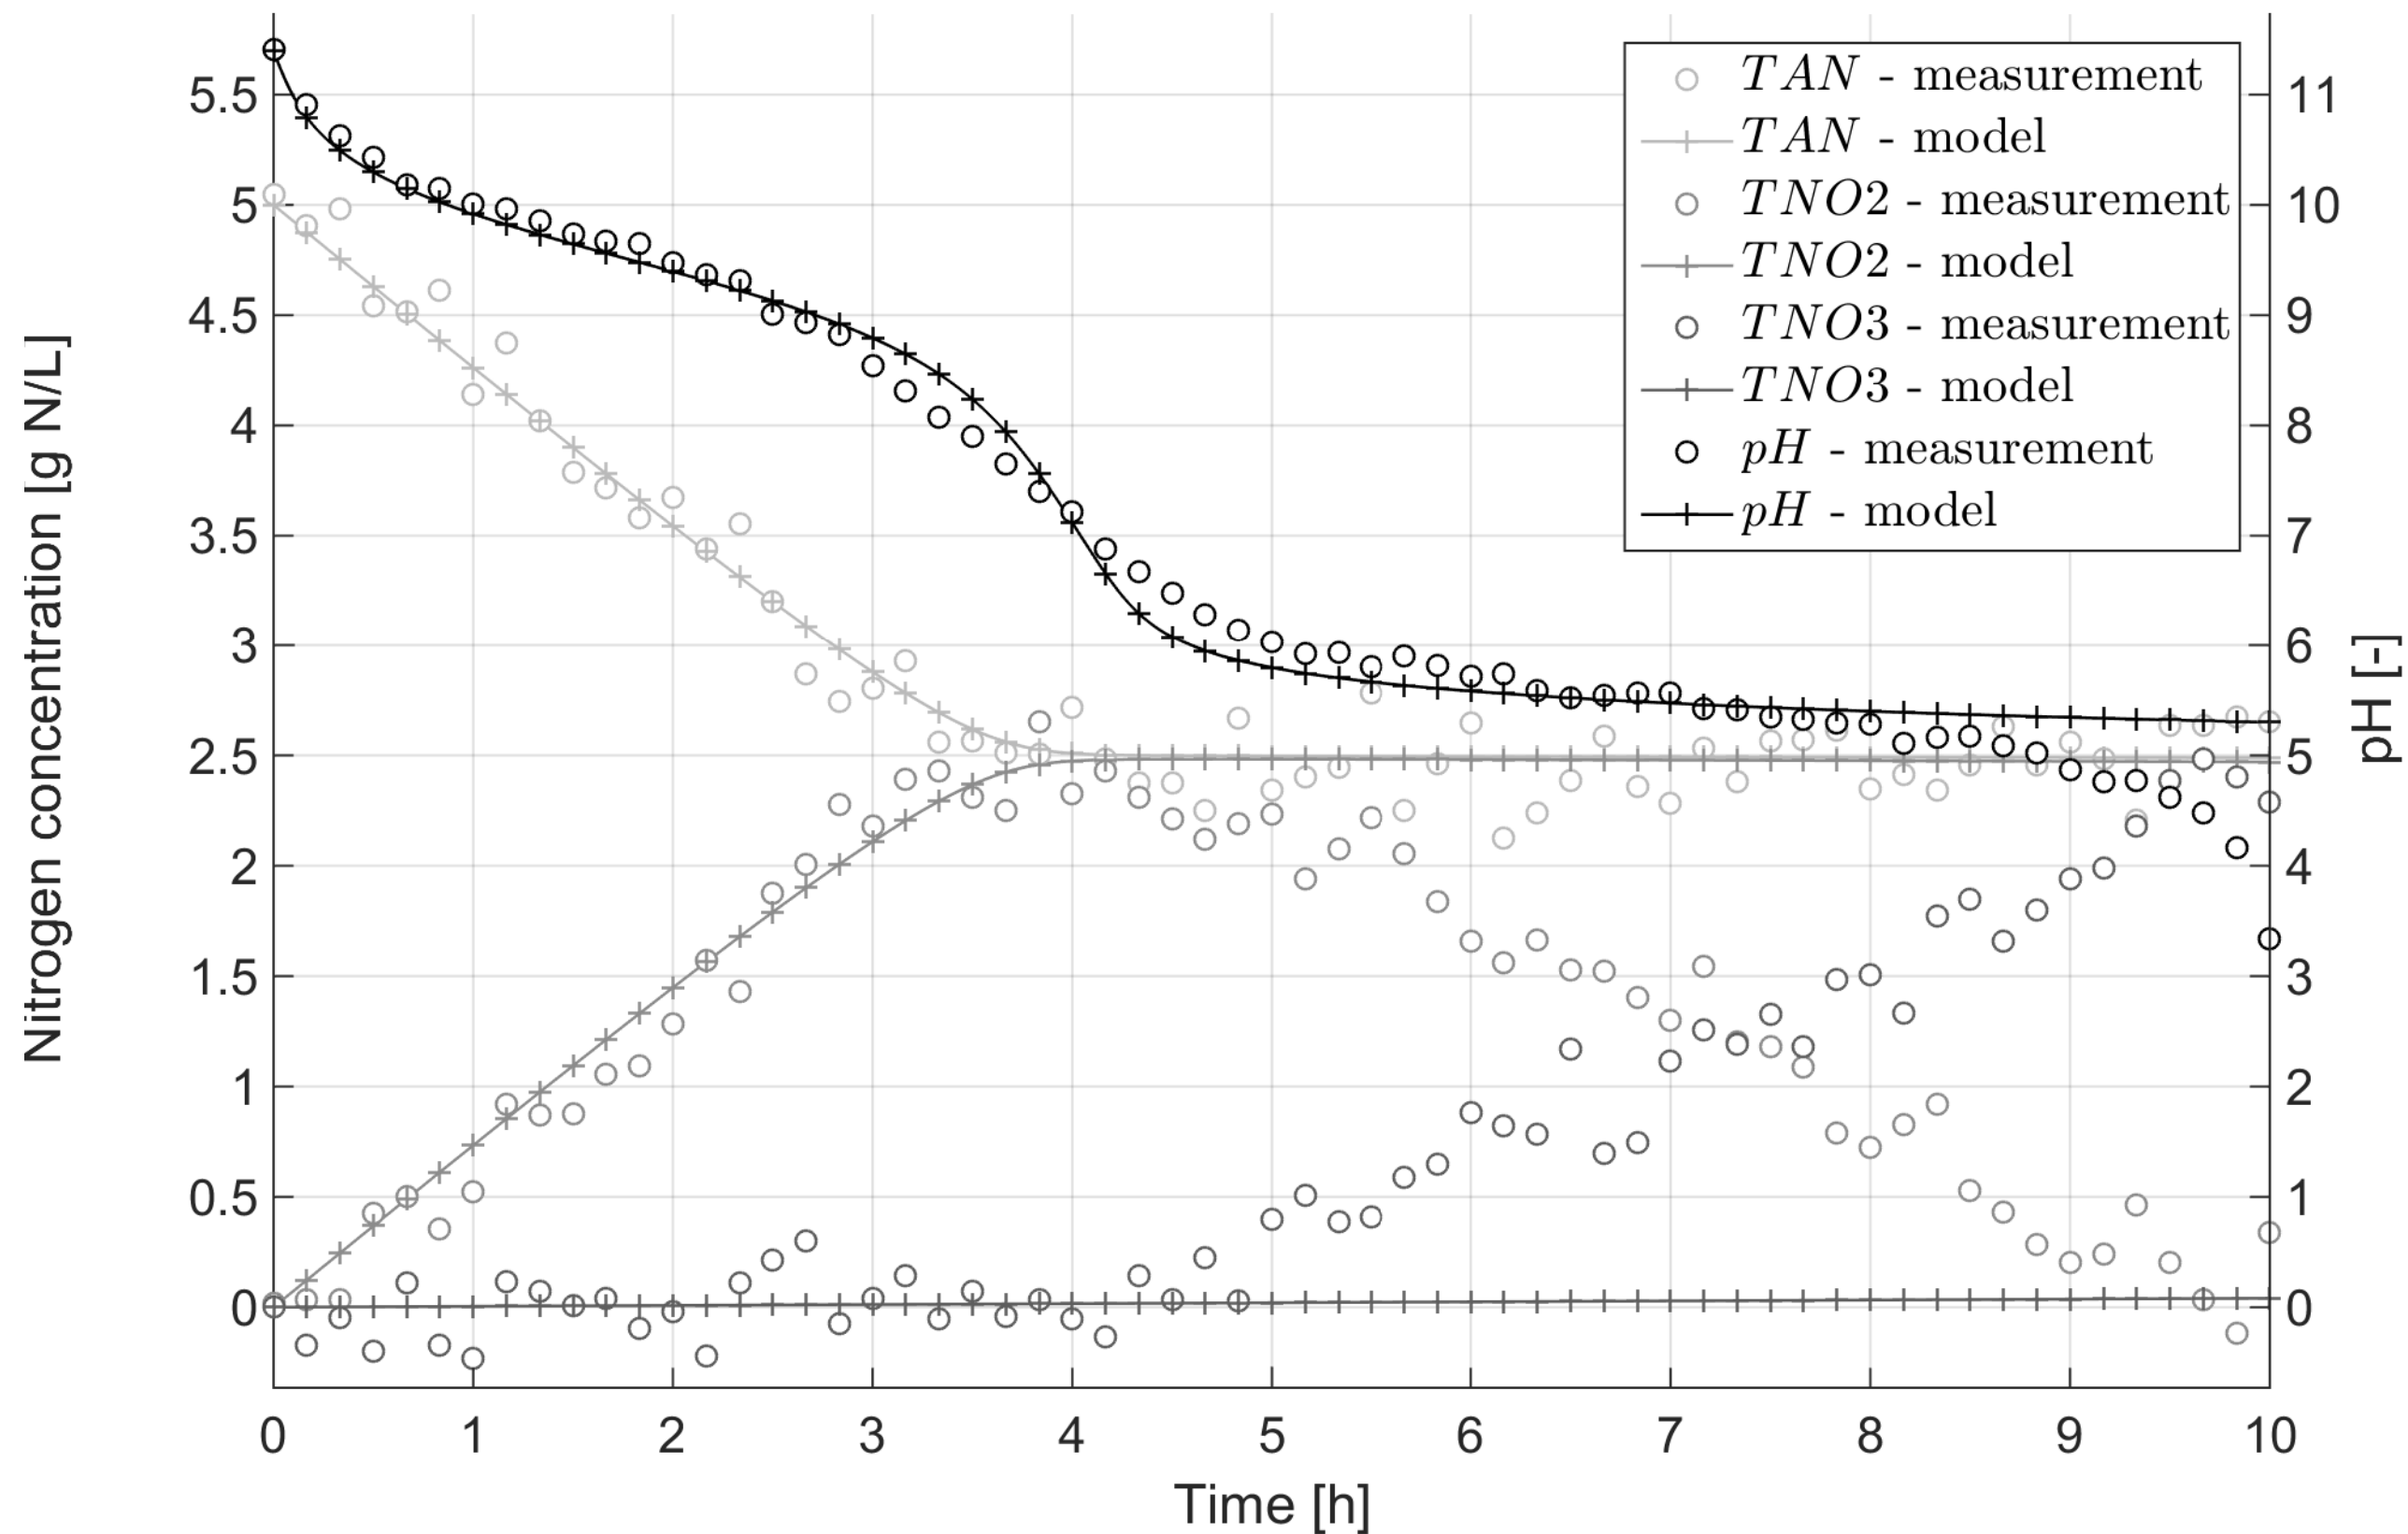

Supplement: s1 [file s1]

Rate law 1: Zero-Order

Rate law 2: Monod

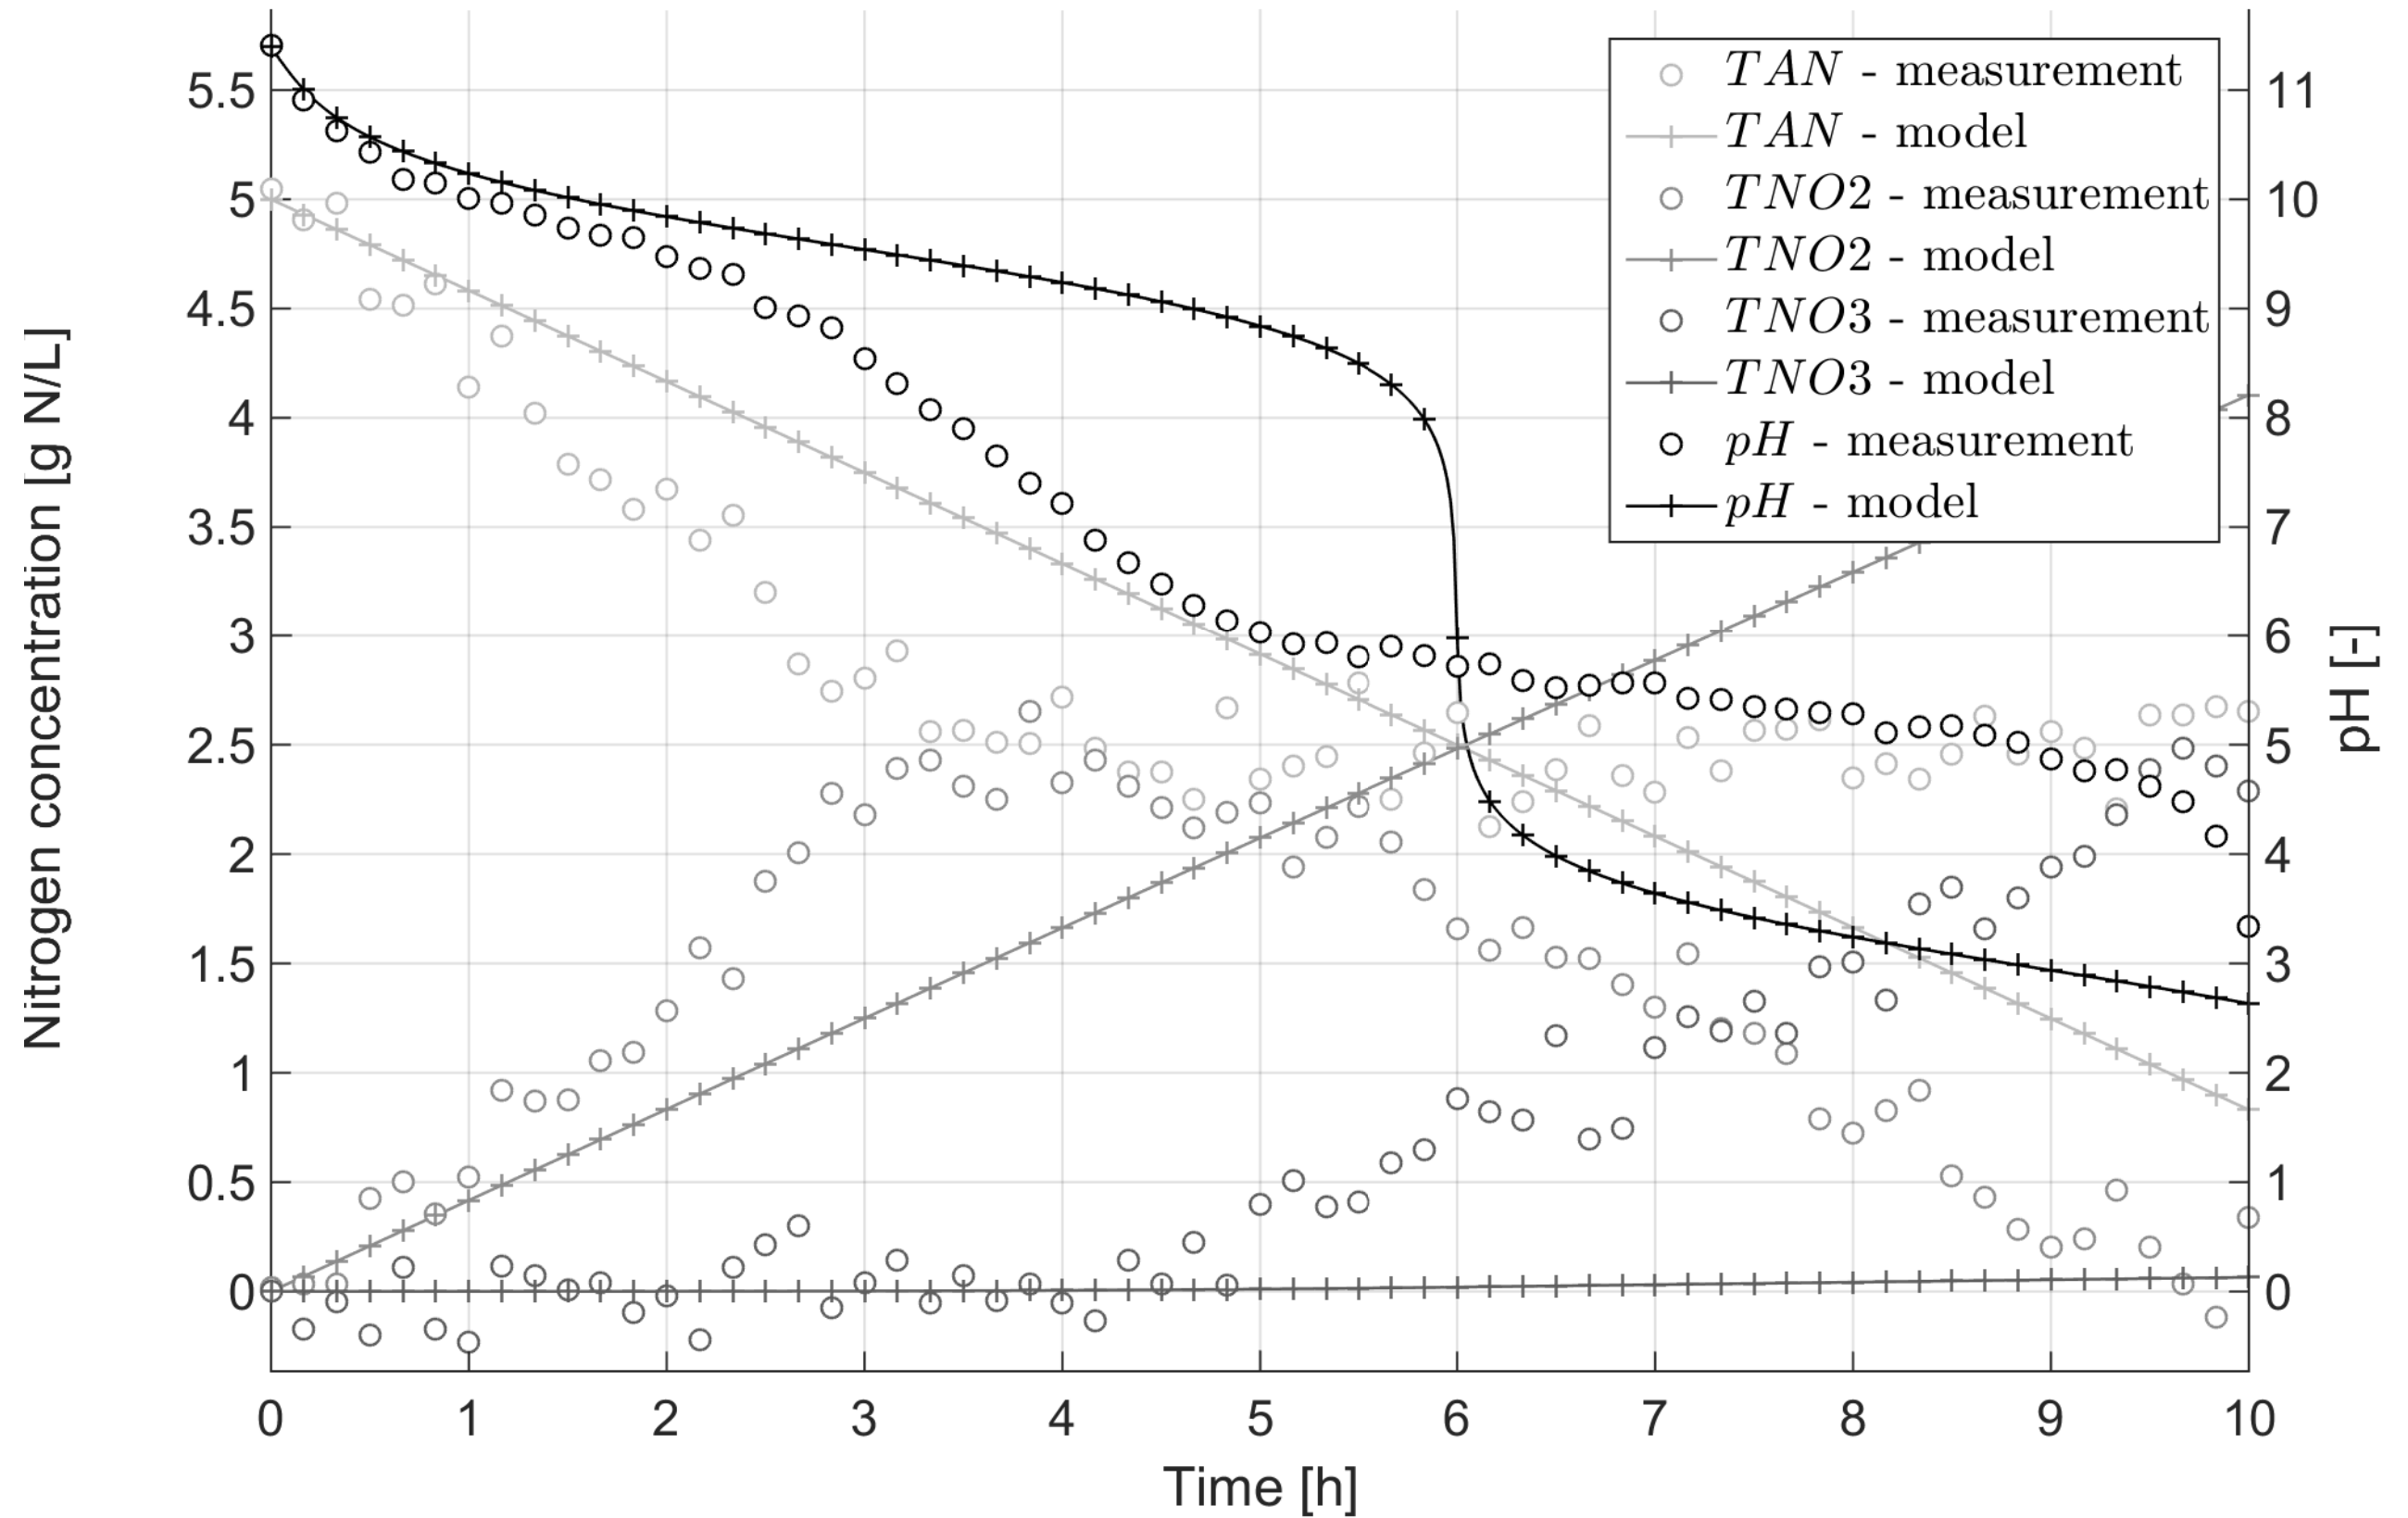

Supplement: s1 [file s1]

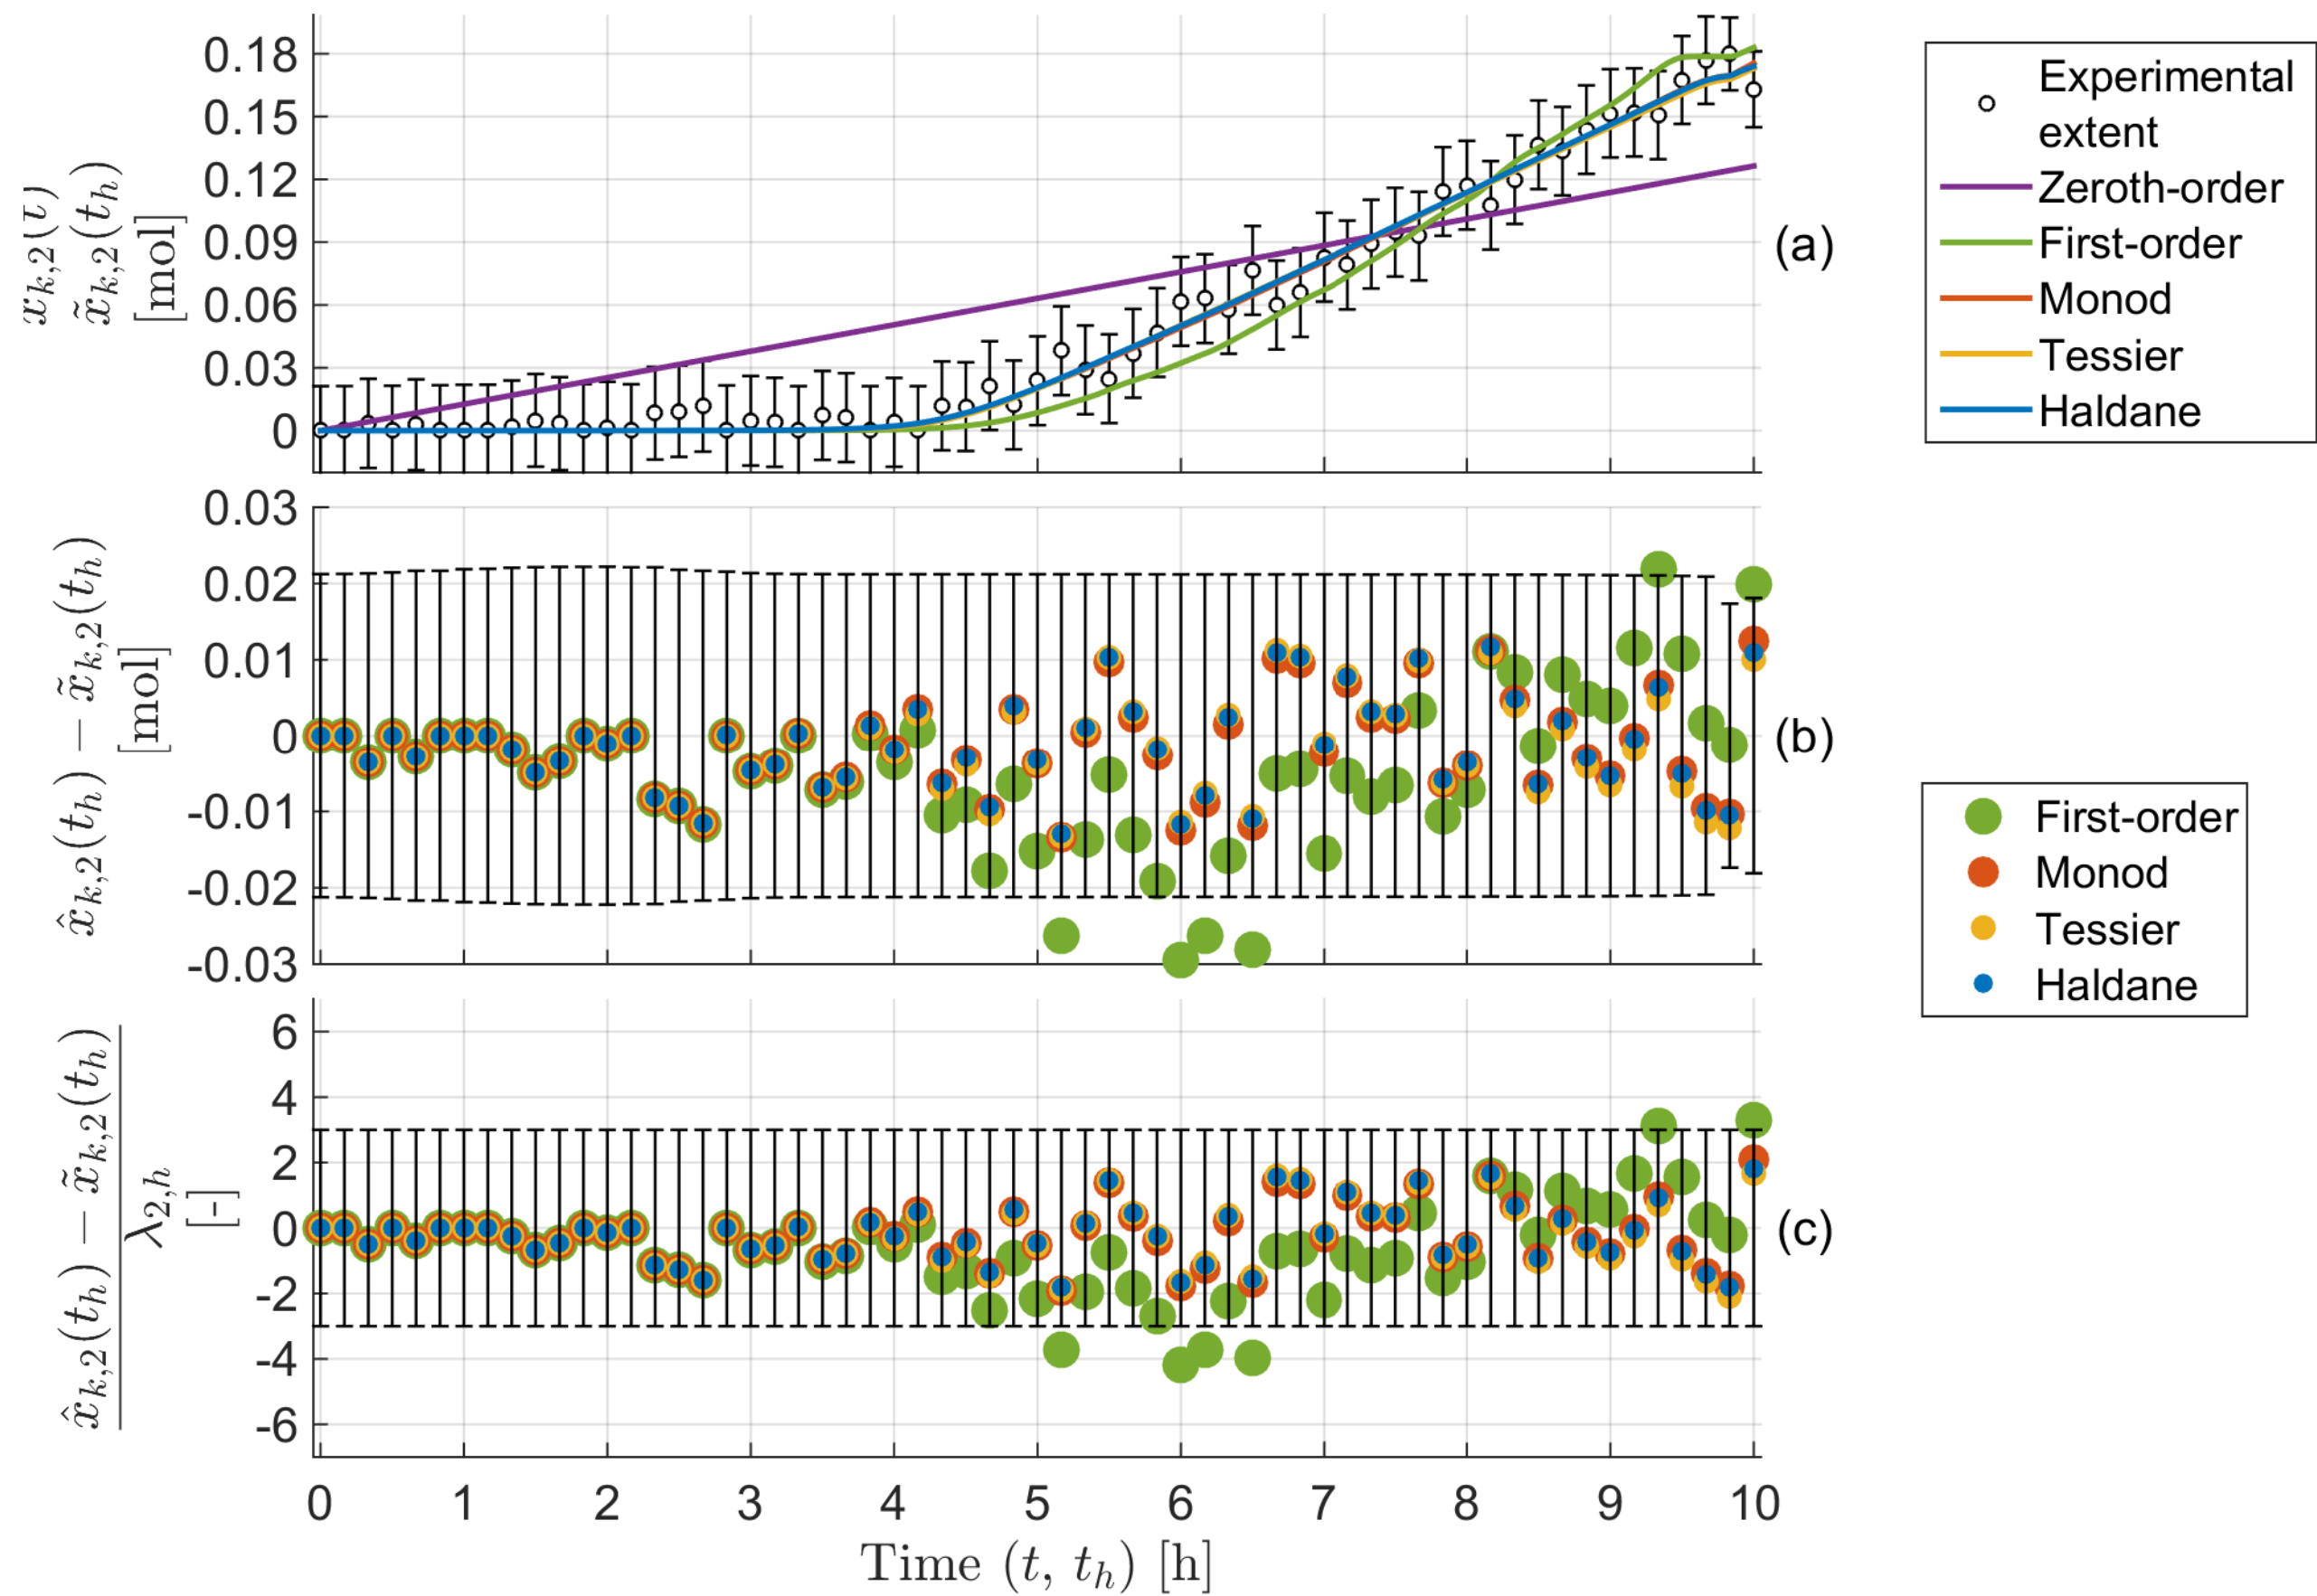

Supplement: s1 [file s1]

Rate law 1: Monod  
Rate law 2: First-Order

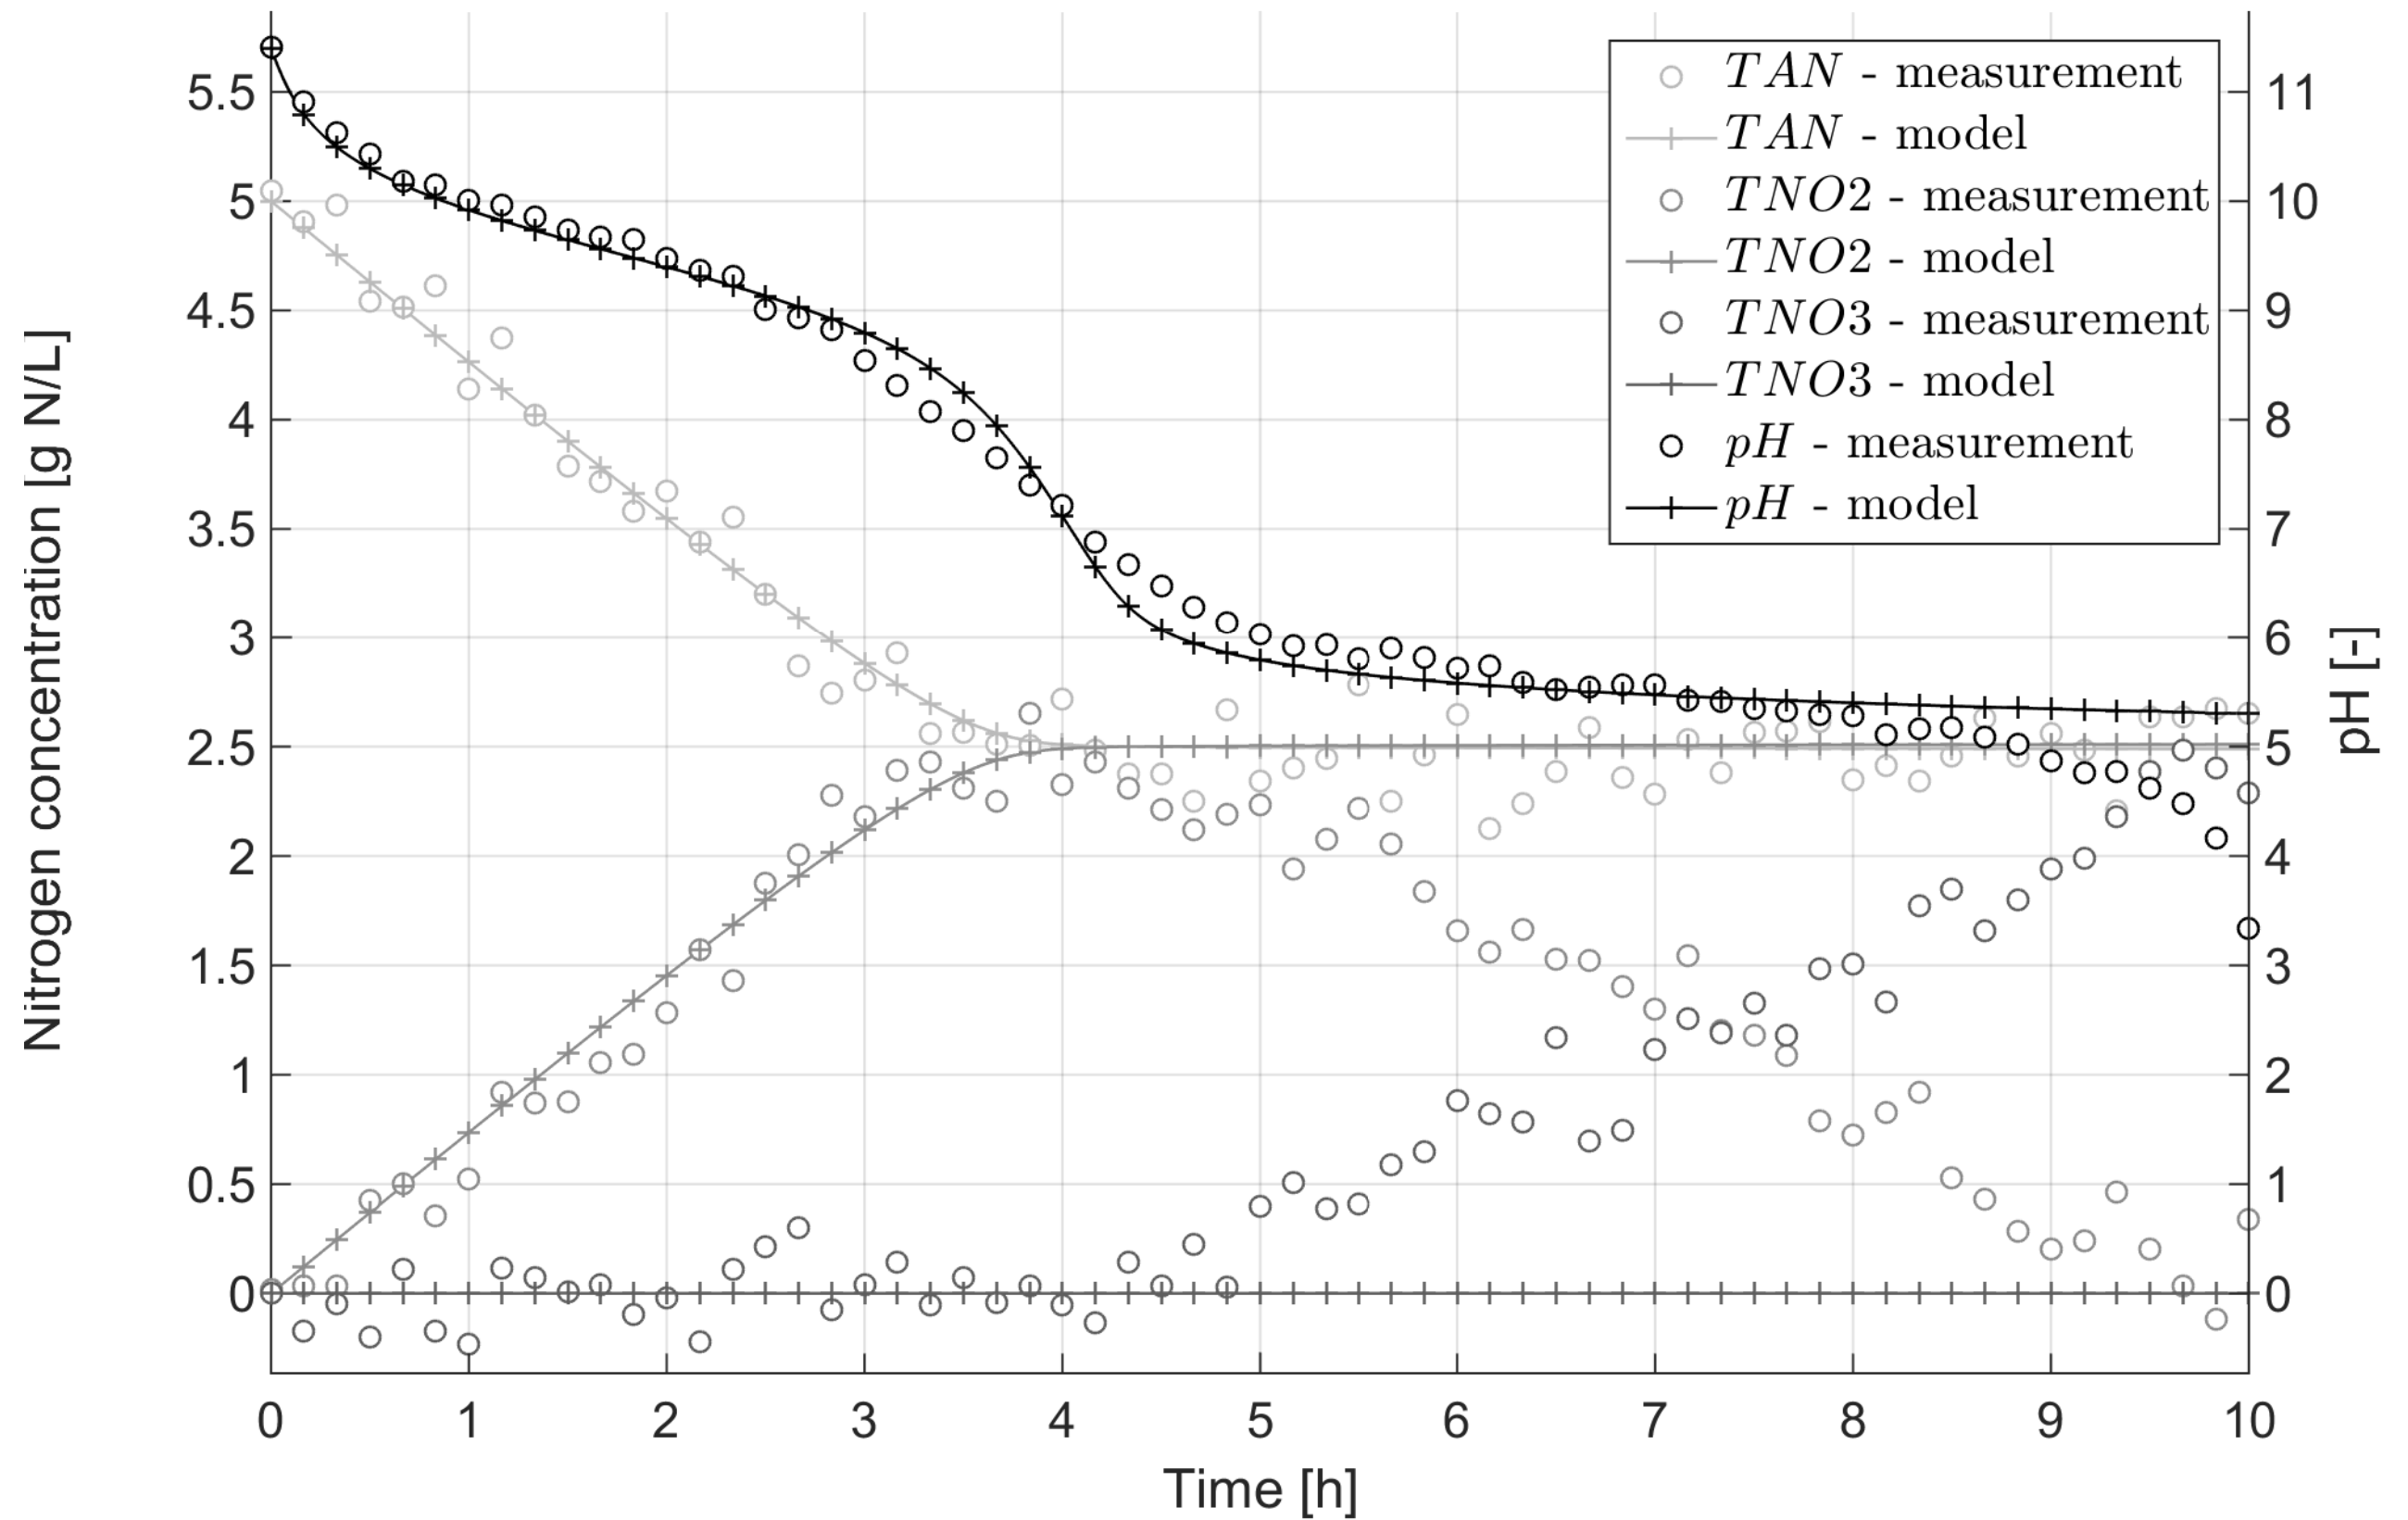

Supplement: s1 [file s1]

Rate law 1: Tessier  
Rate law 2: Haldane

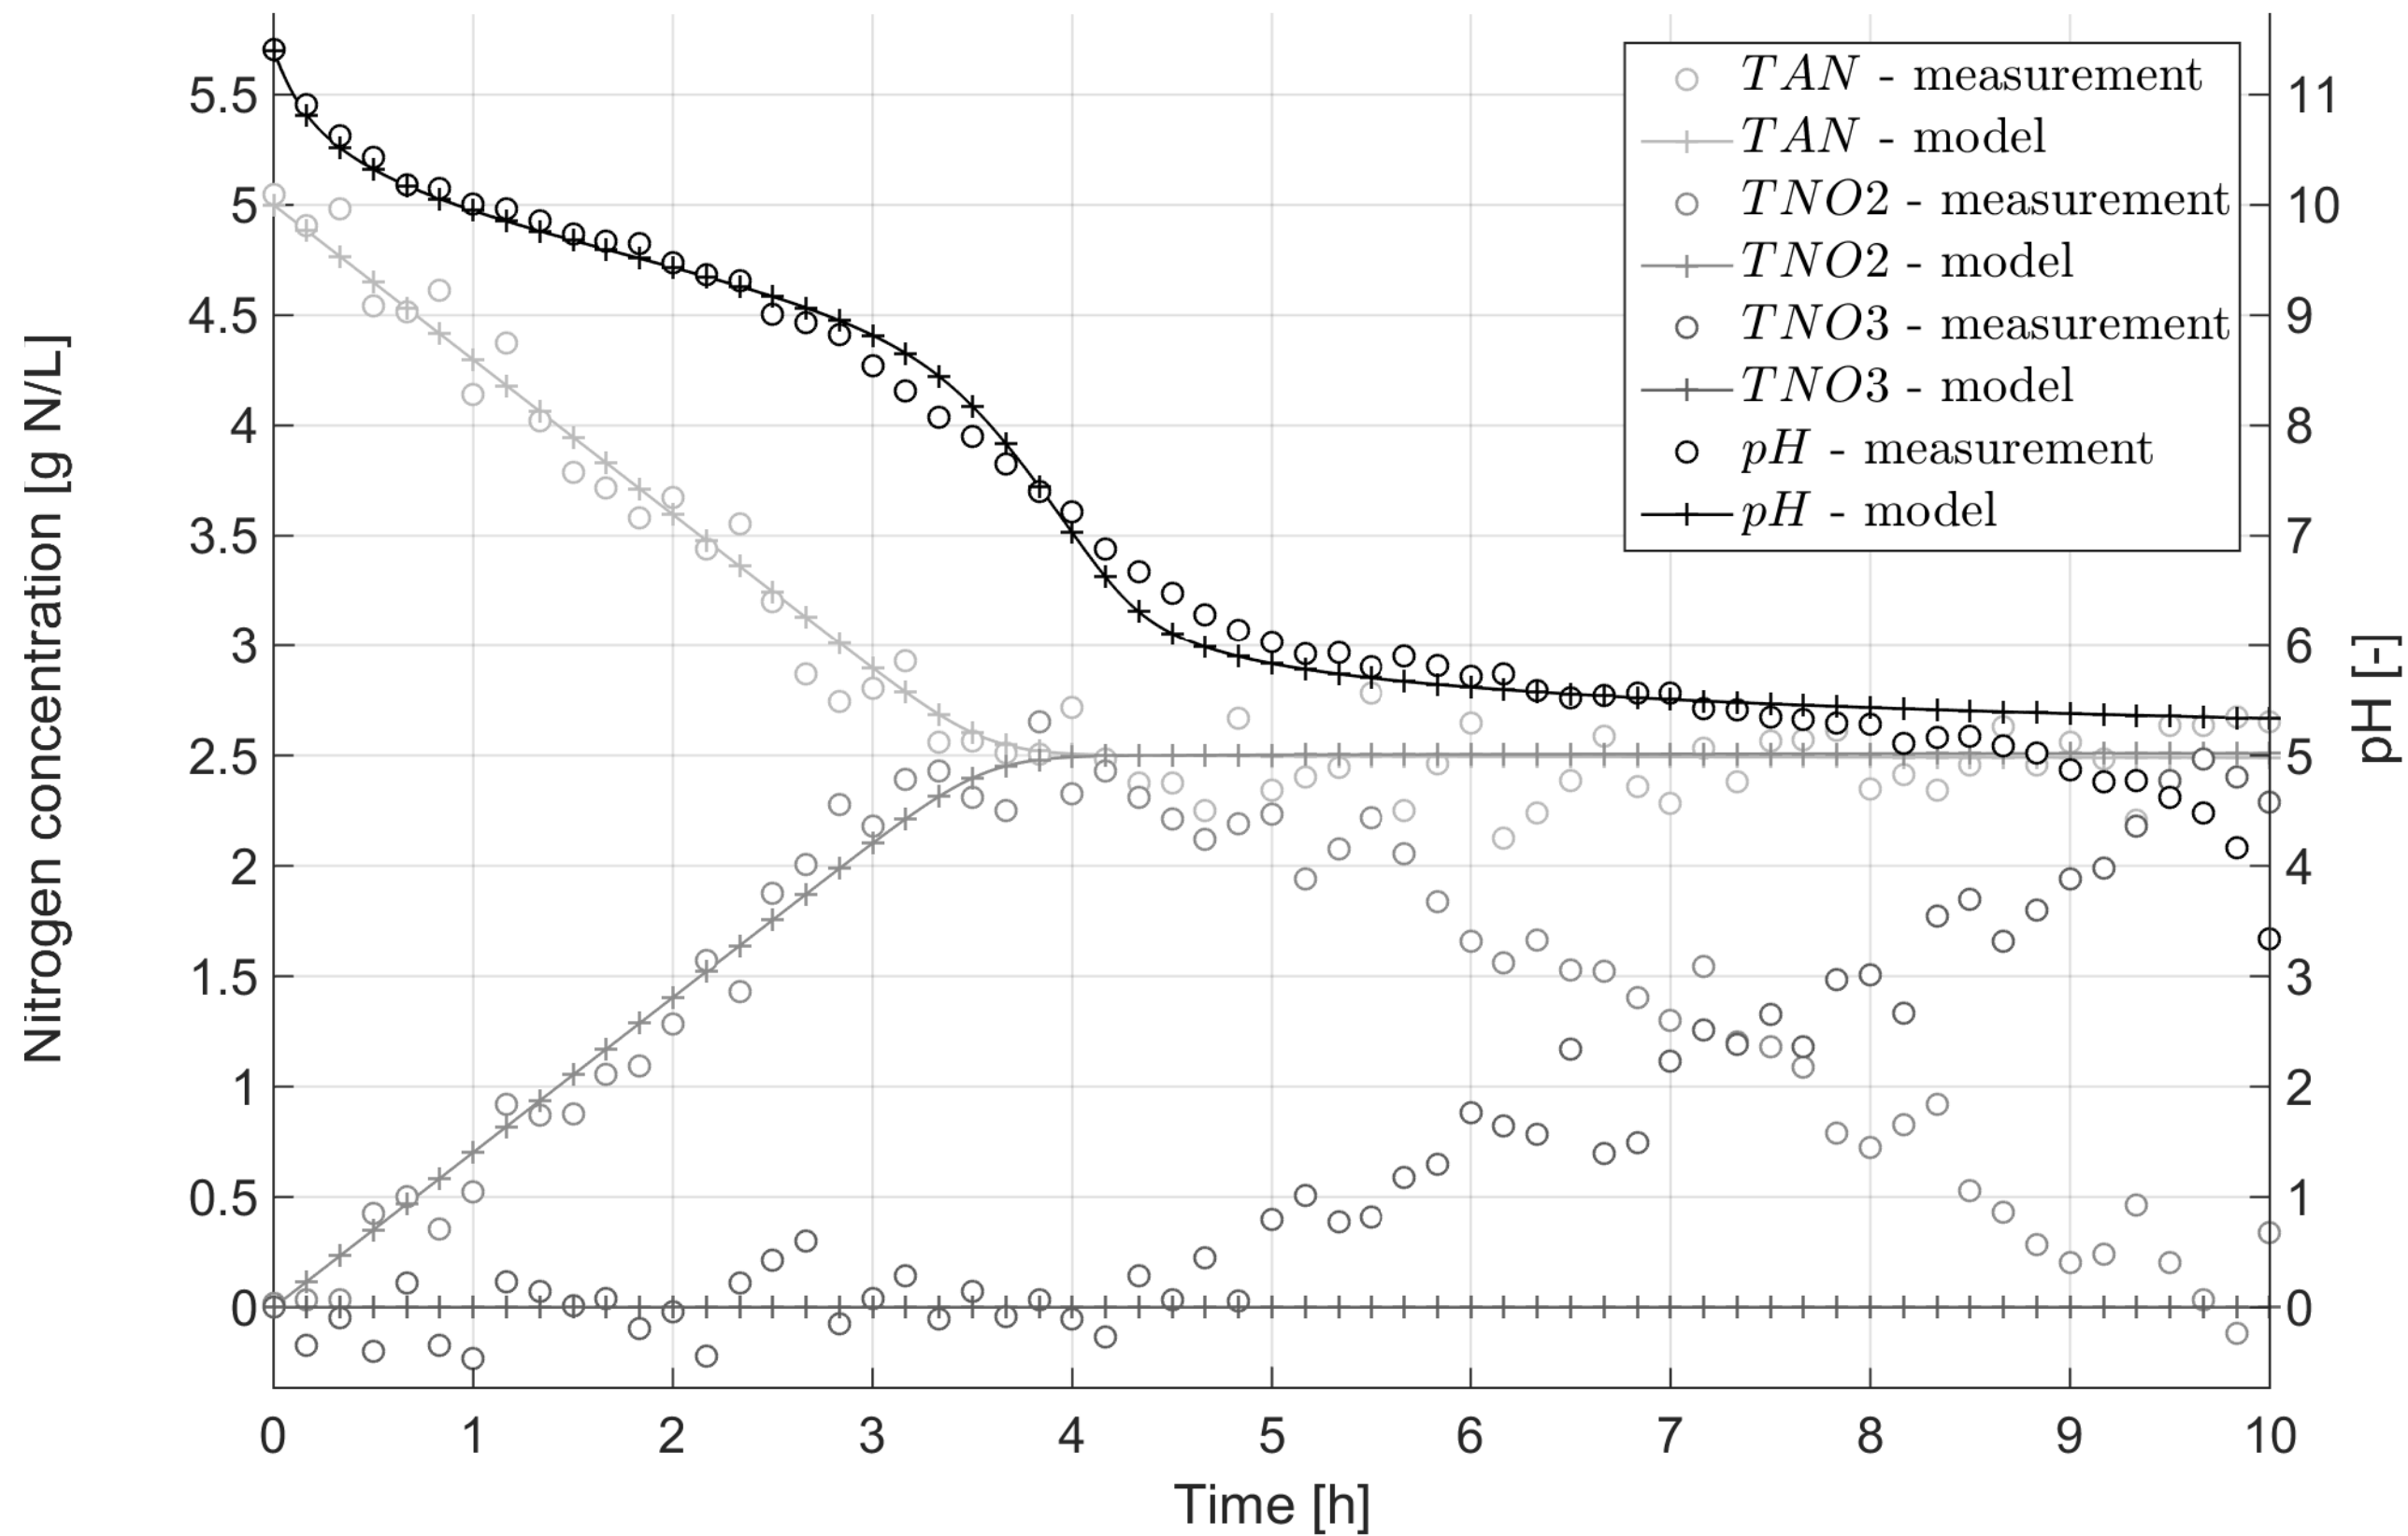

Supplement: s1 [file s1]

Rate law 1: Tessier  
Rate law 2: First-Order

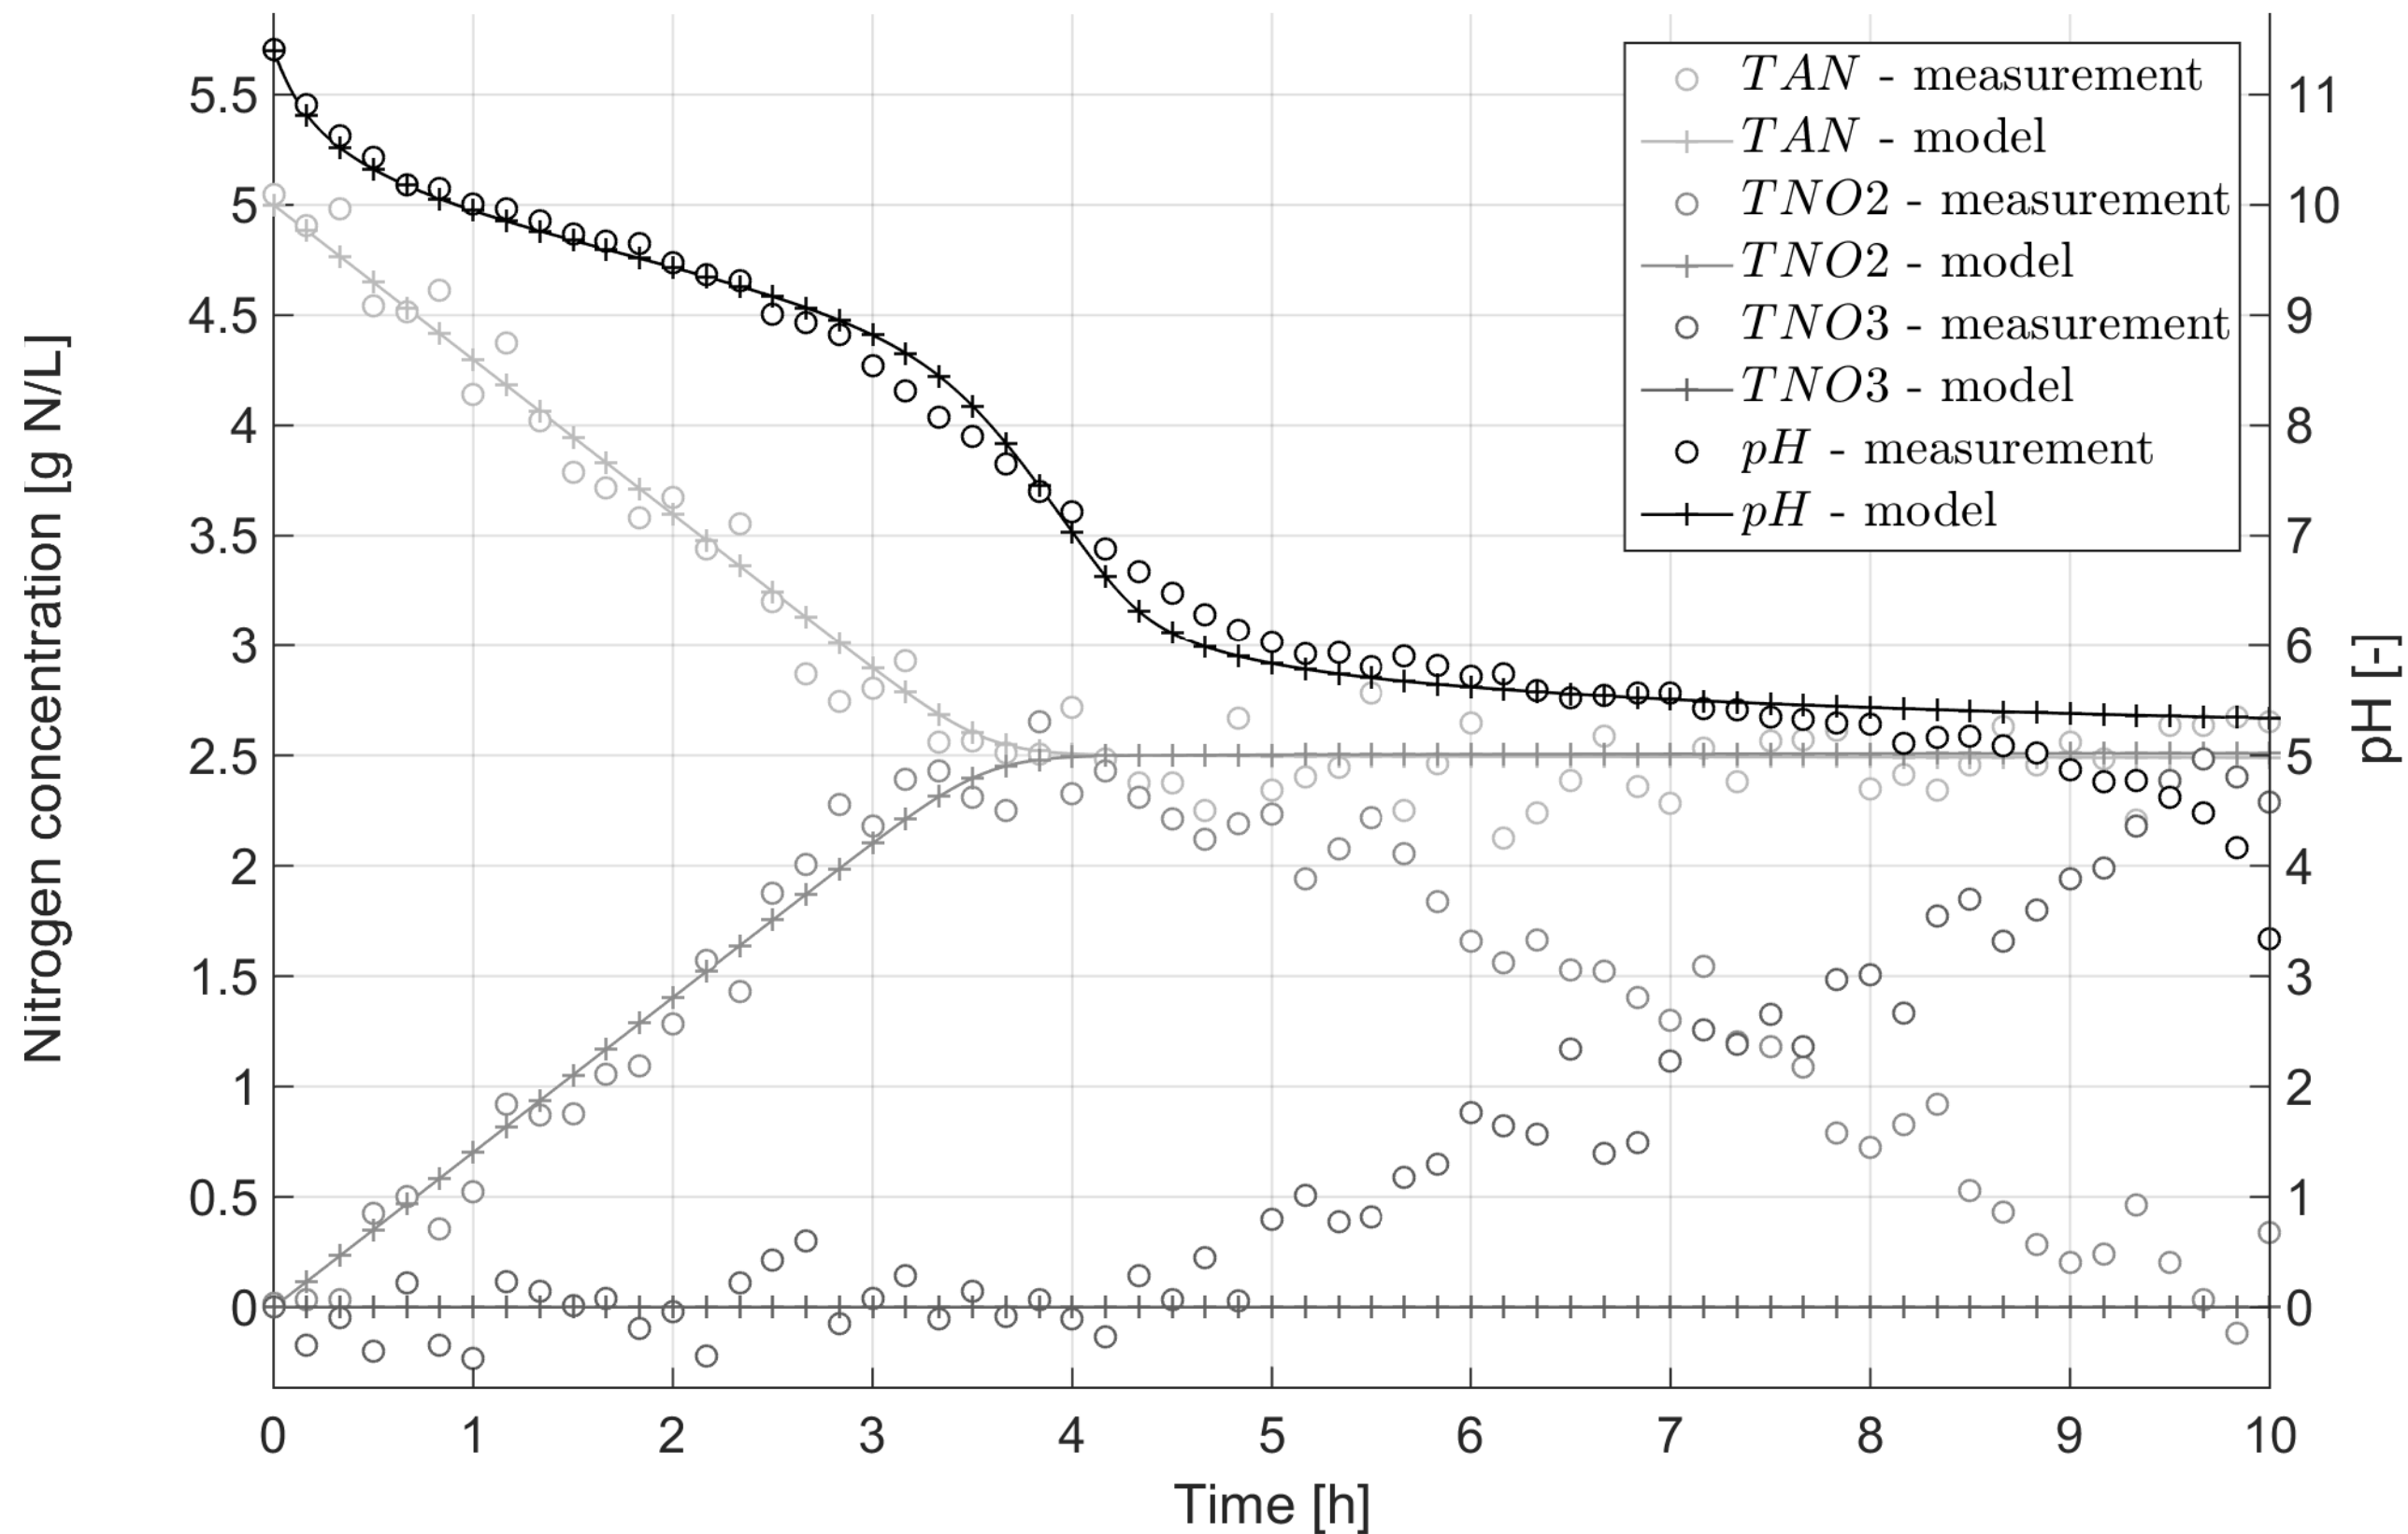

Supplement: s1 [file s1]

Rate law 1: Haldane  
Rate law 2: First-Order

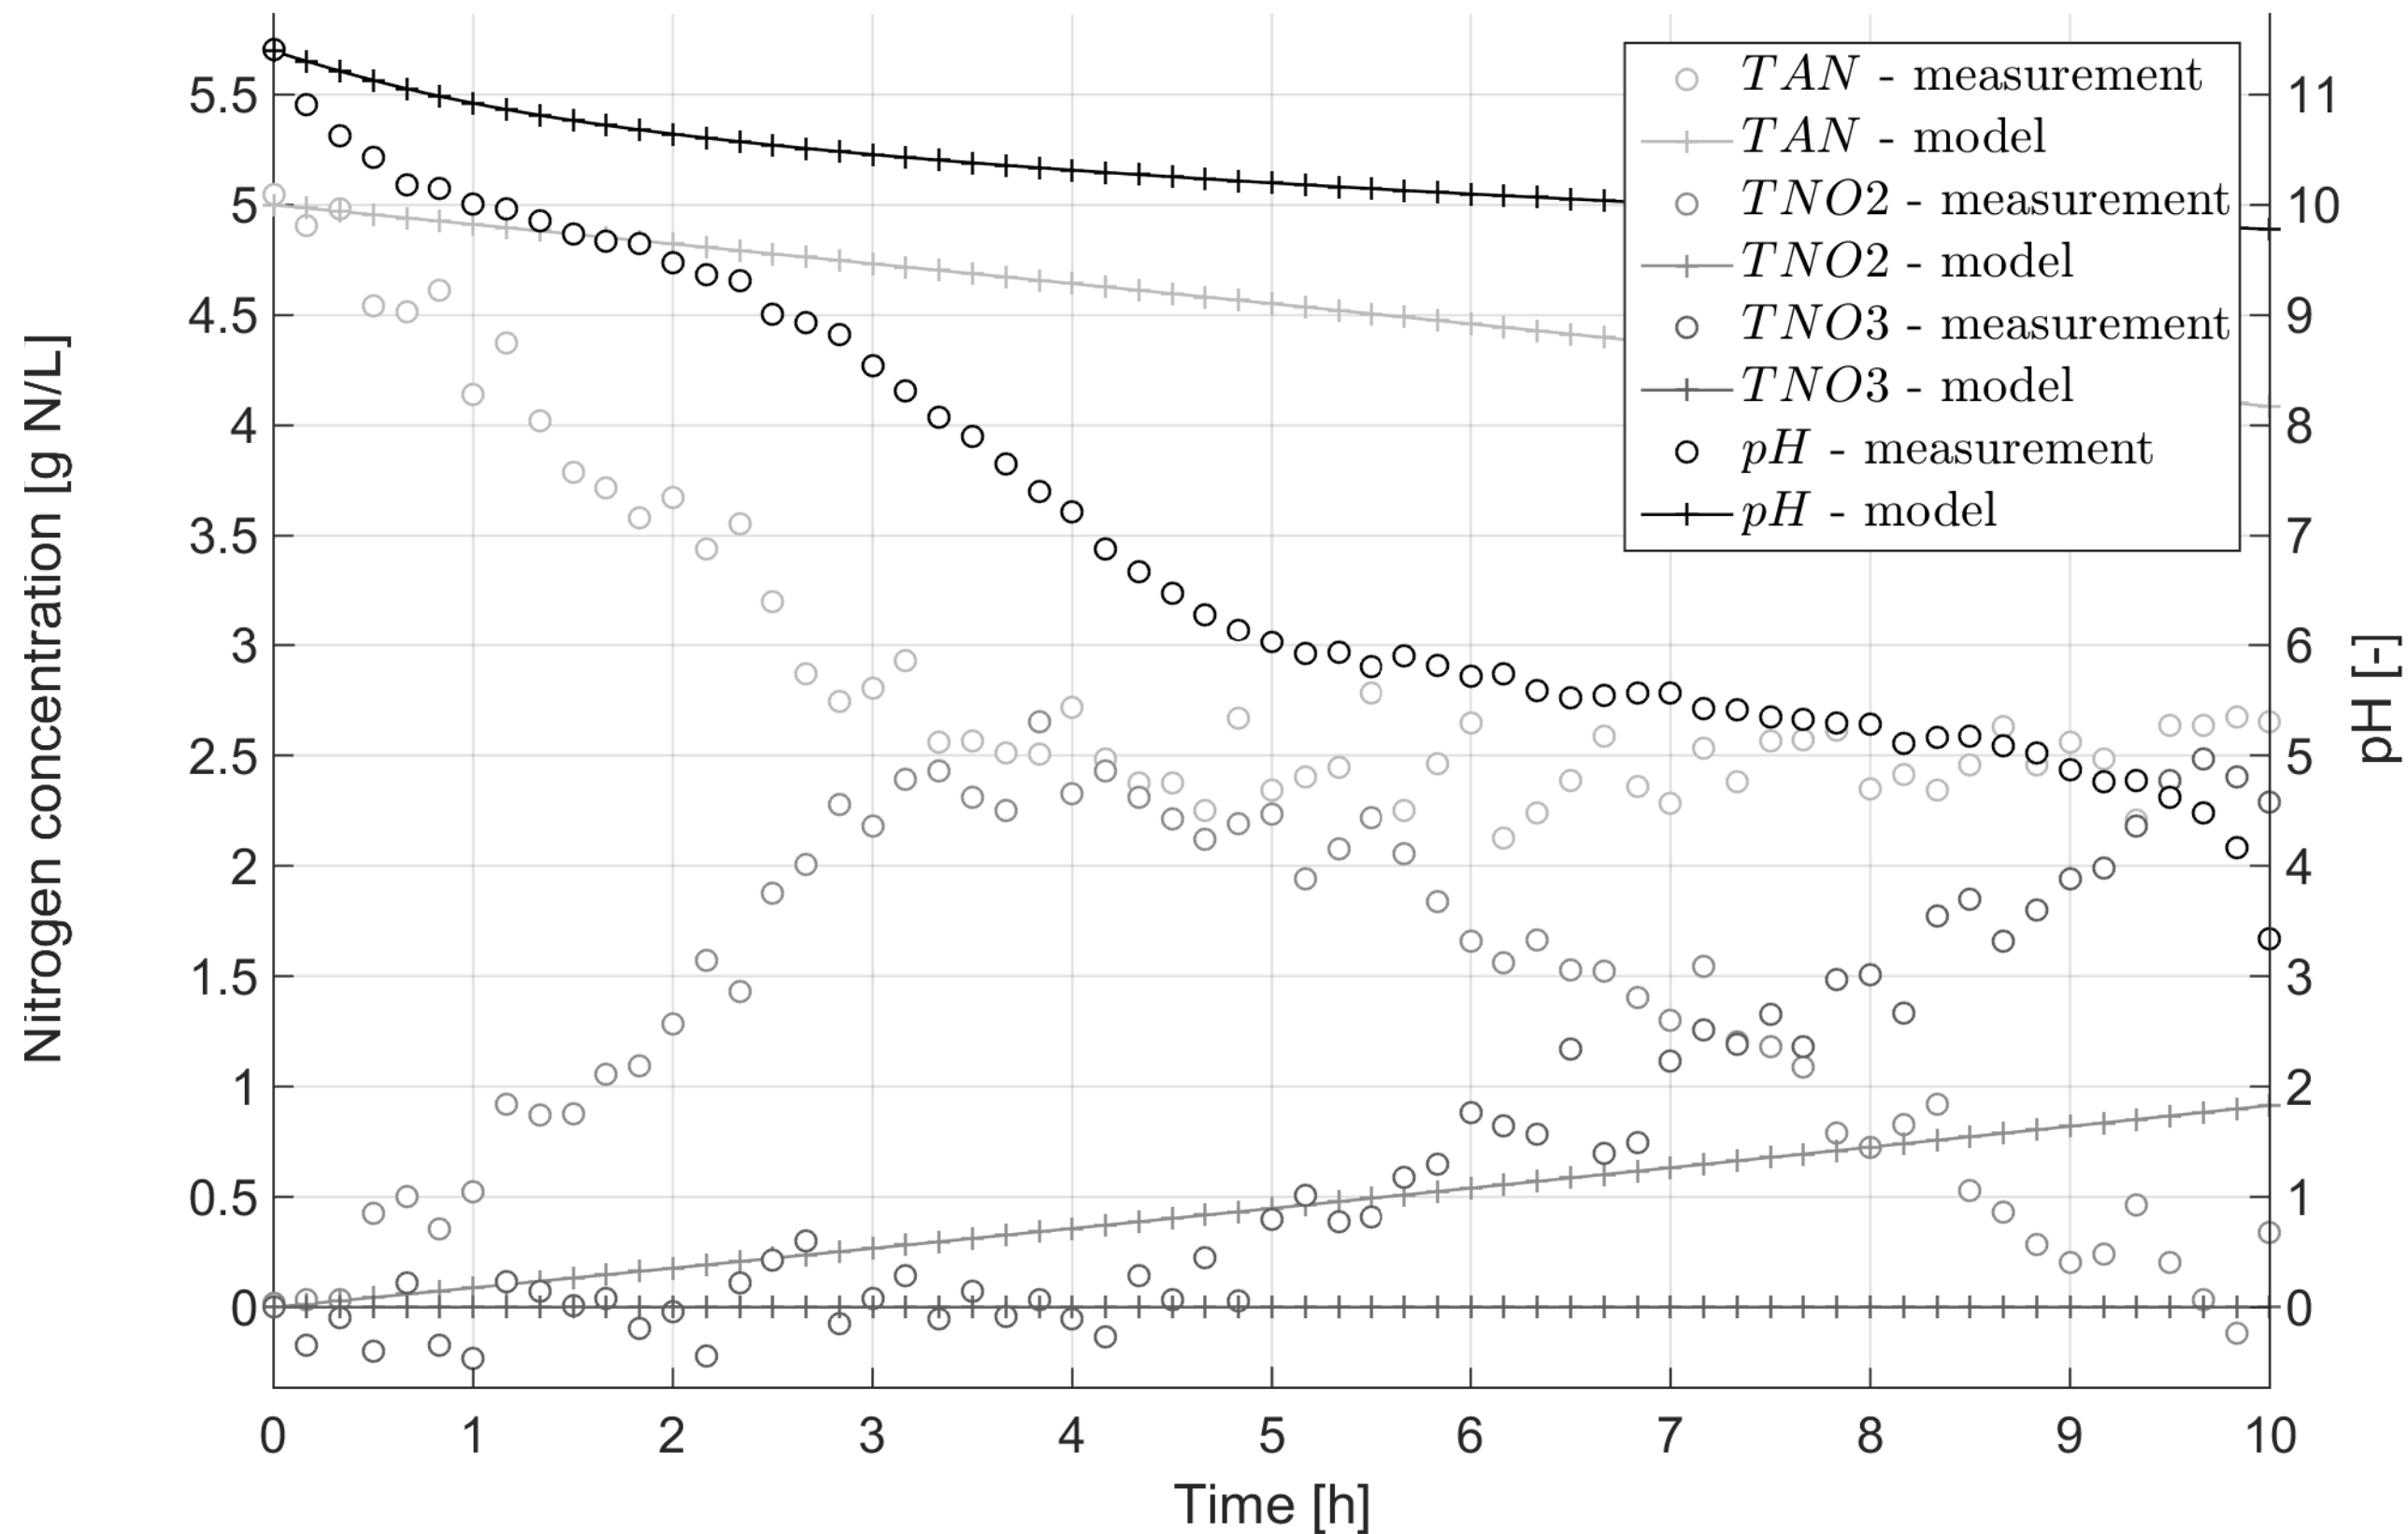

Supplement: s1 [file s1]

Rate law 1: Monod  
Rate law 2: Tessier

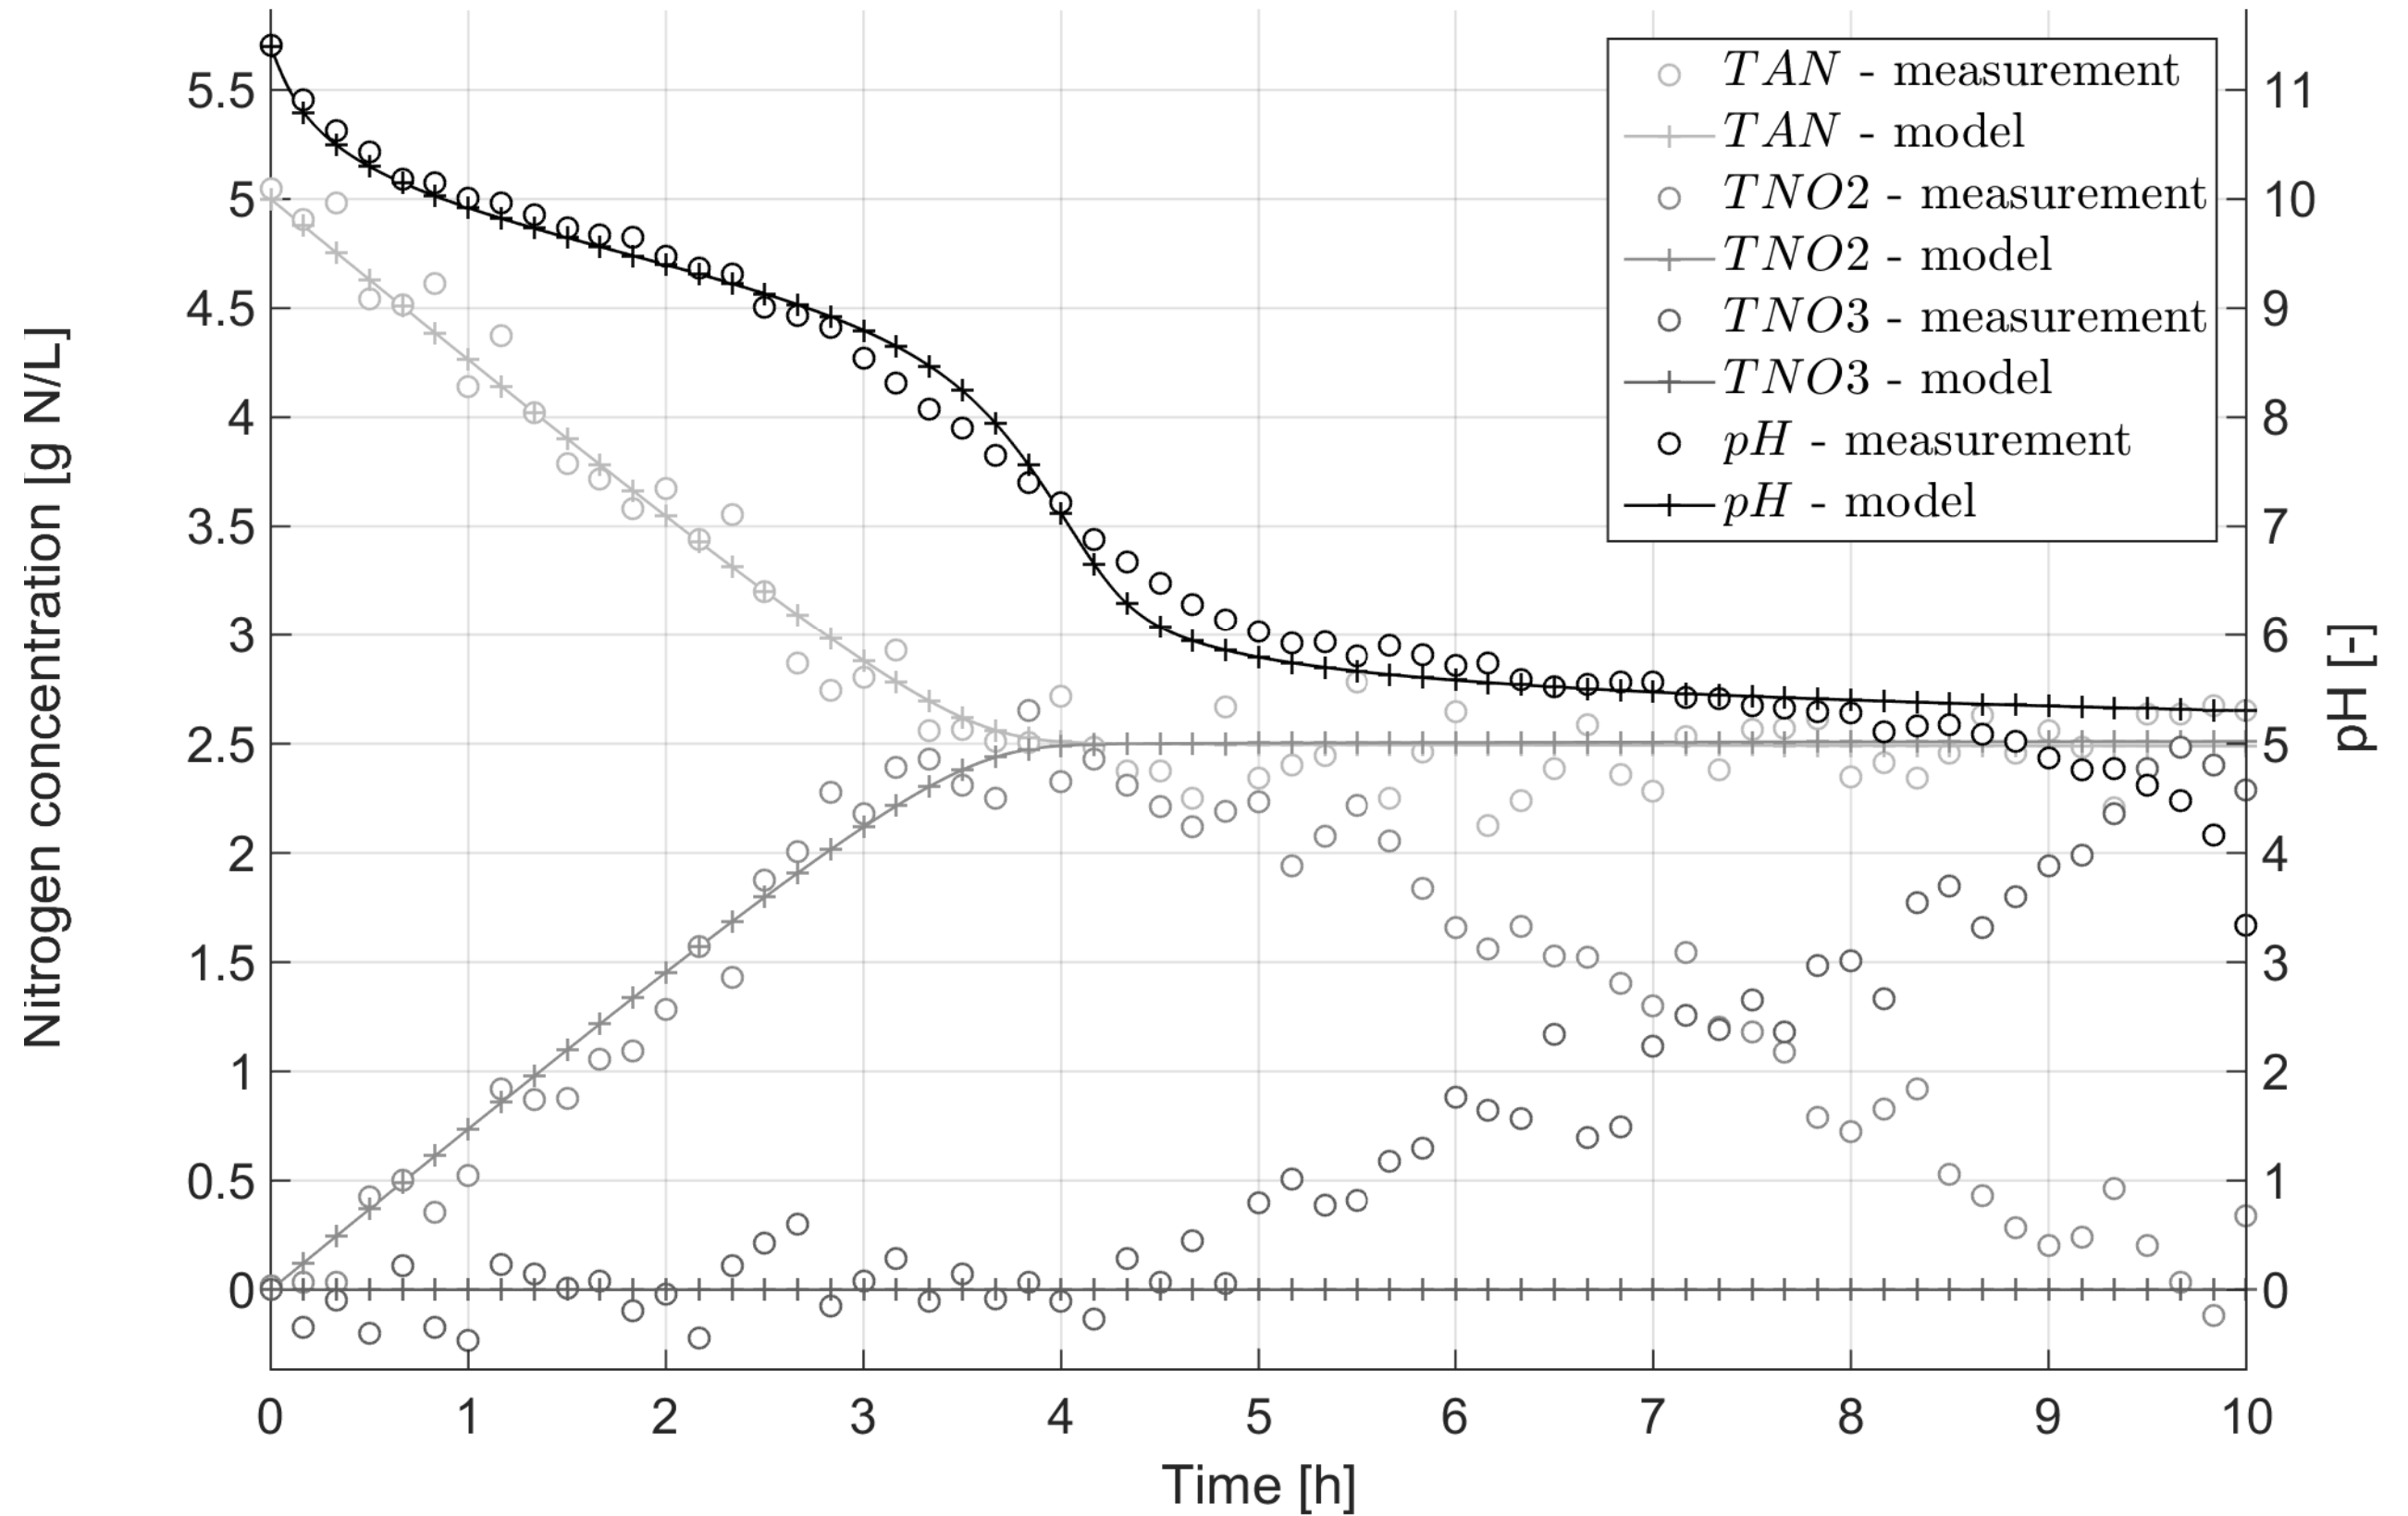

Supplement: s1 [file s1]

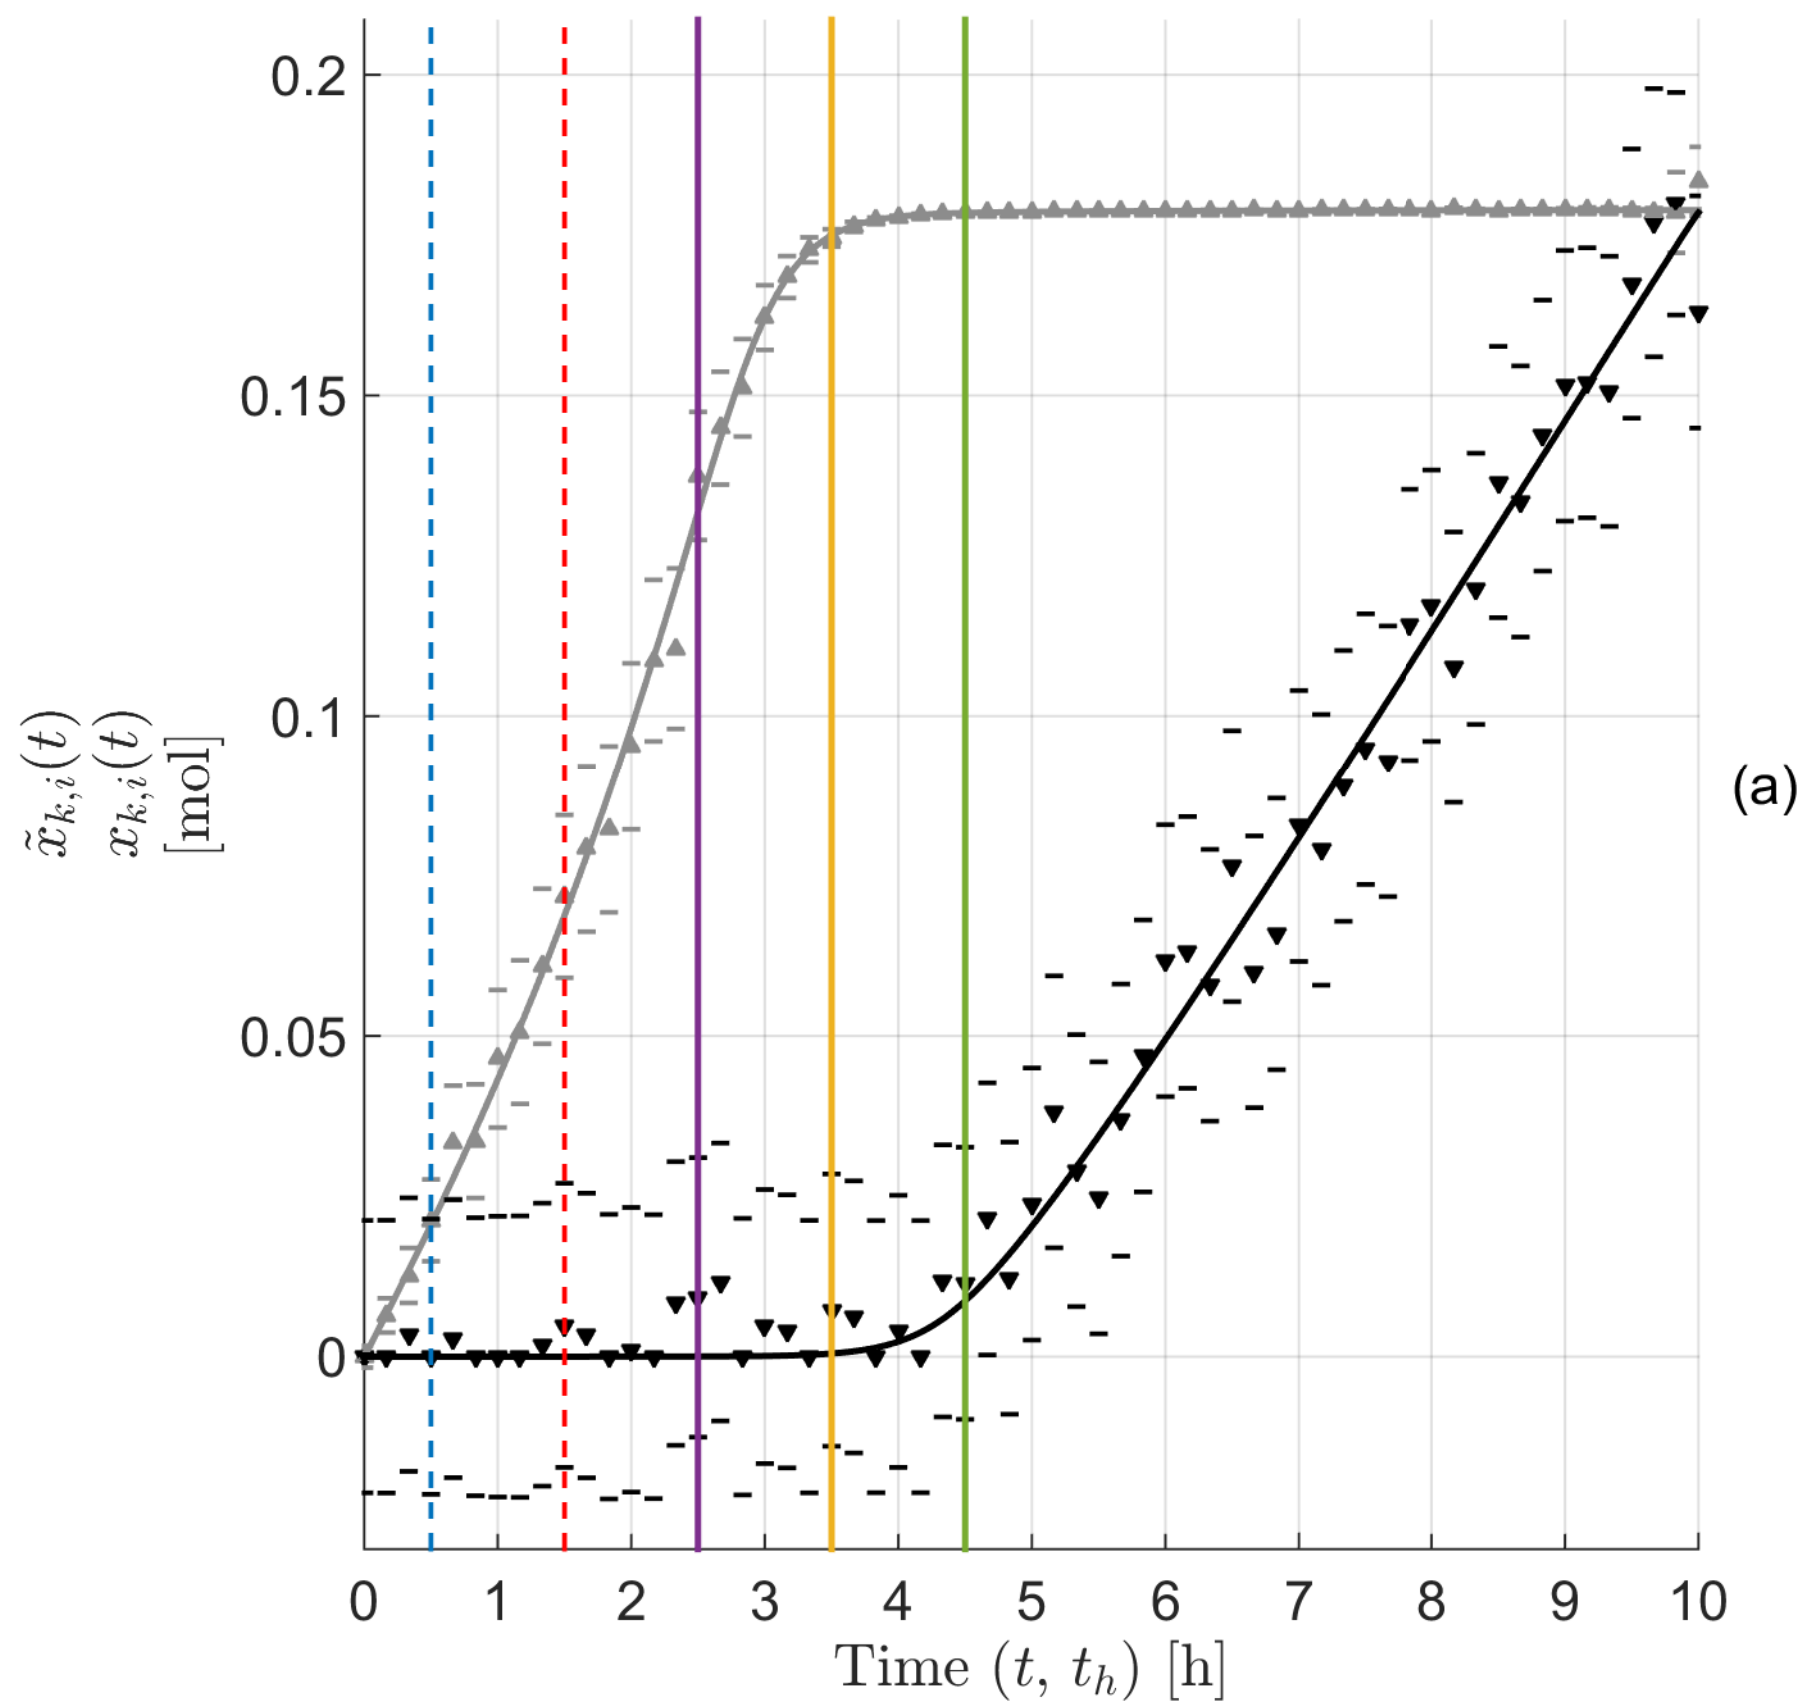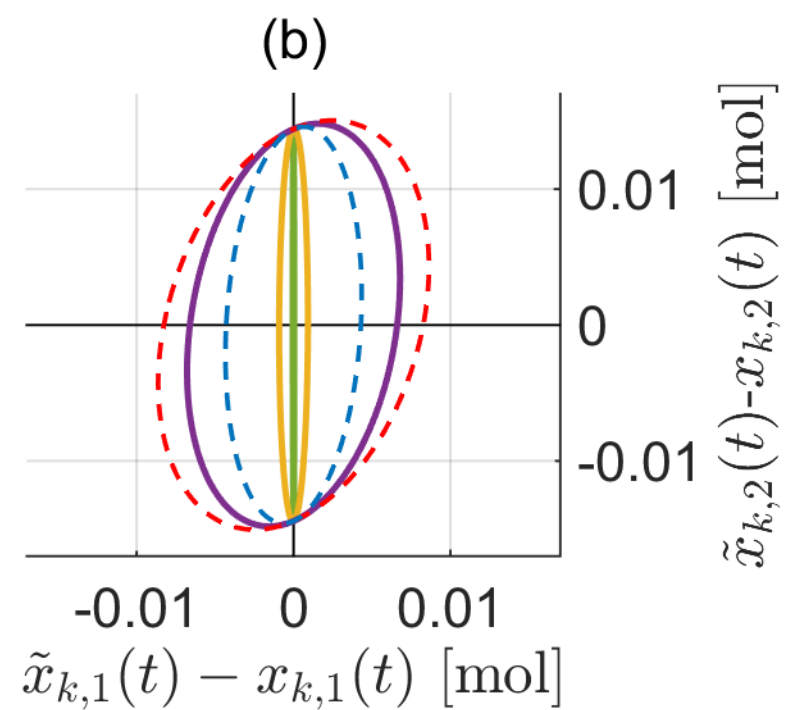

Supplement: s1 [file s1]

Rate law 1: Tessier  
Rate law 2: Tessier

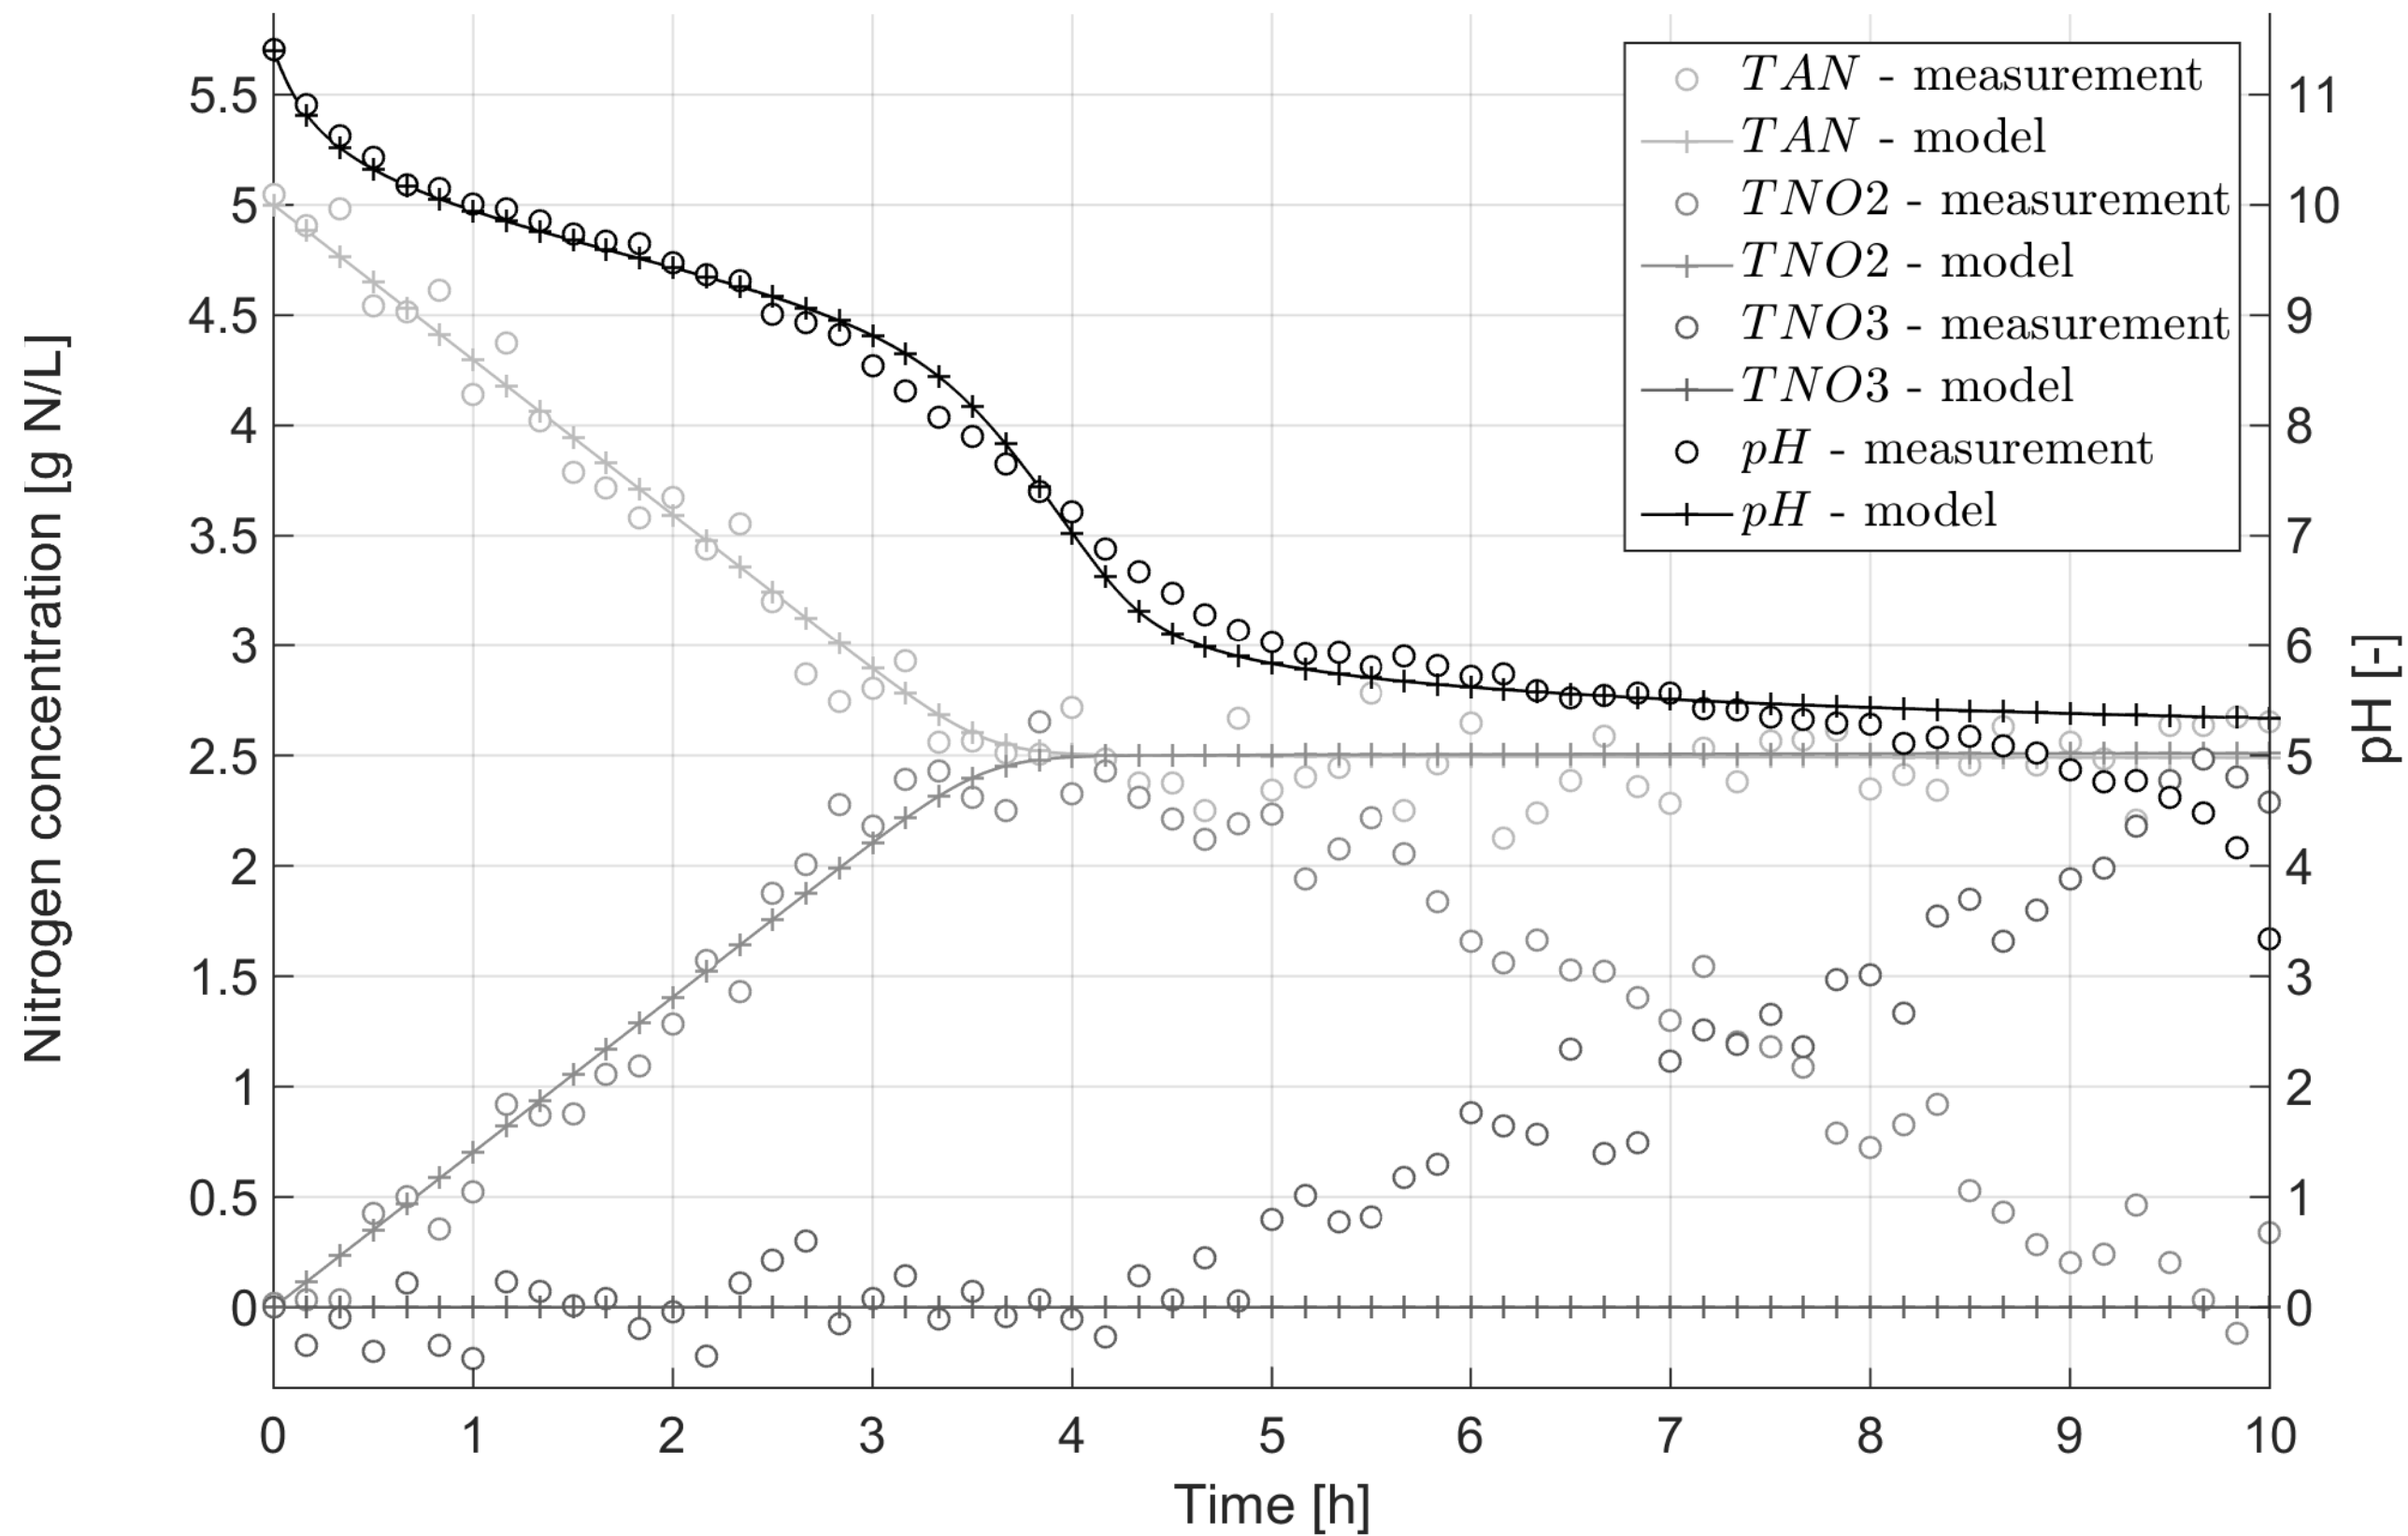

Supplement: s1 [file s1]

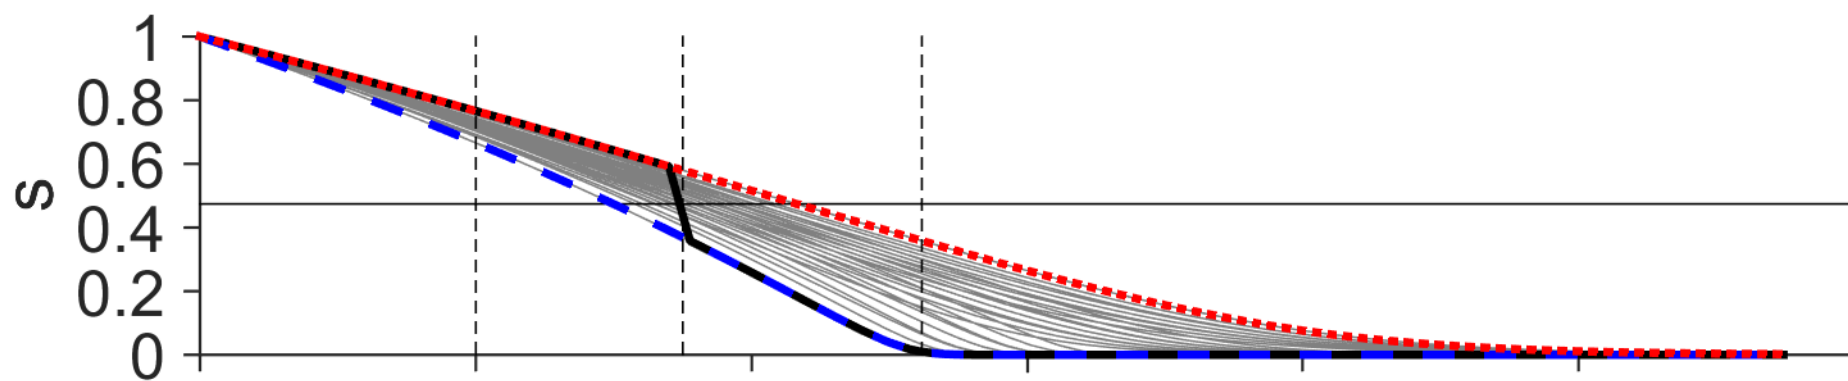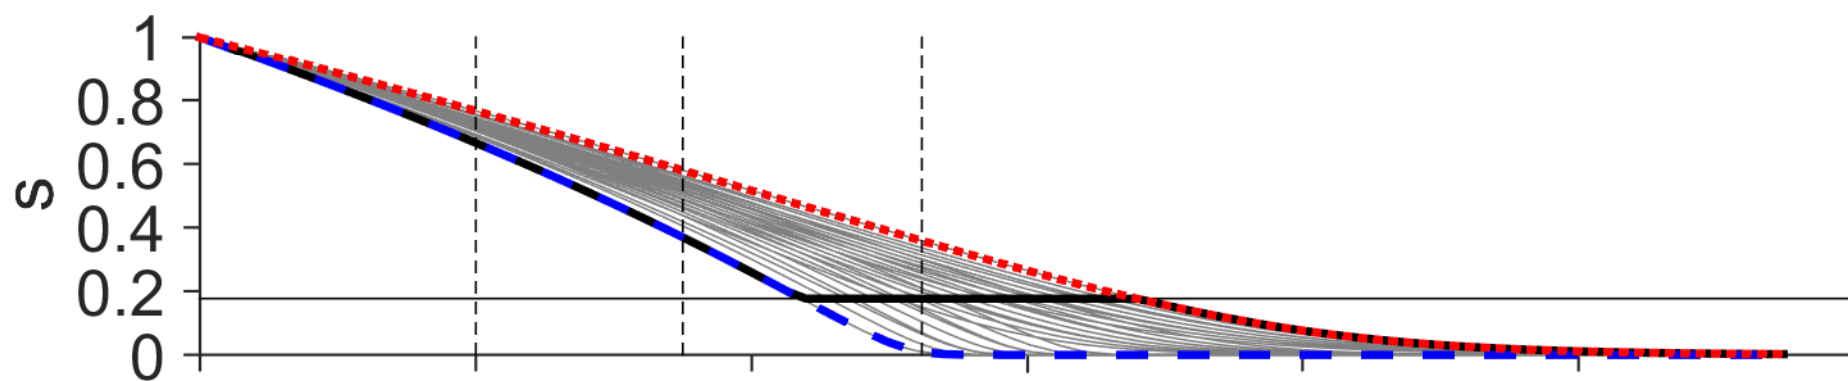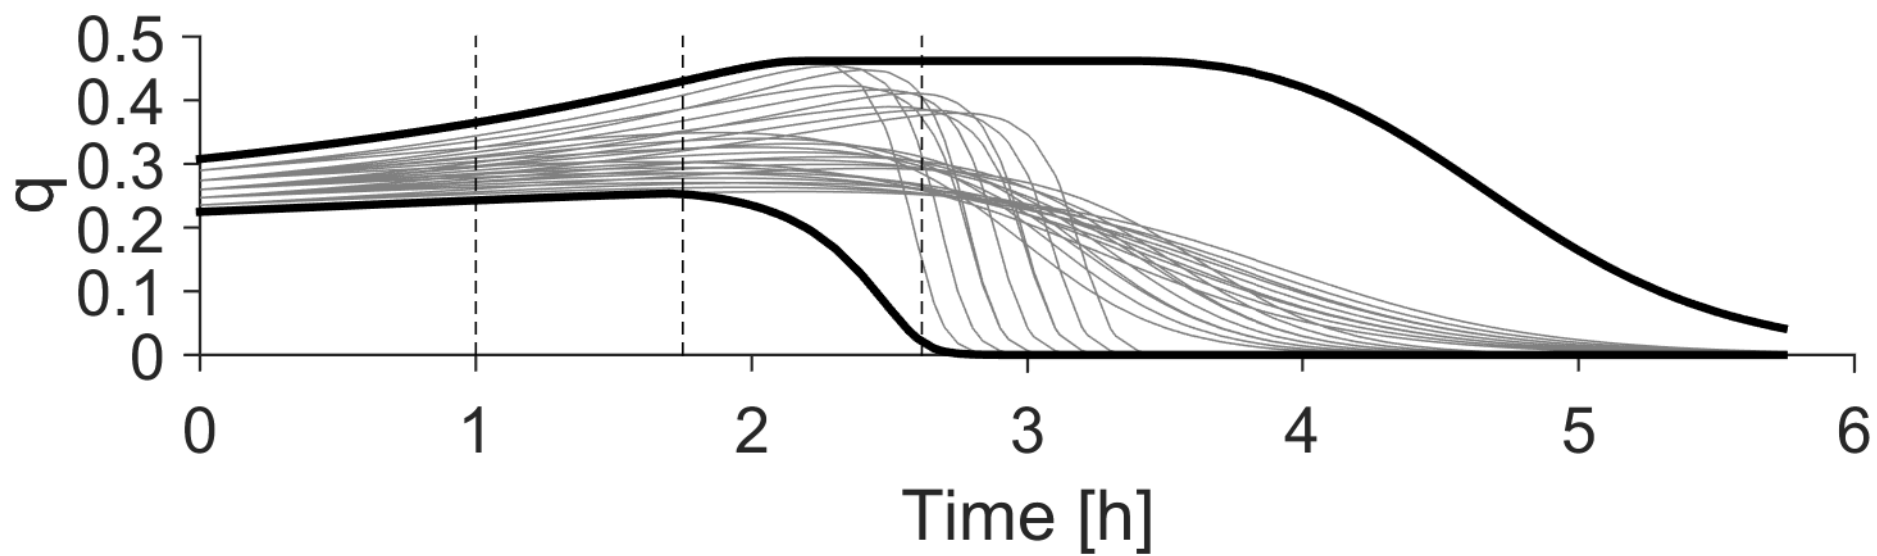

Supplement: s1 [file s1]

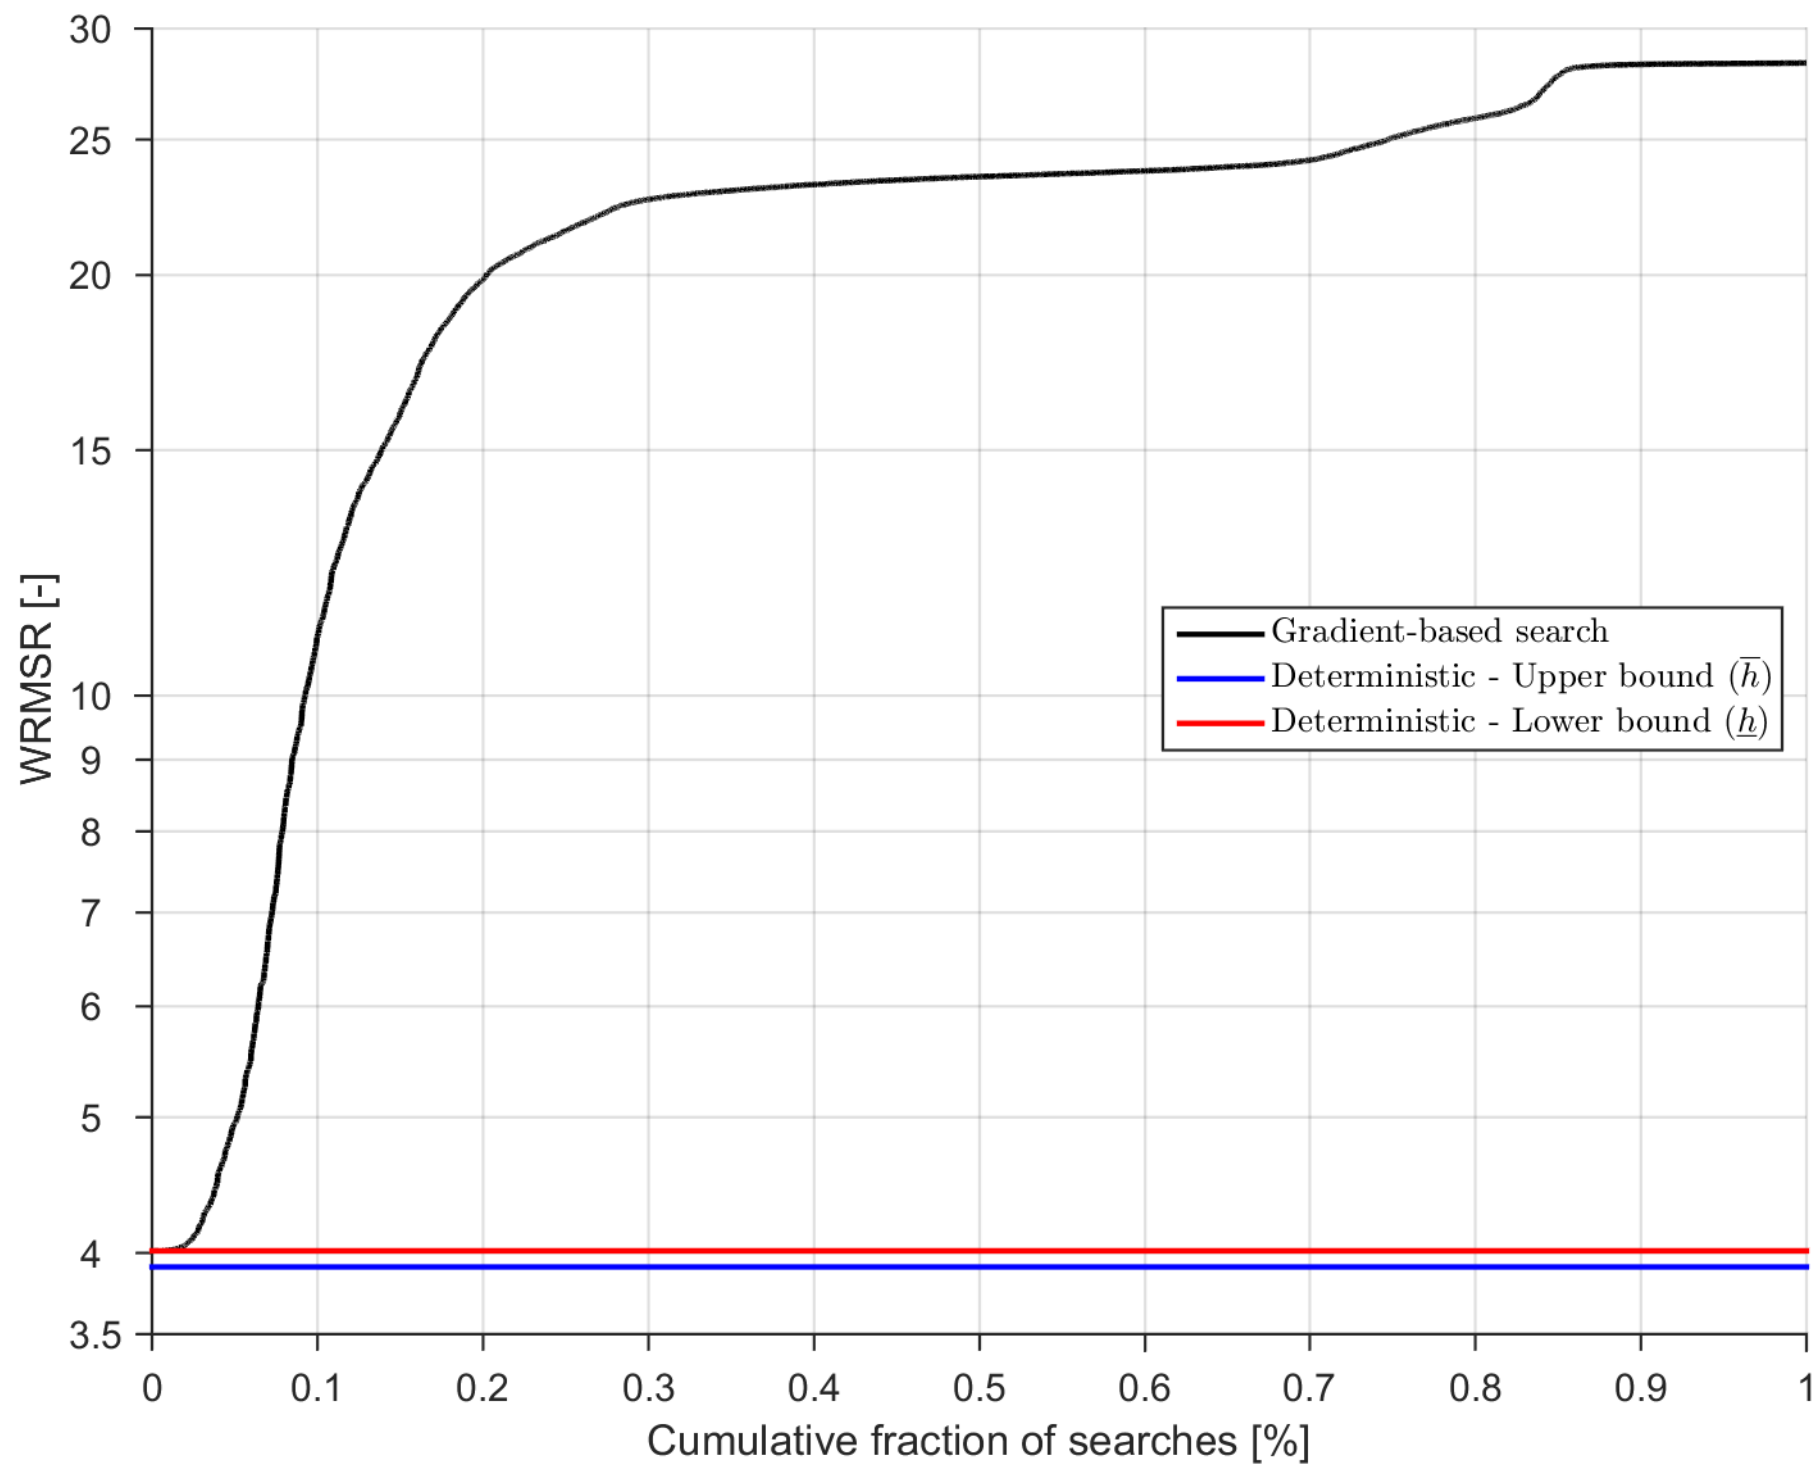

Supplement: s1 [file s1]

Rate law 1: Zero-Order

Rate law 2: Tessier

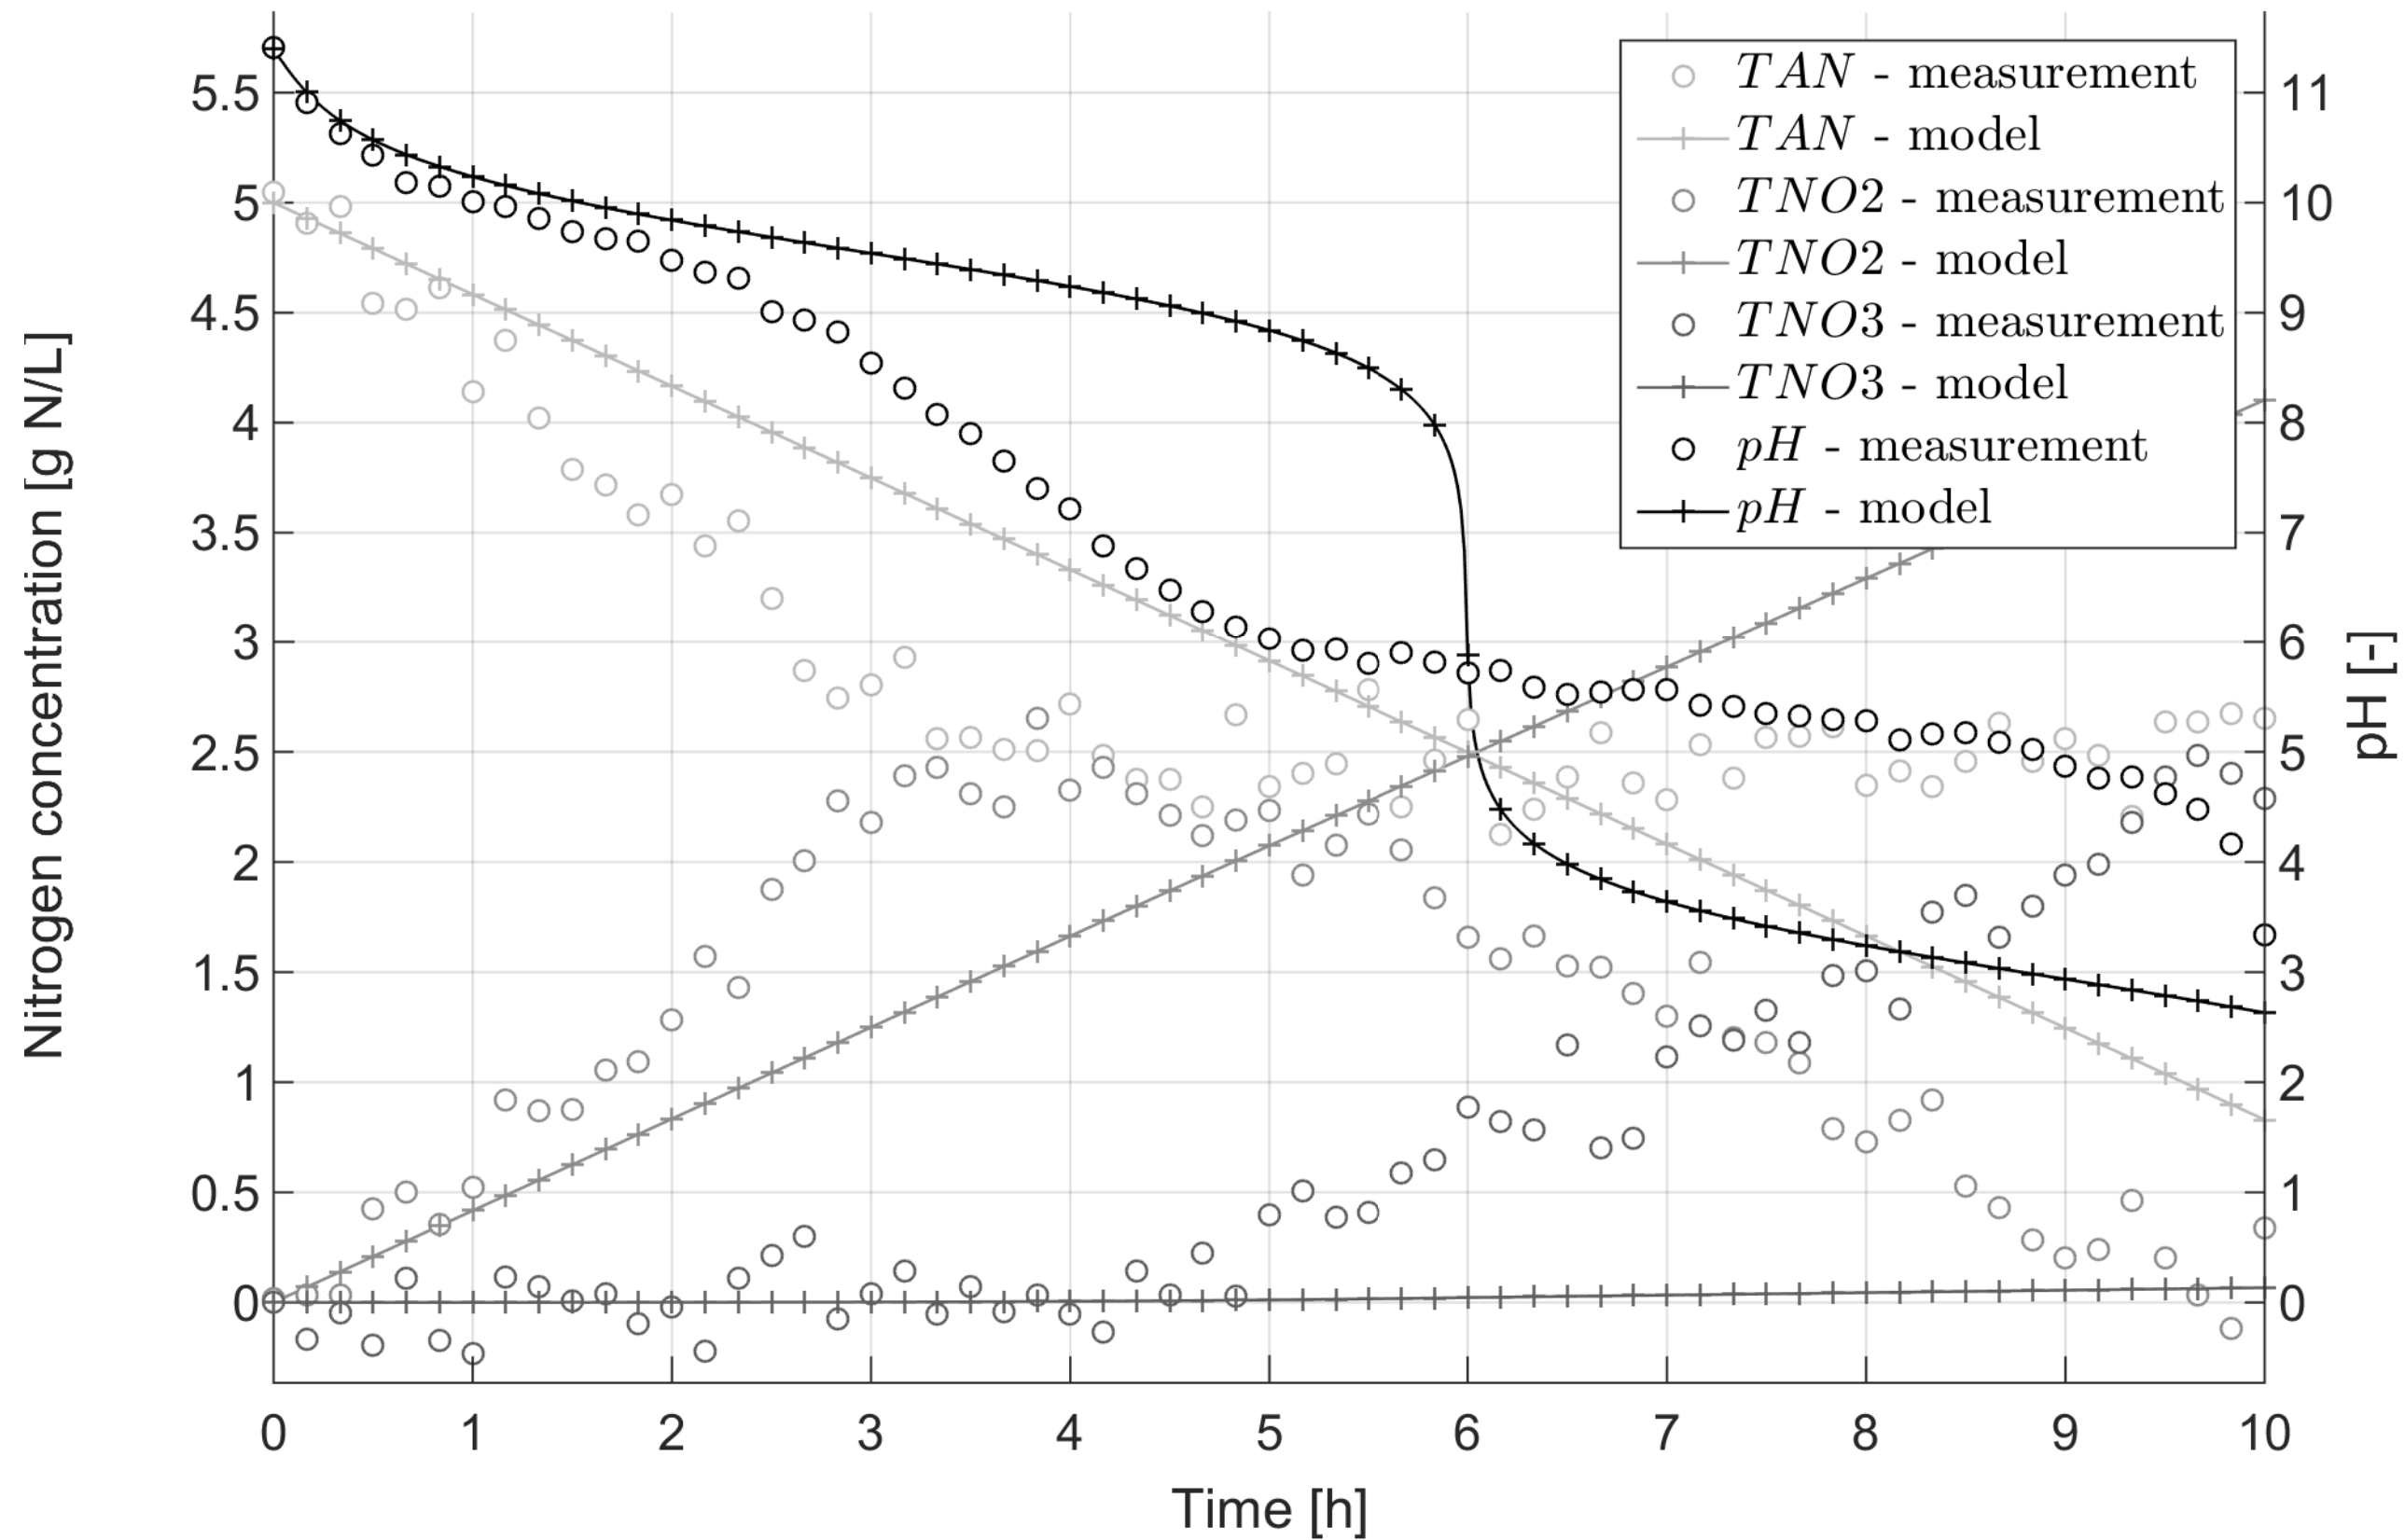

Supplement: s1 [file s1]

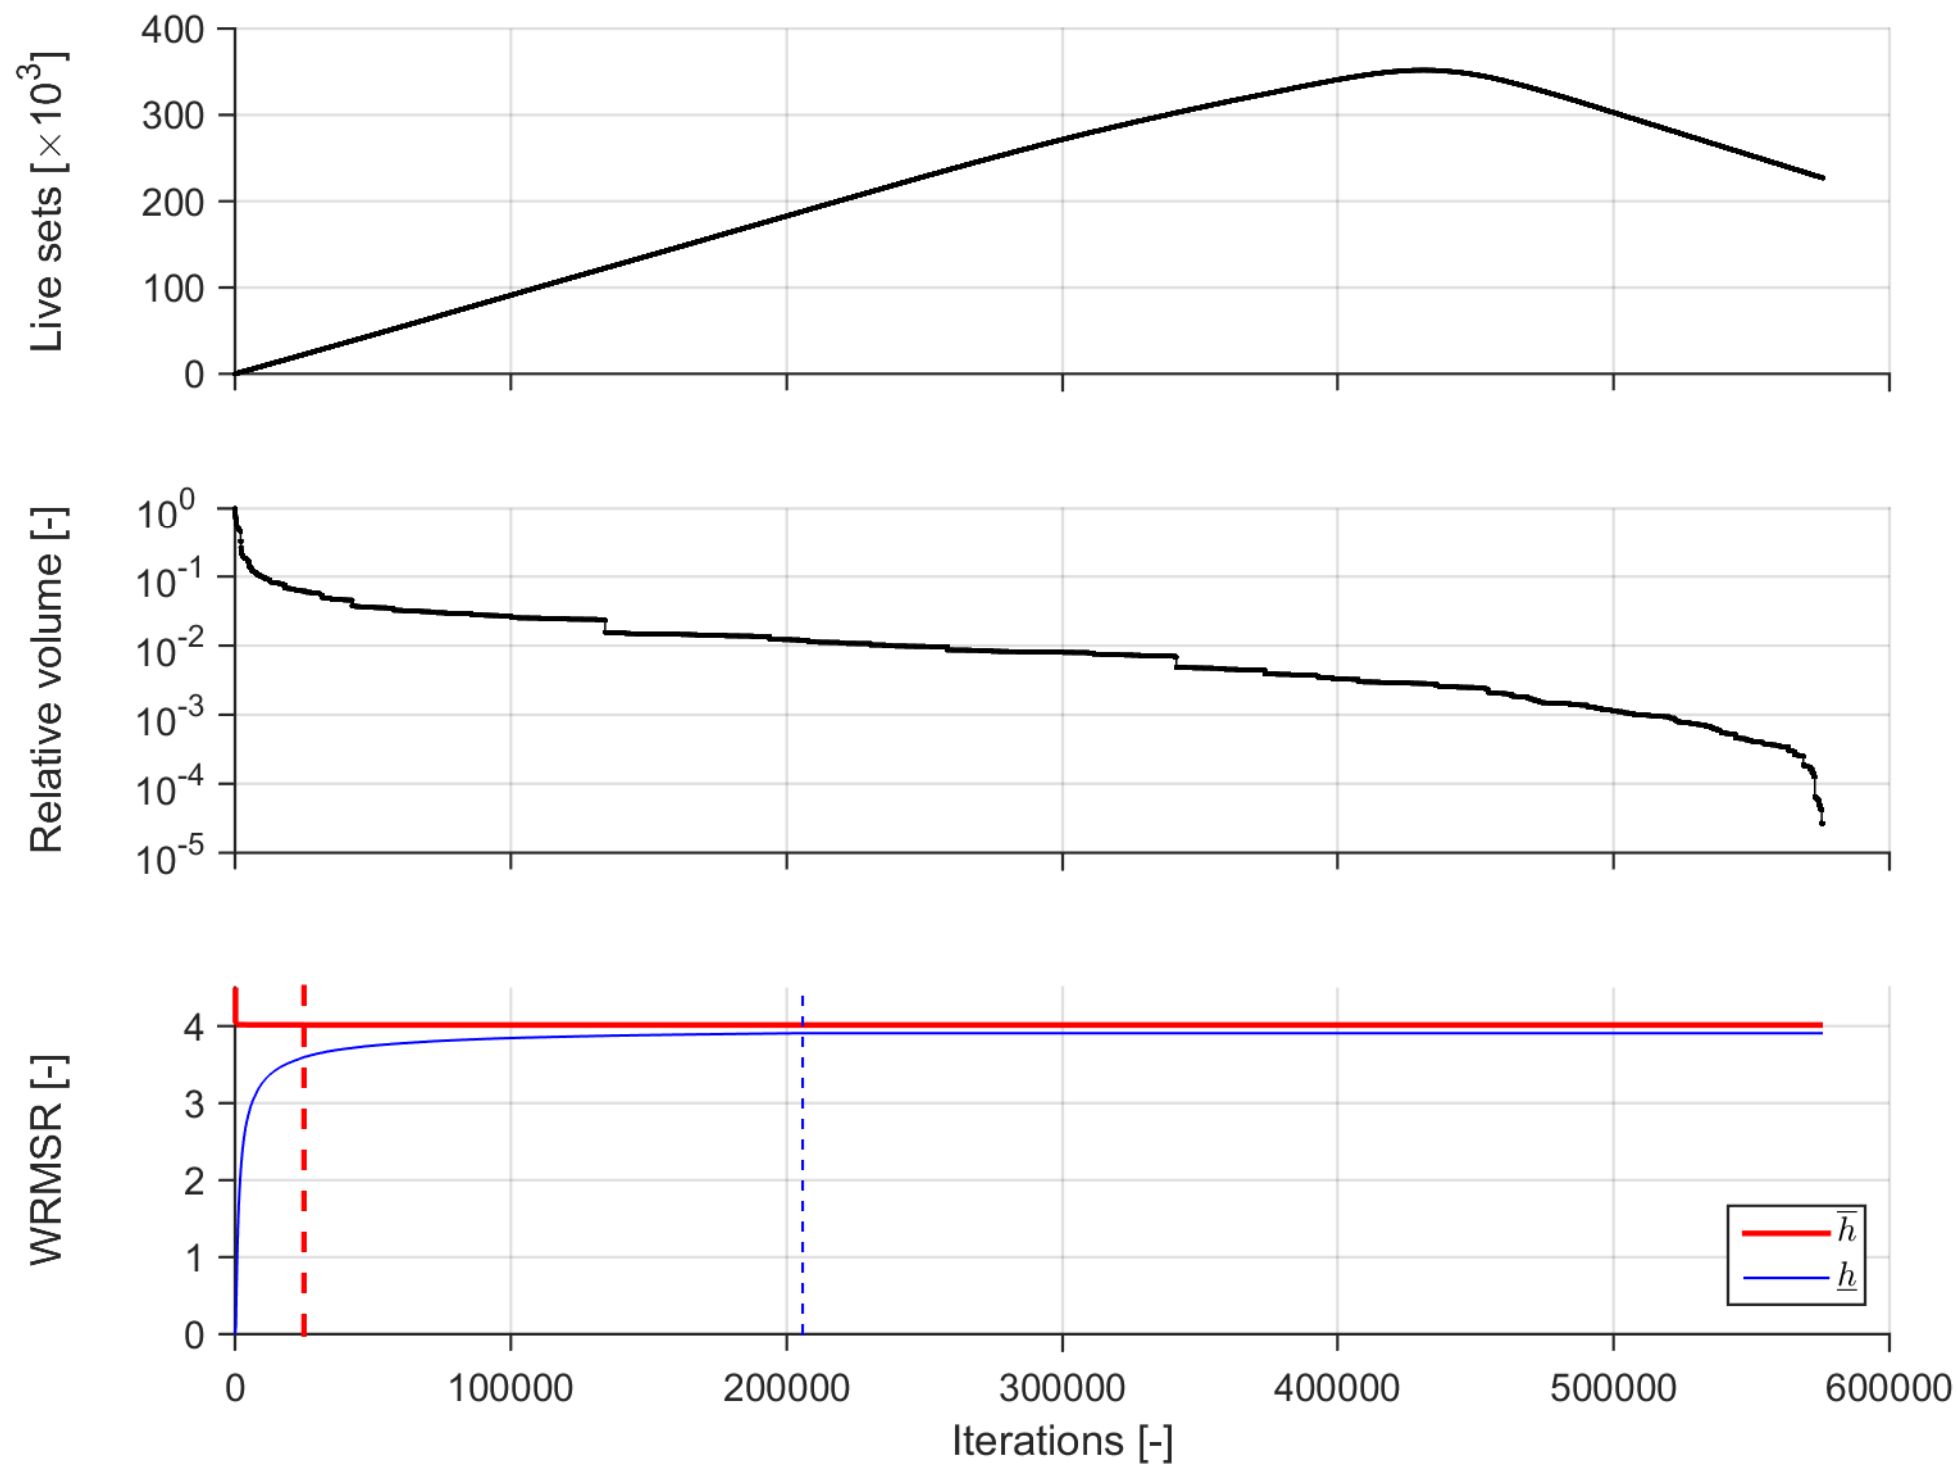

Supplement: s1 [file s1]

Rate law 1: Haldane

Rate law 2: Tessier

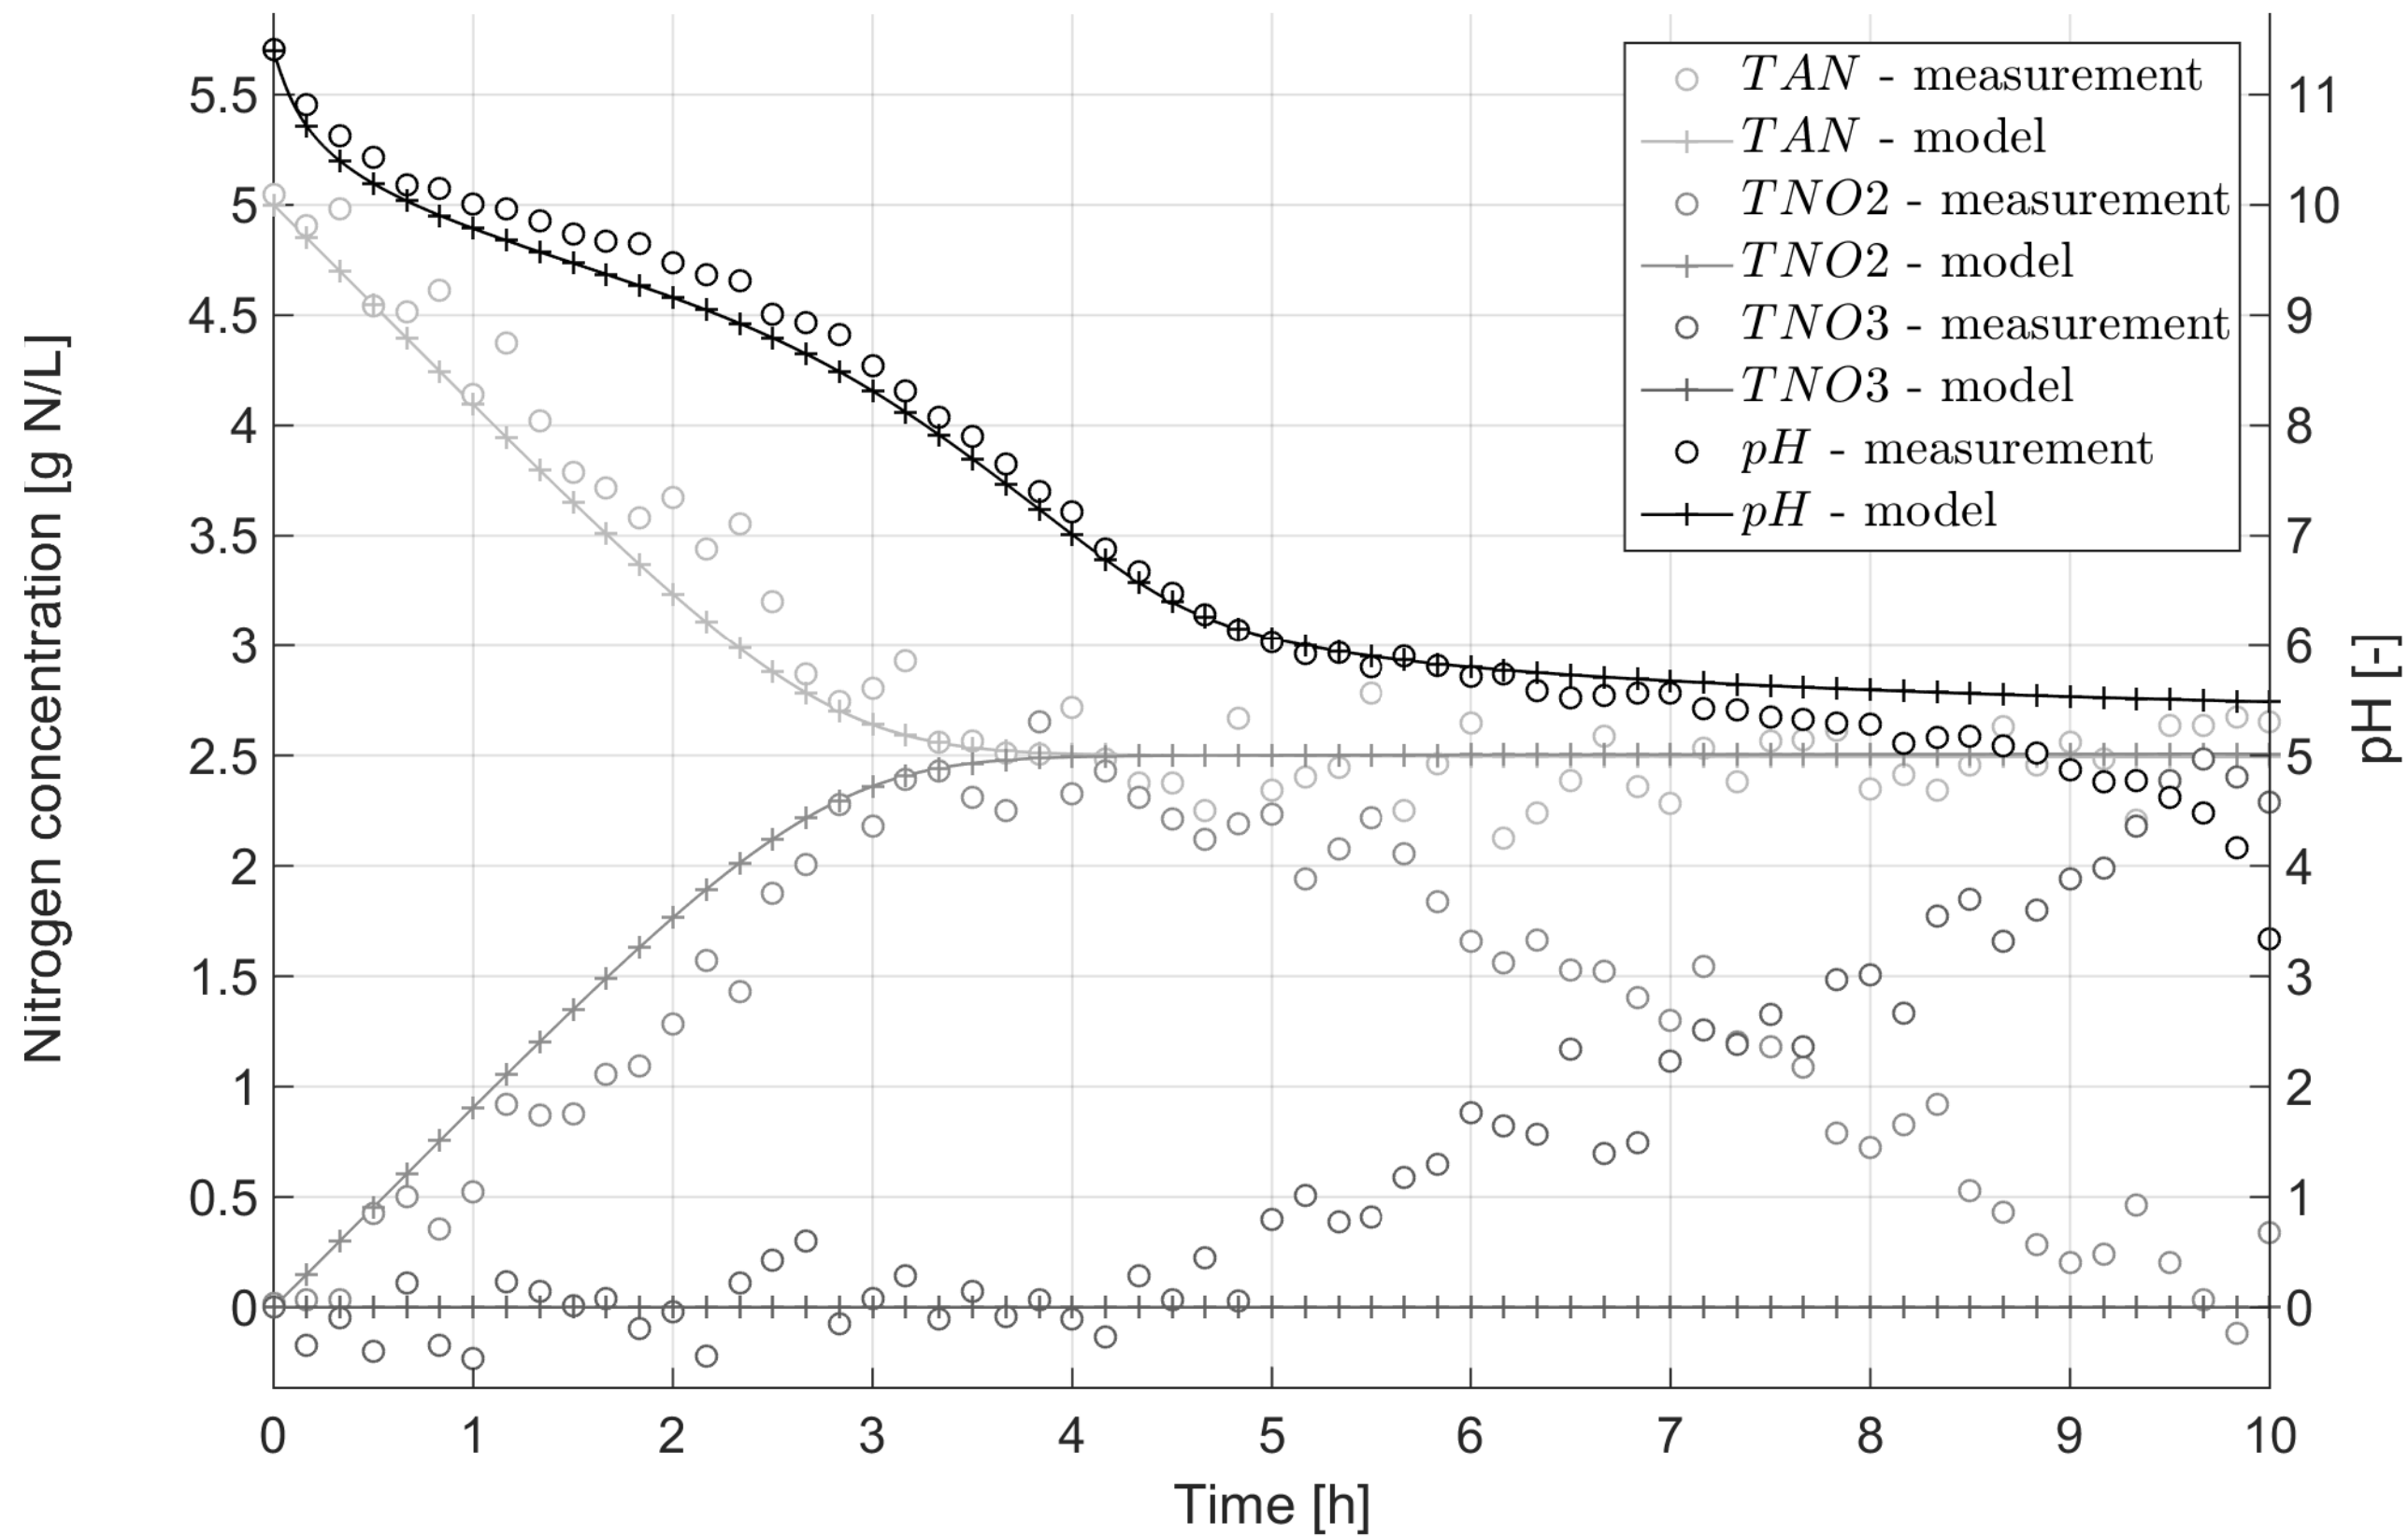

Supplement: s1 [file s1]

**Rate law 1: Zero-Order**  
**Rate law 2: Zero-Order**

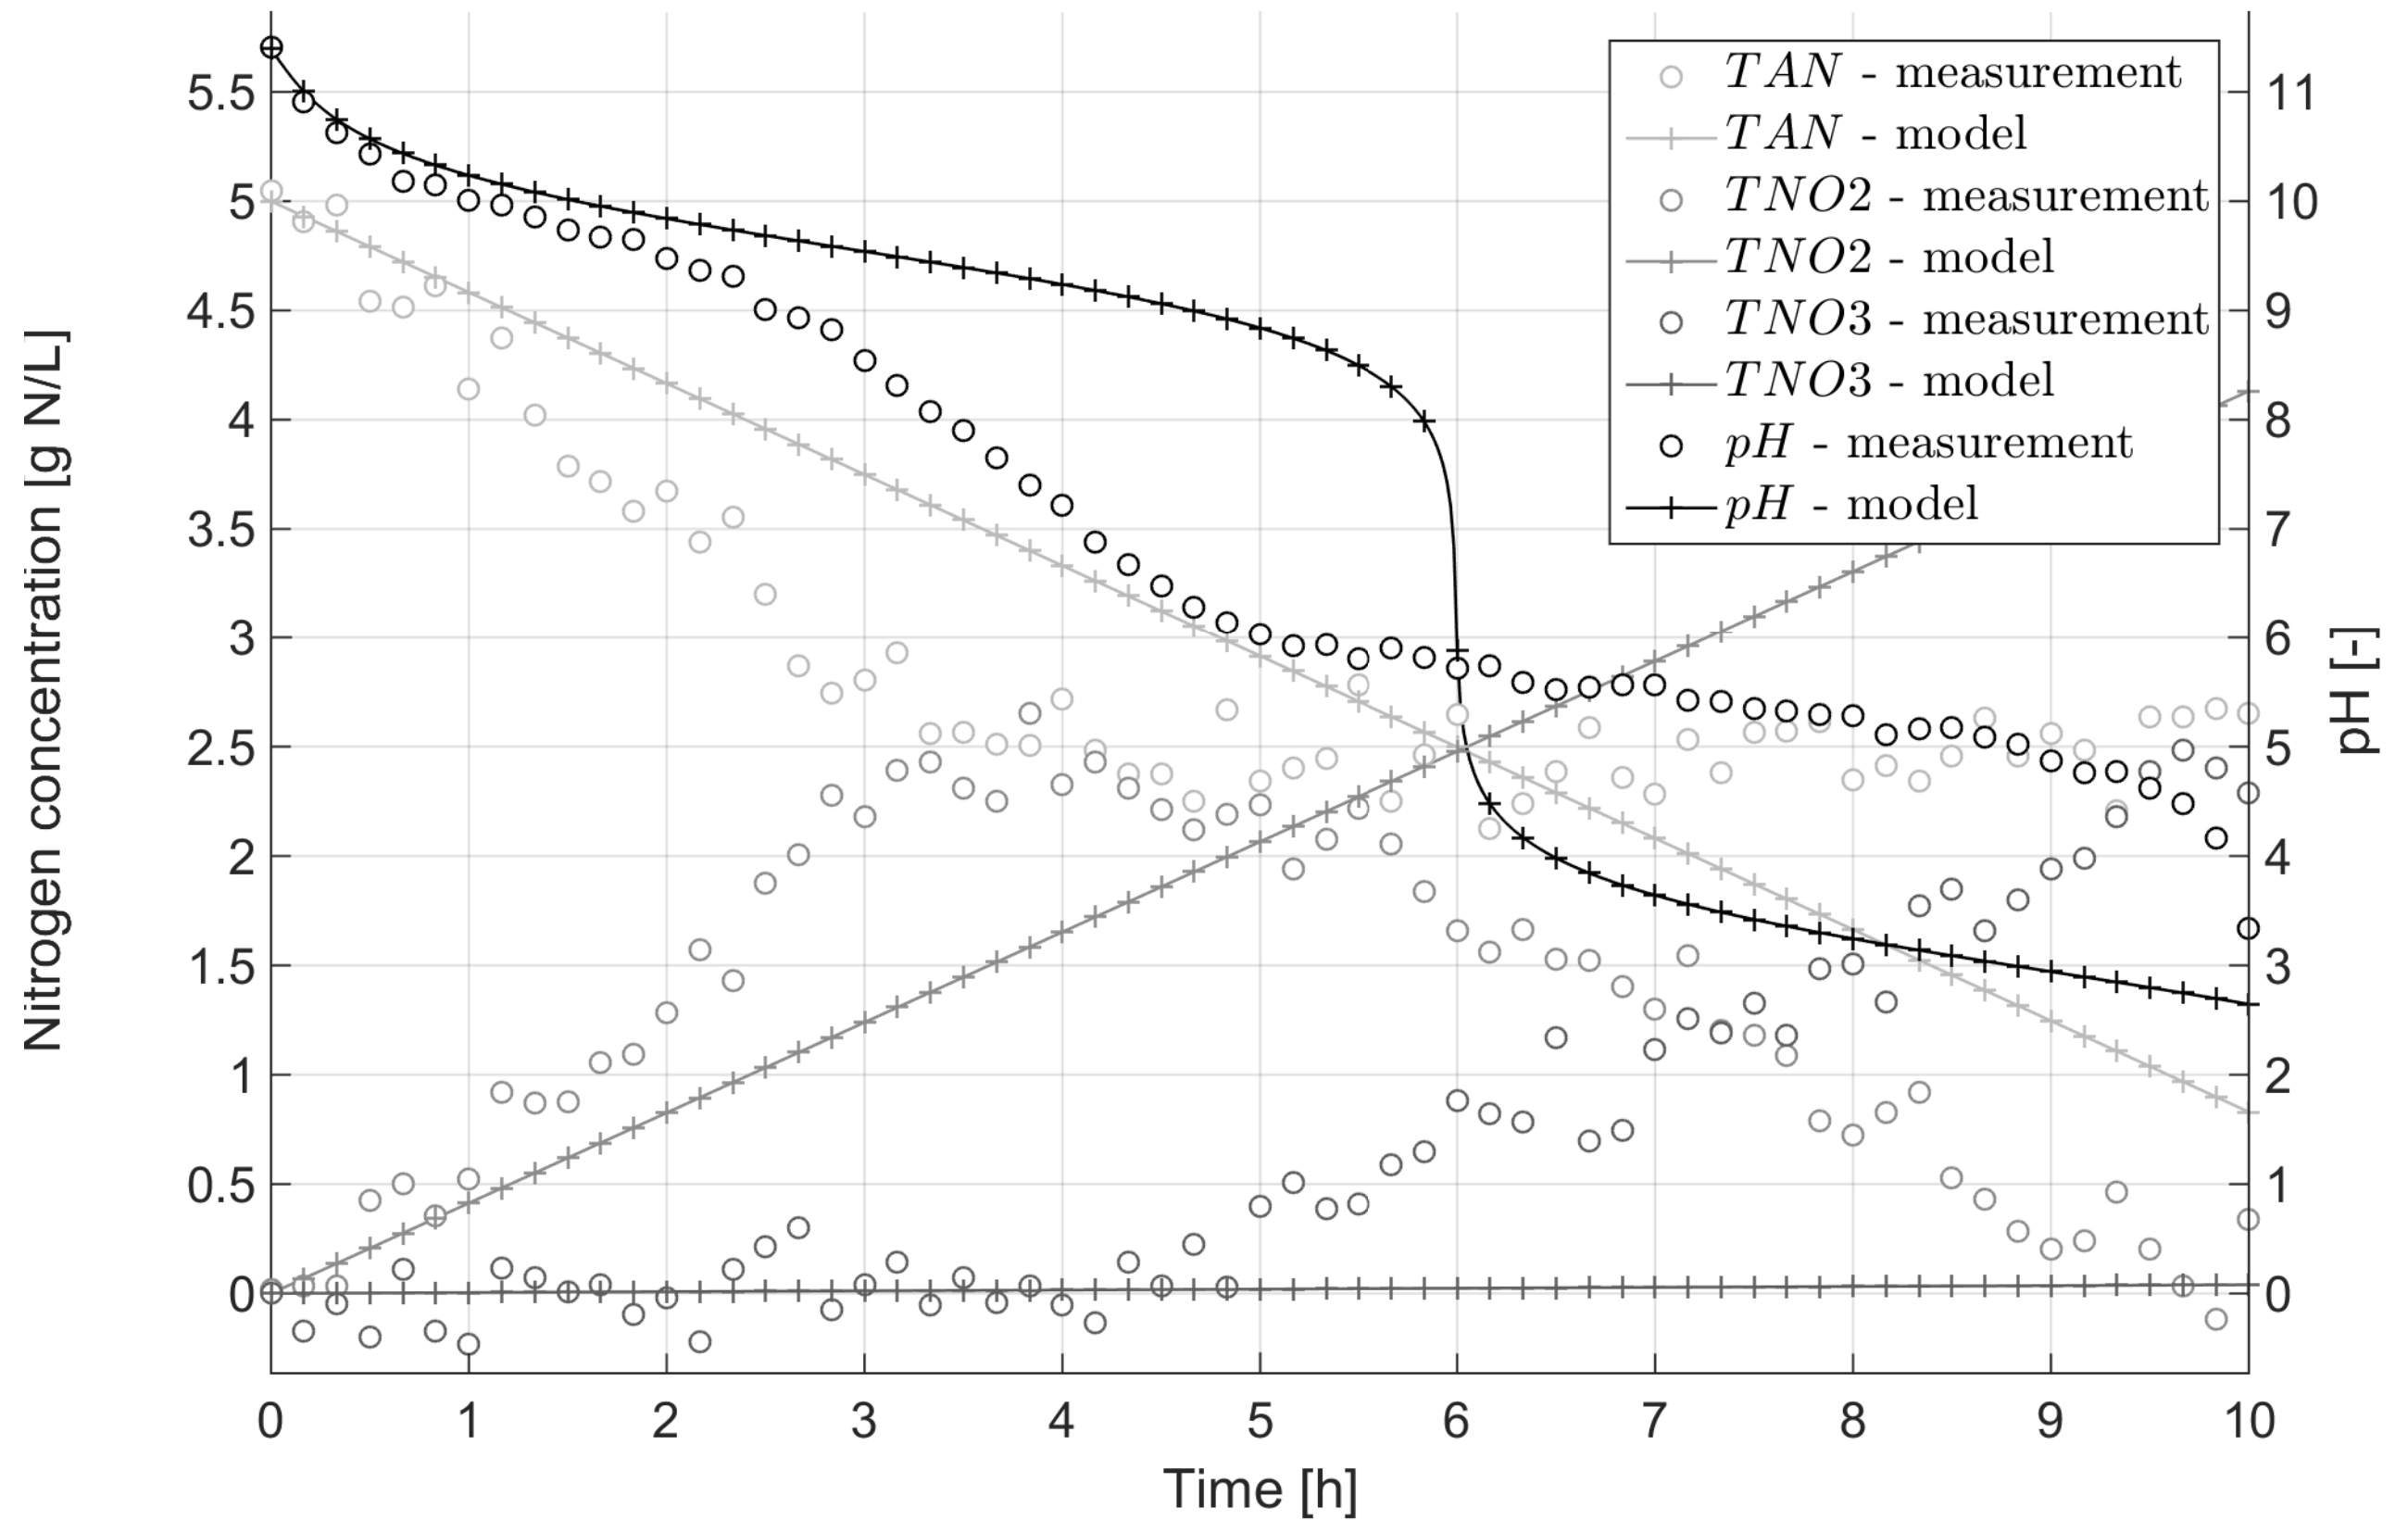

Supplement: s1 [file s1]

Rate law 1: First-Order

Rate law 2: Monod

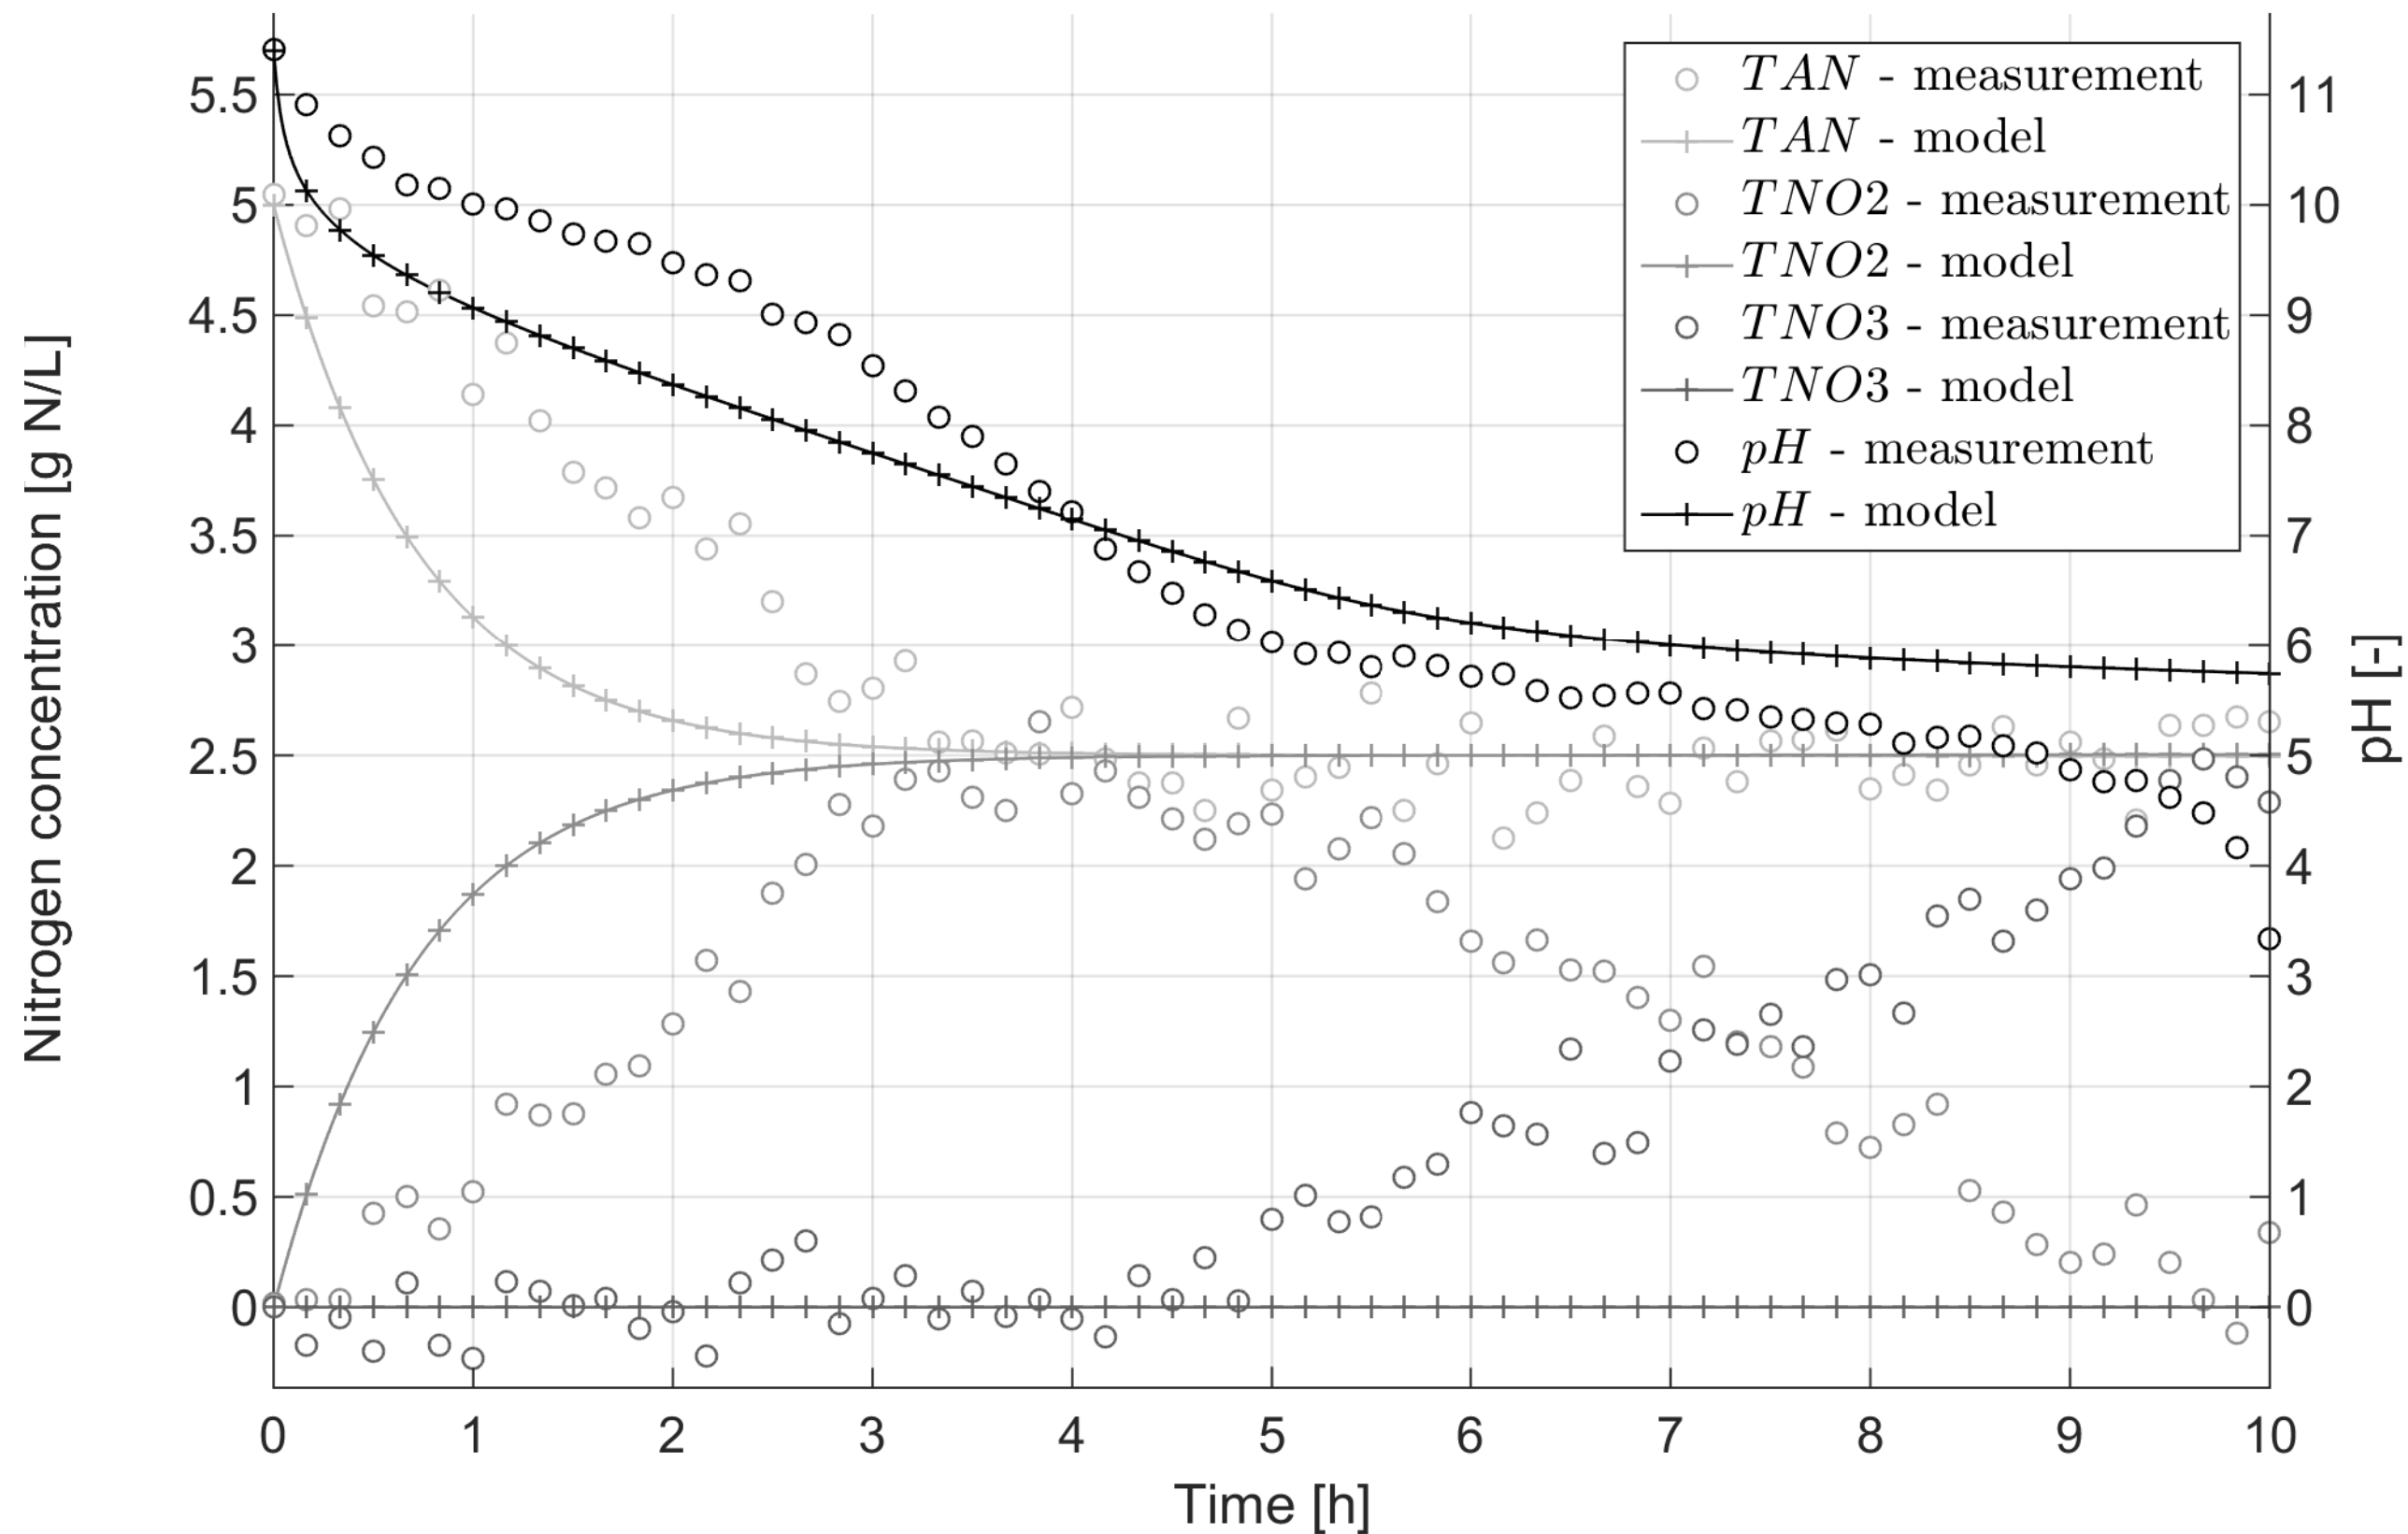

Supplement: s1 [file s1]

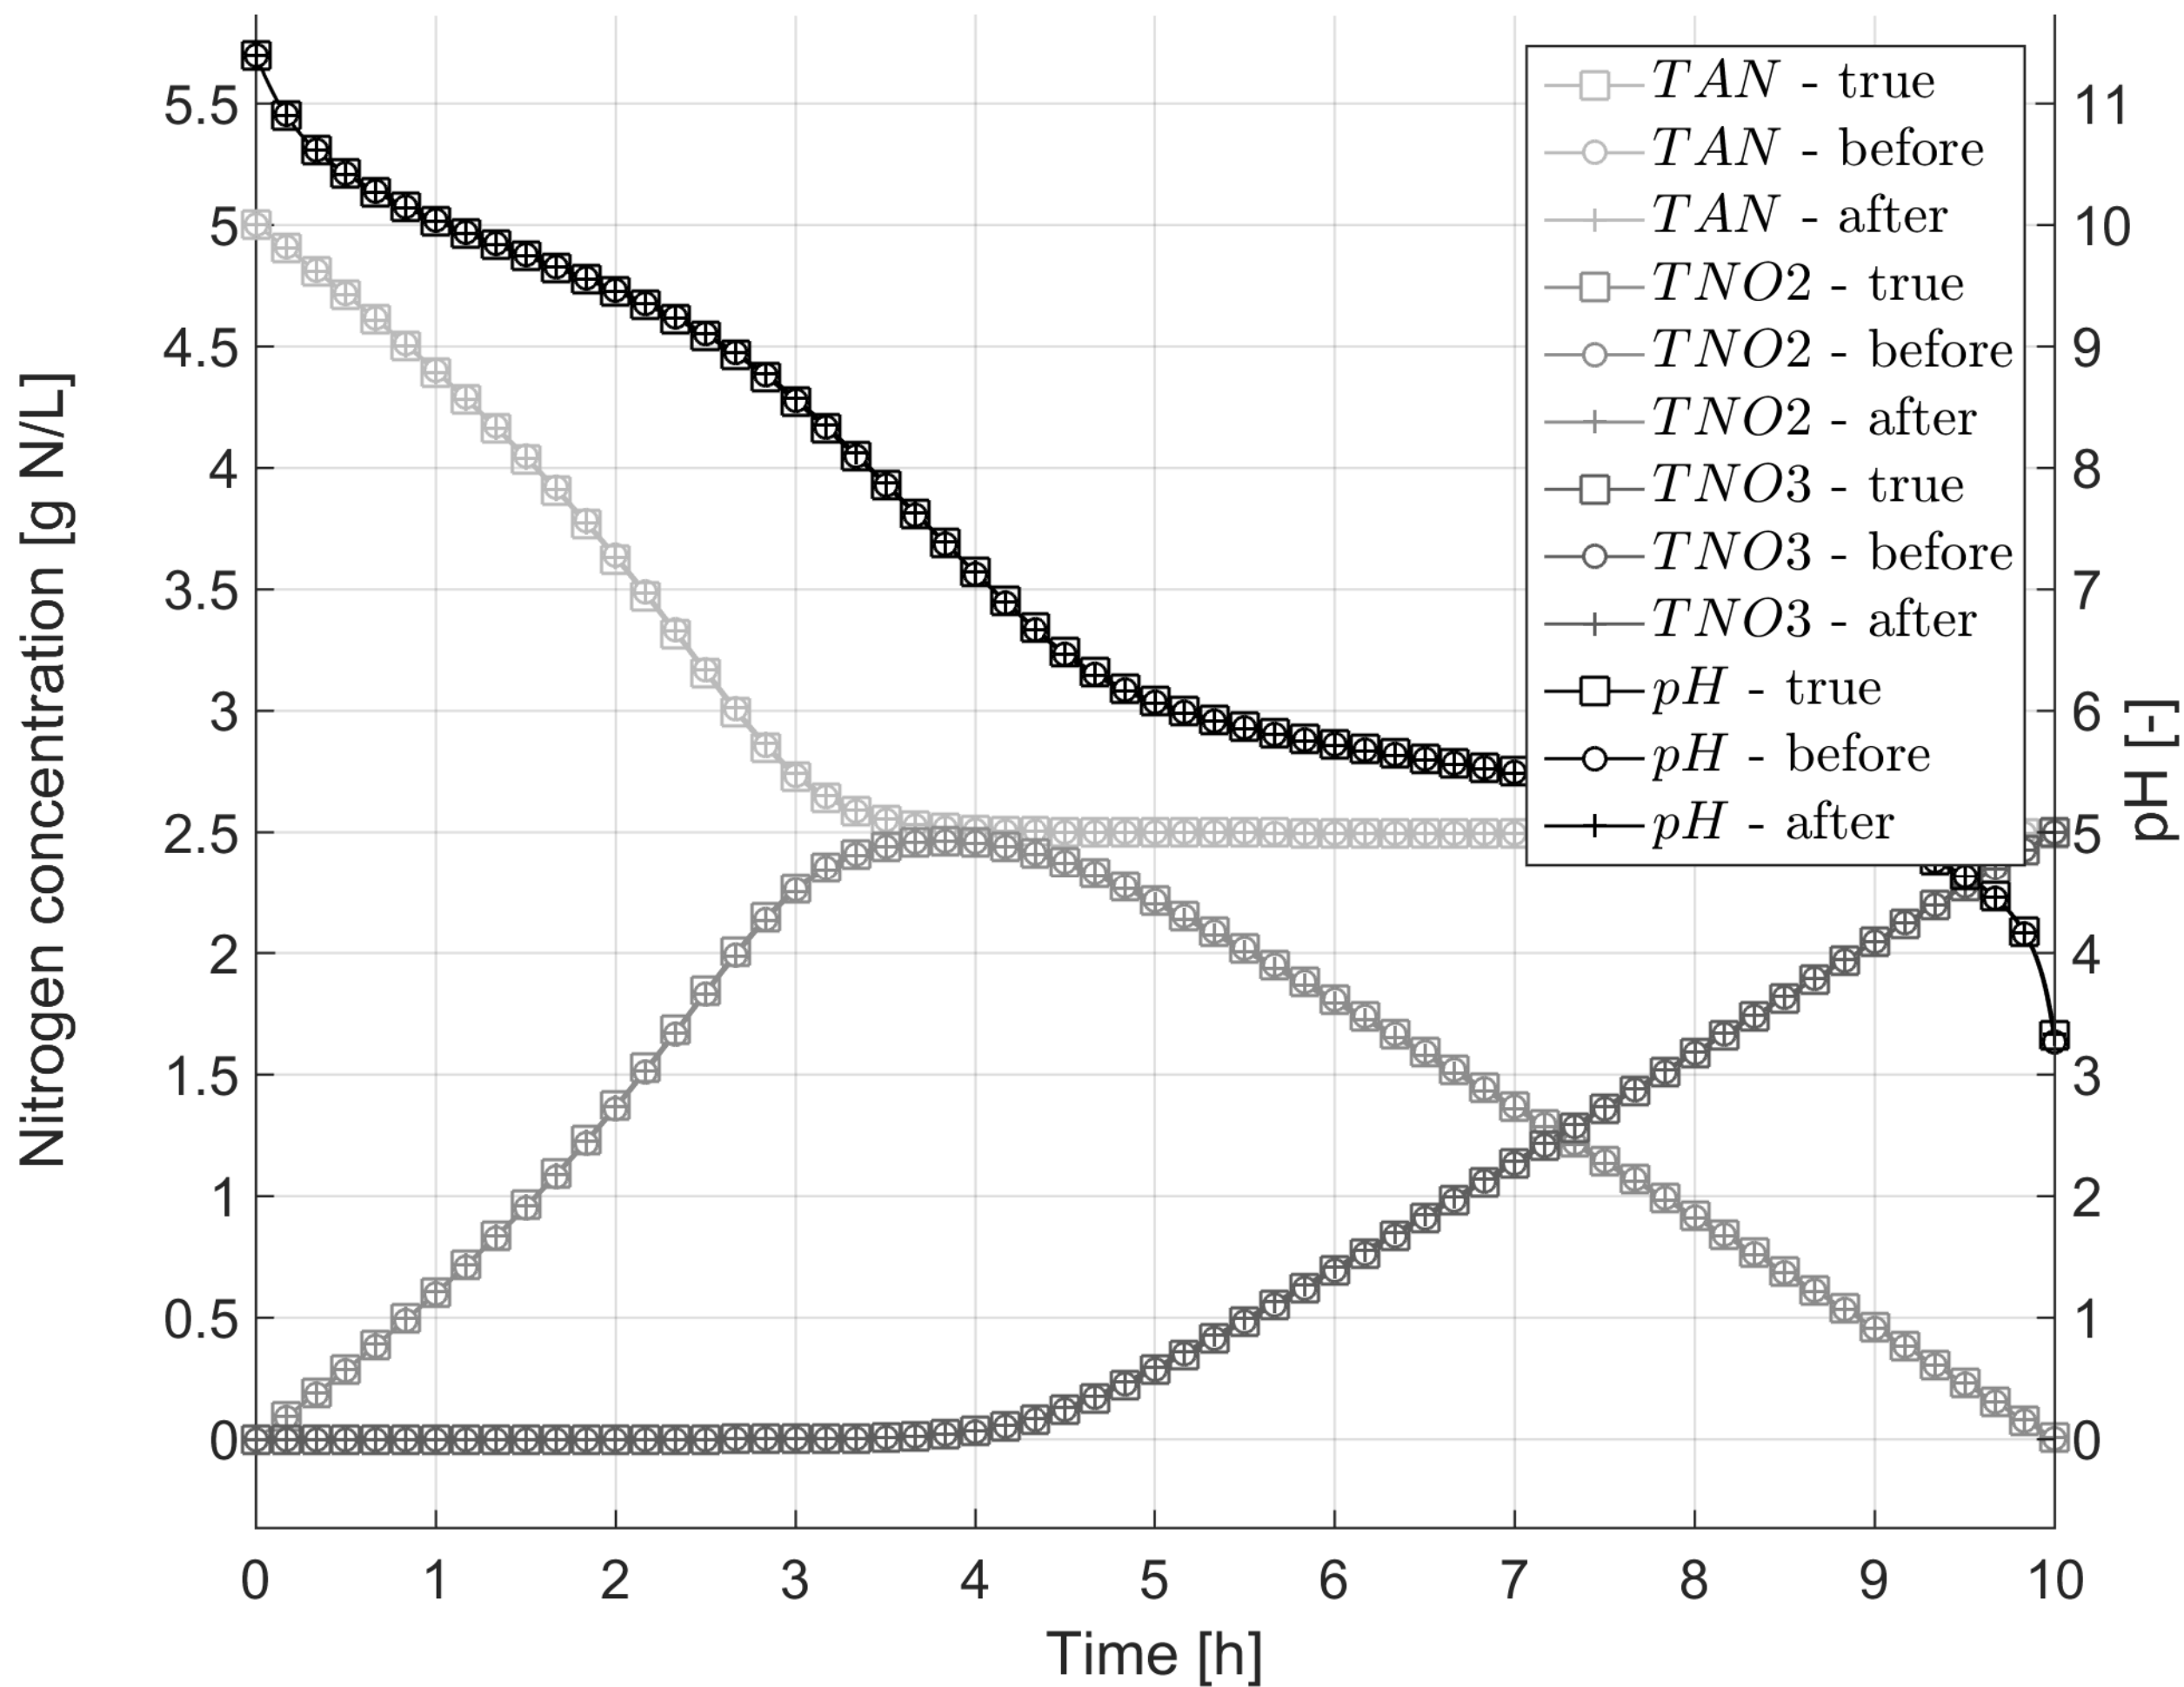

Supplement: s1 [file s1]

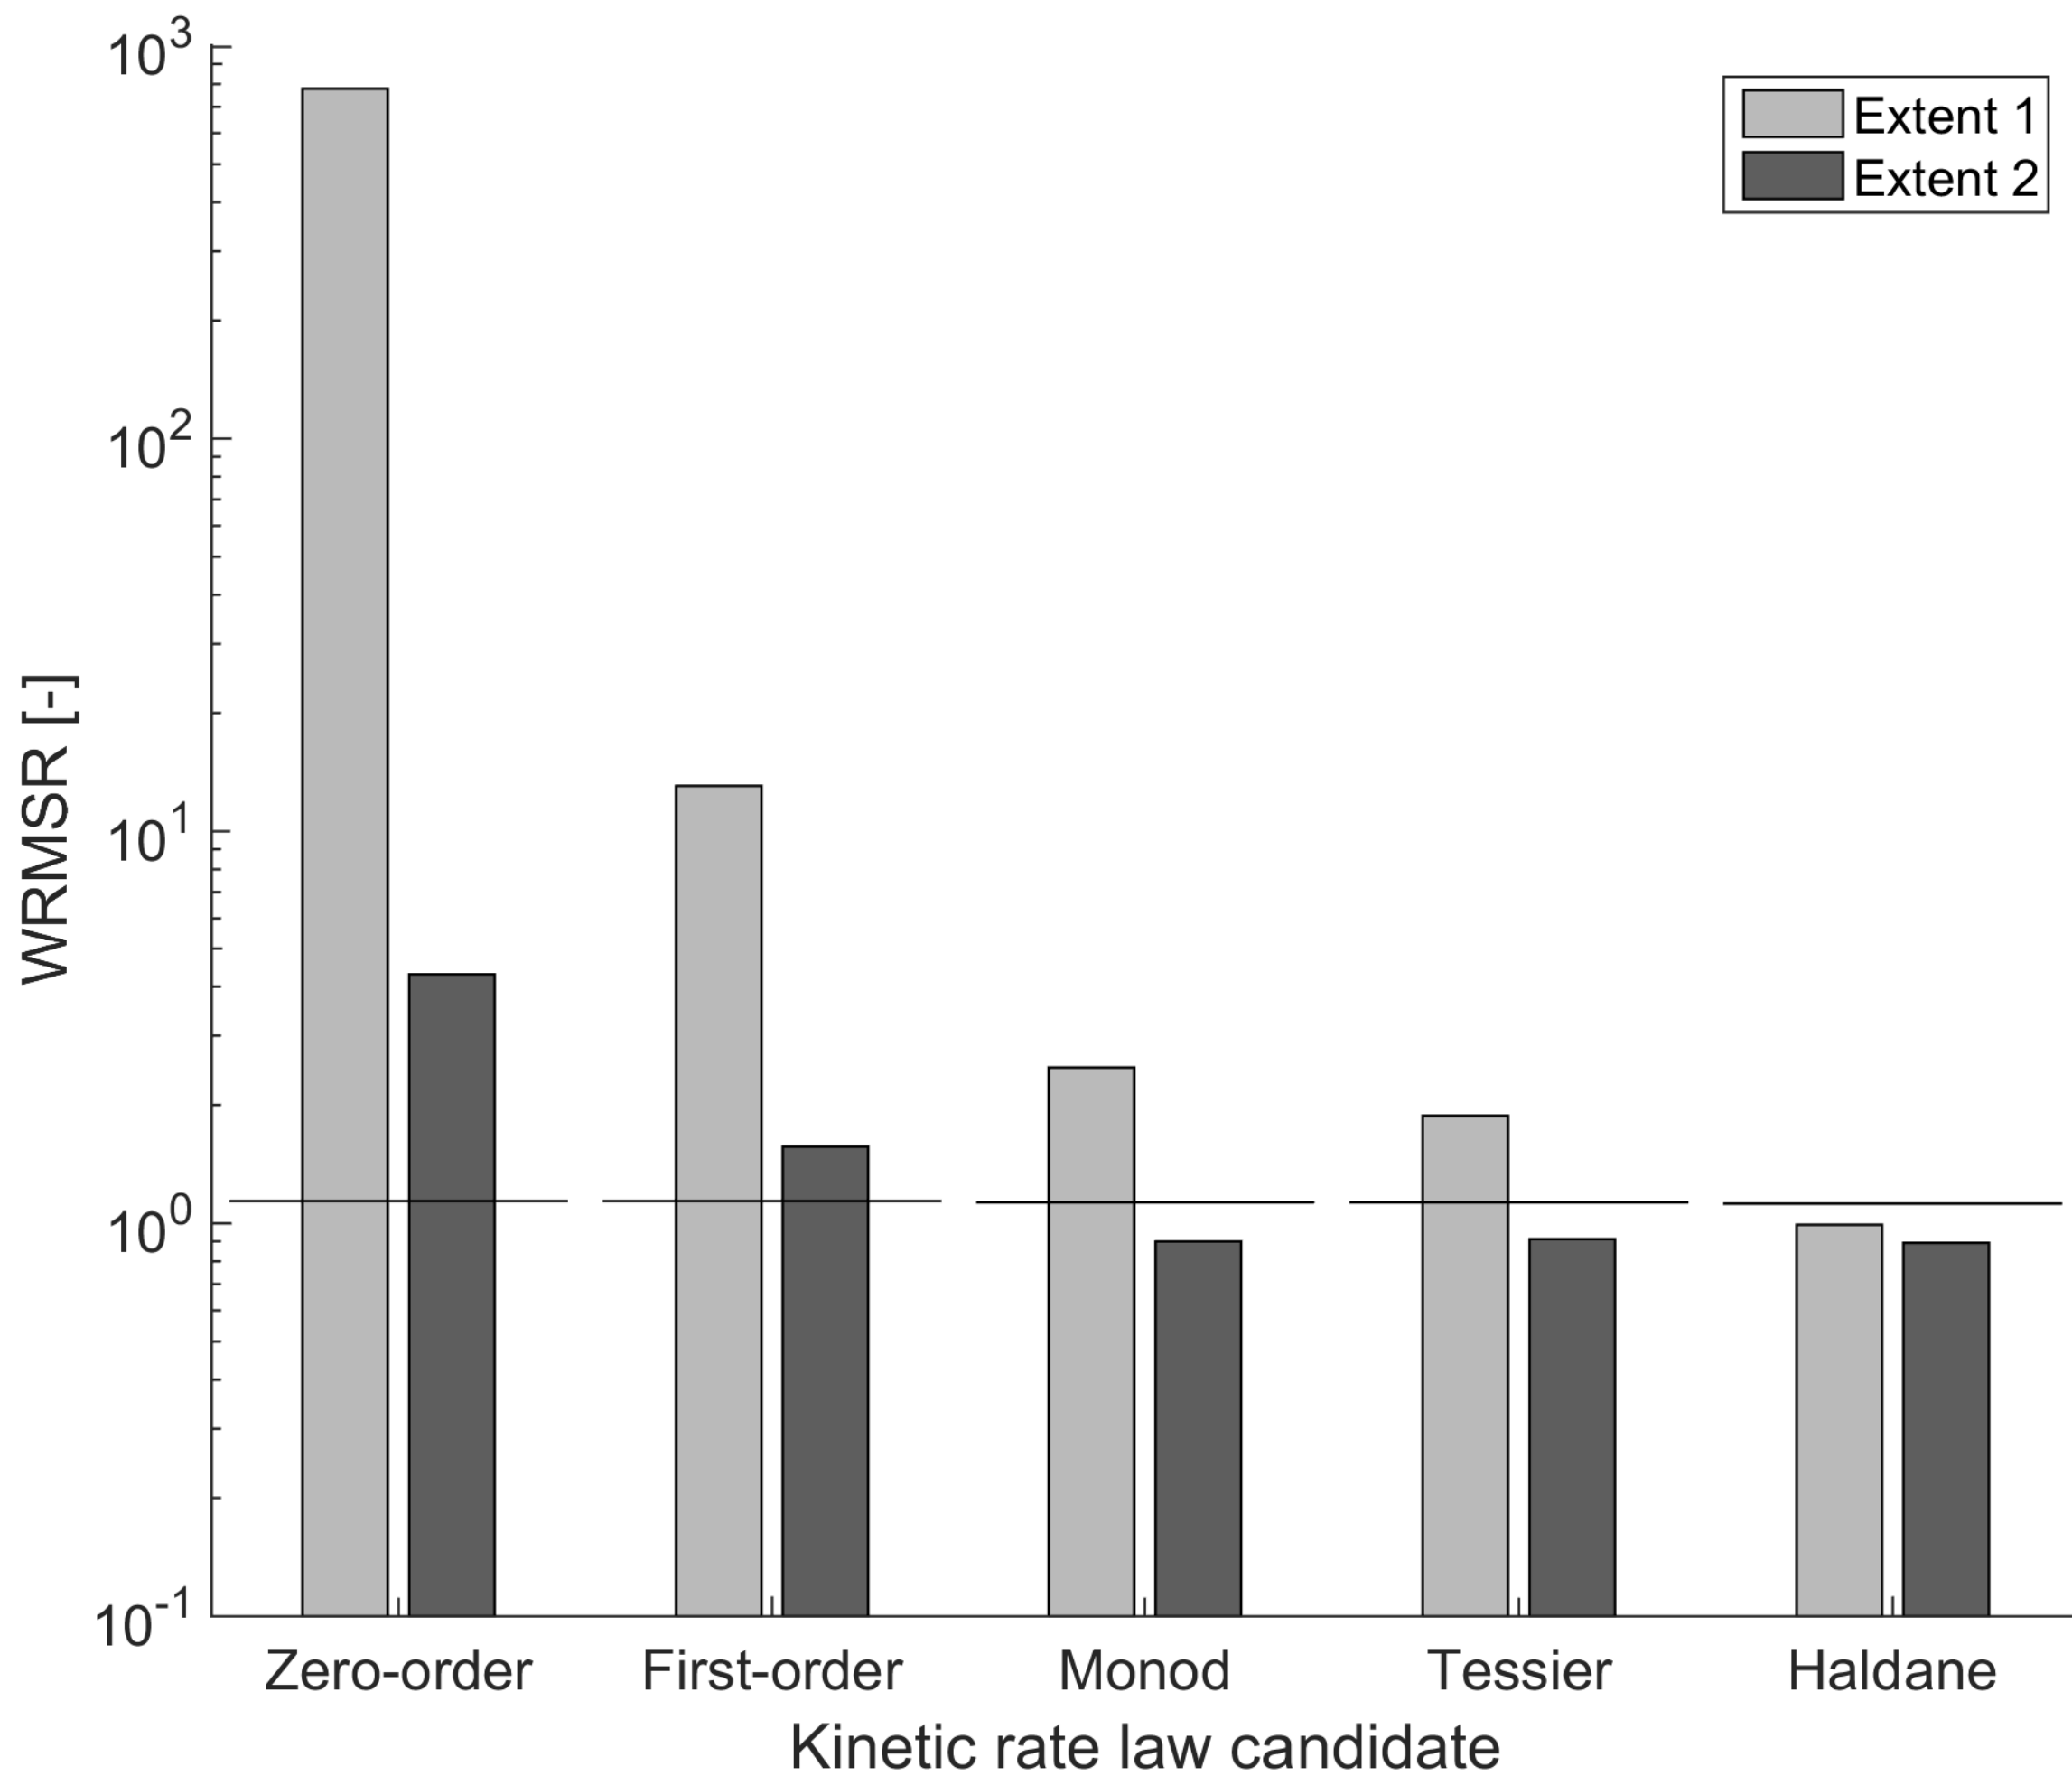

Supplement: s1 [file s1]

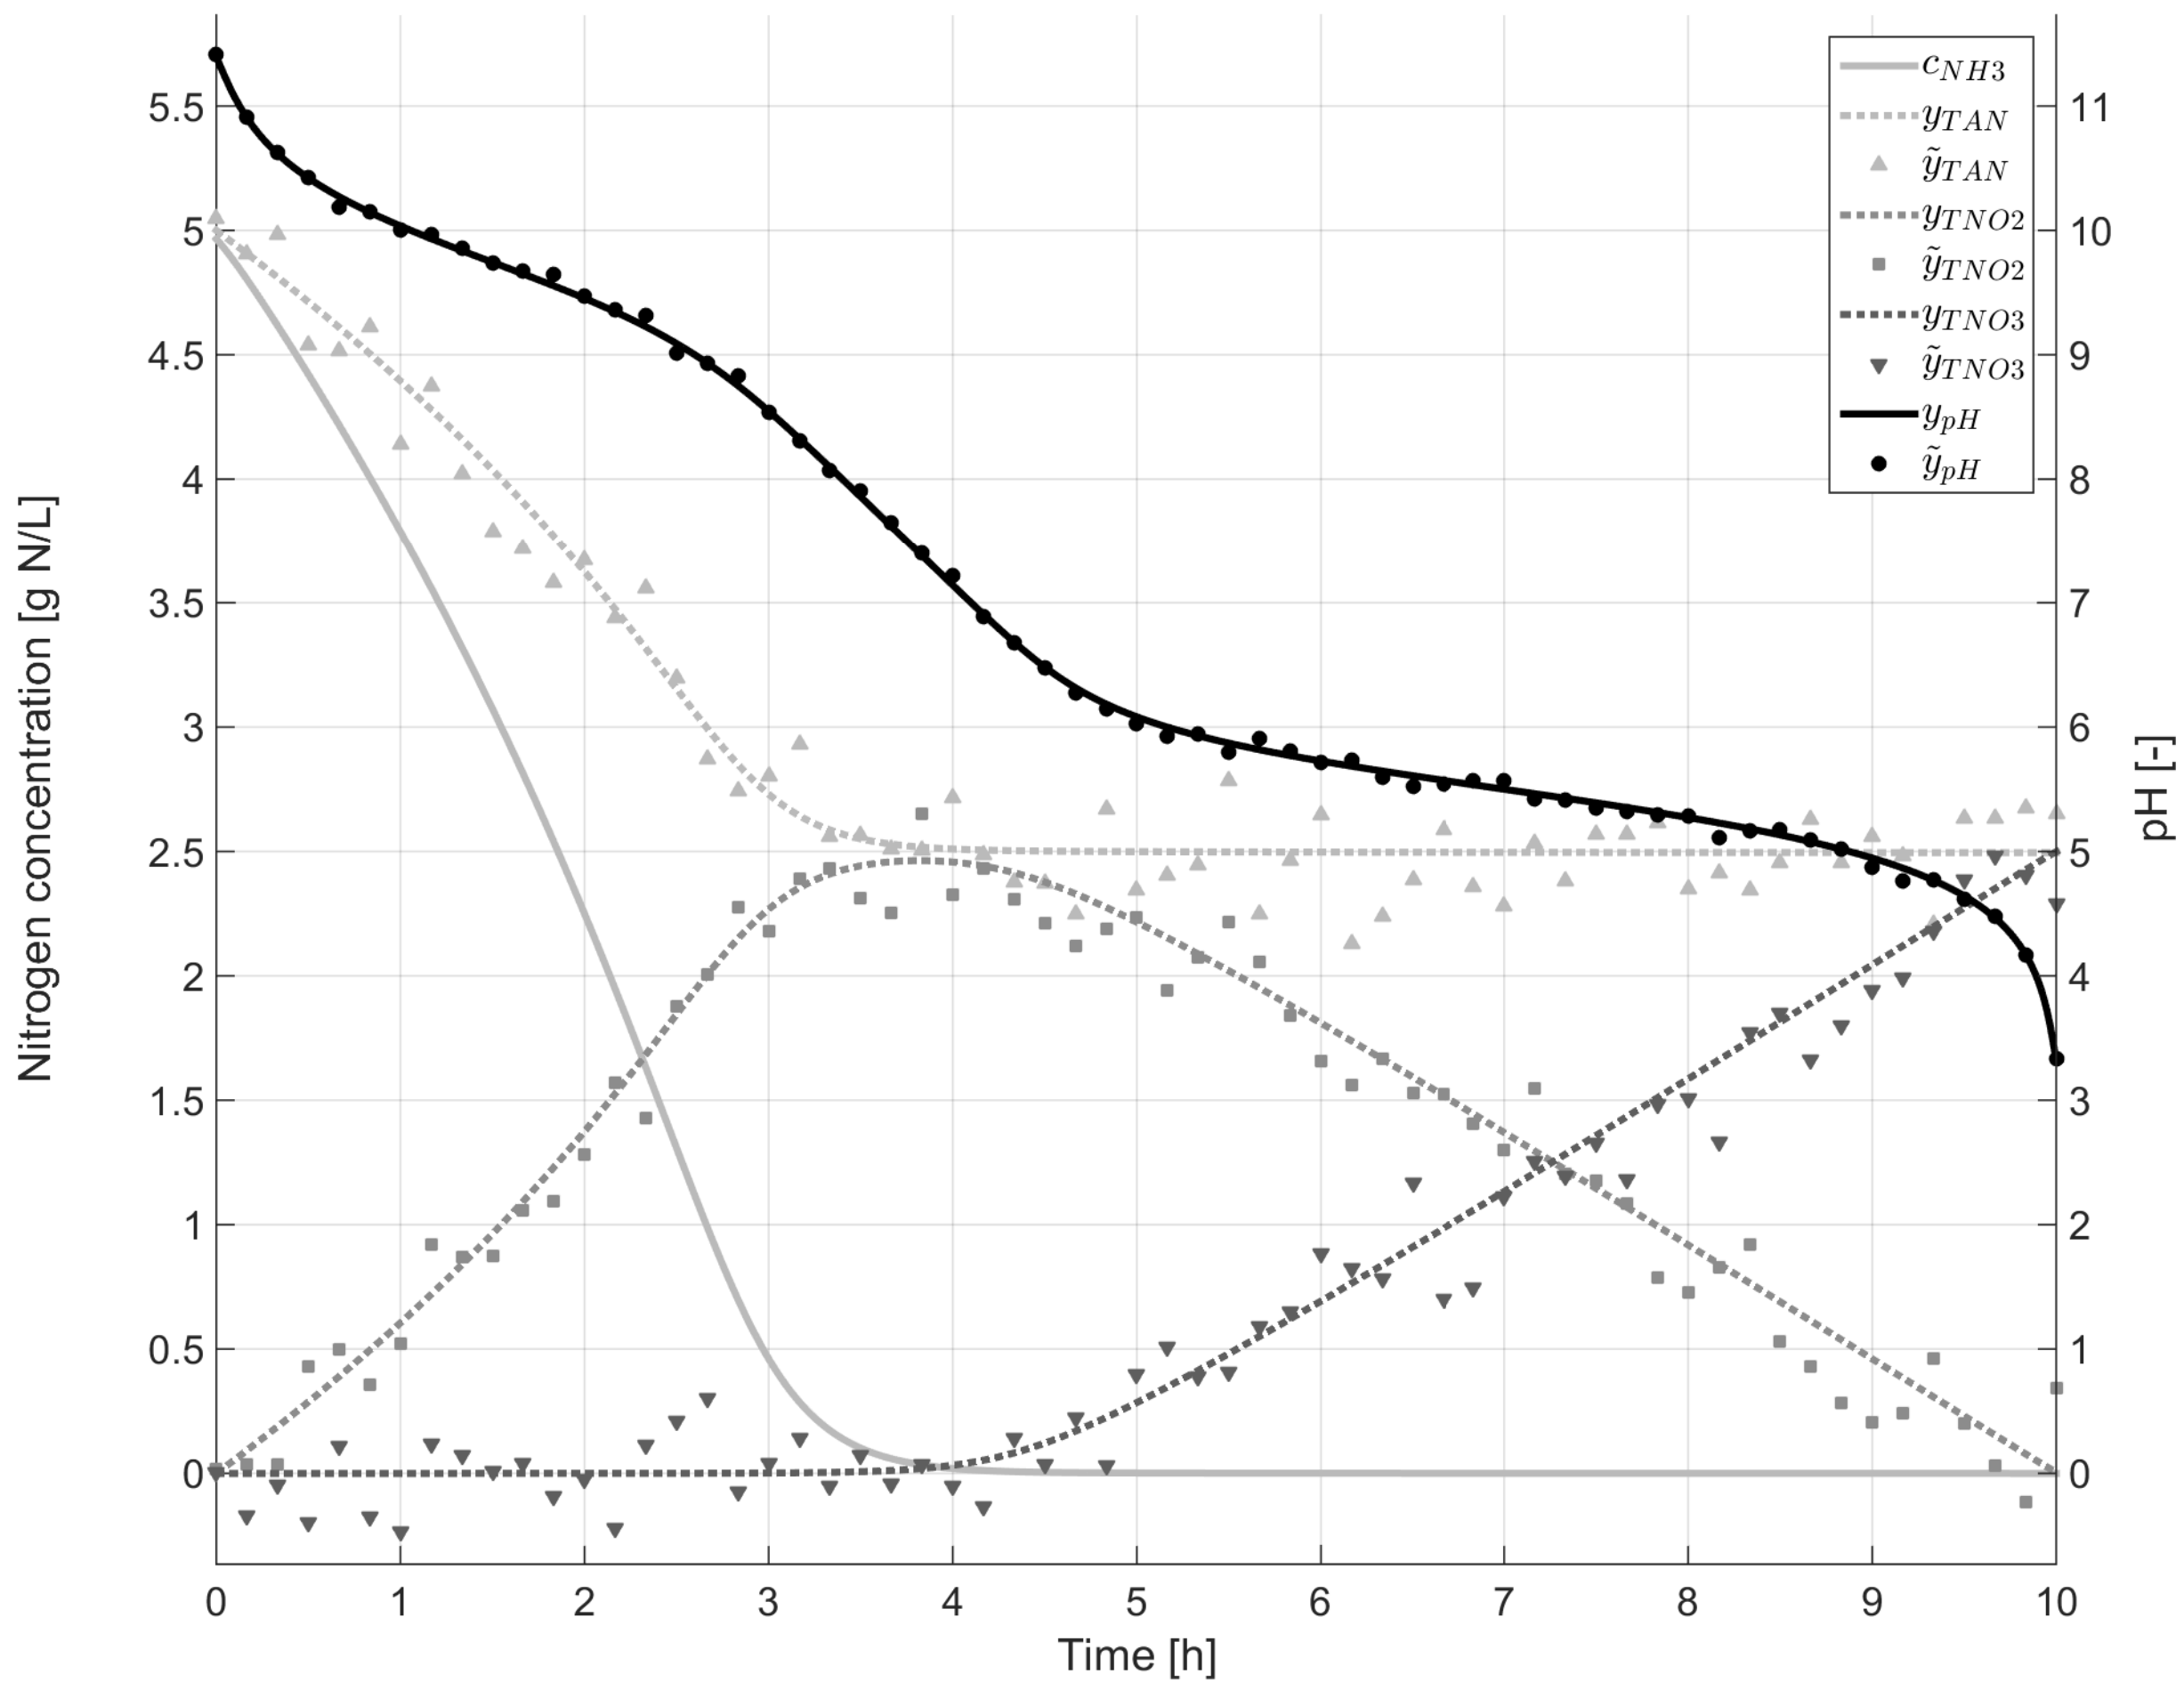

Supplement: s1 [file s1]

**Rate law 1: First-Order**  
**Rate law 2: Zero-Order**

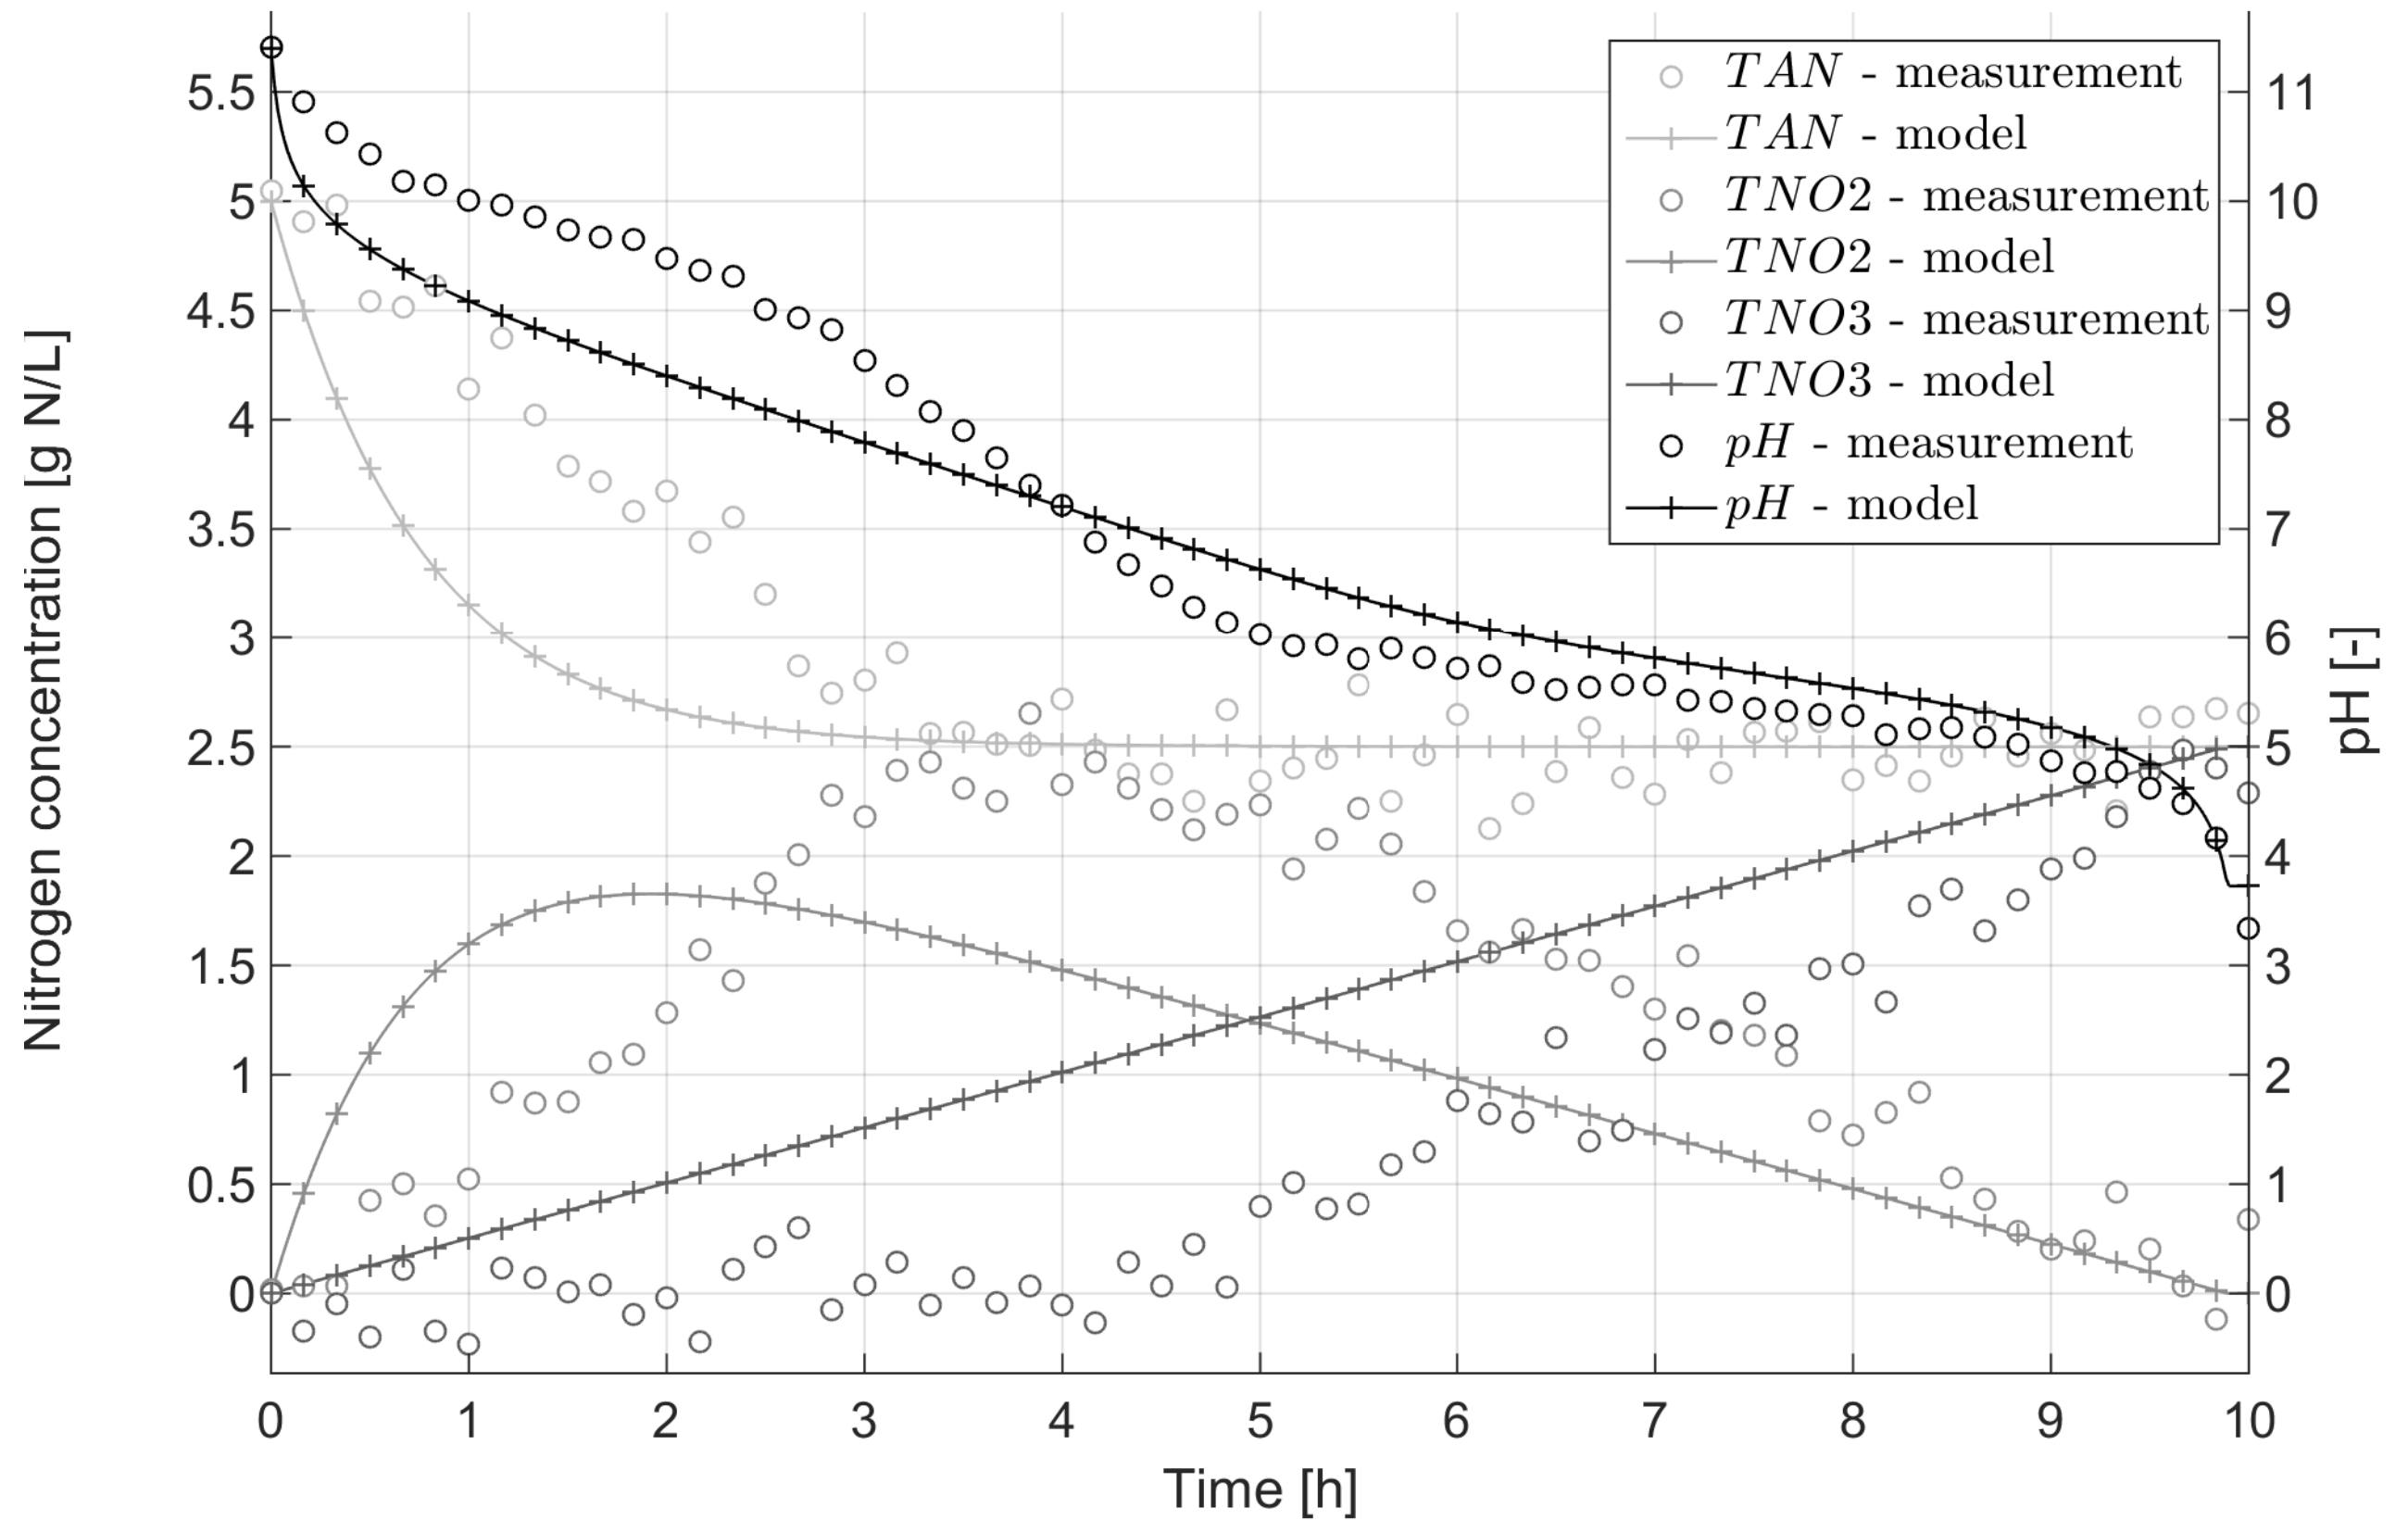

Supplement: s1 [file s1]

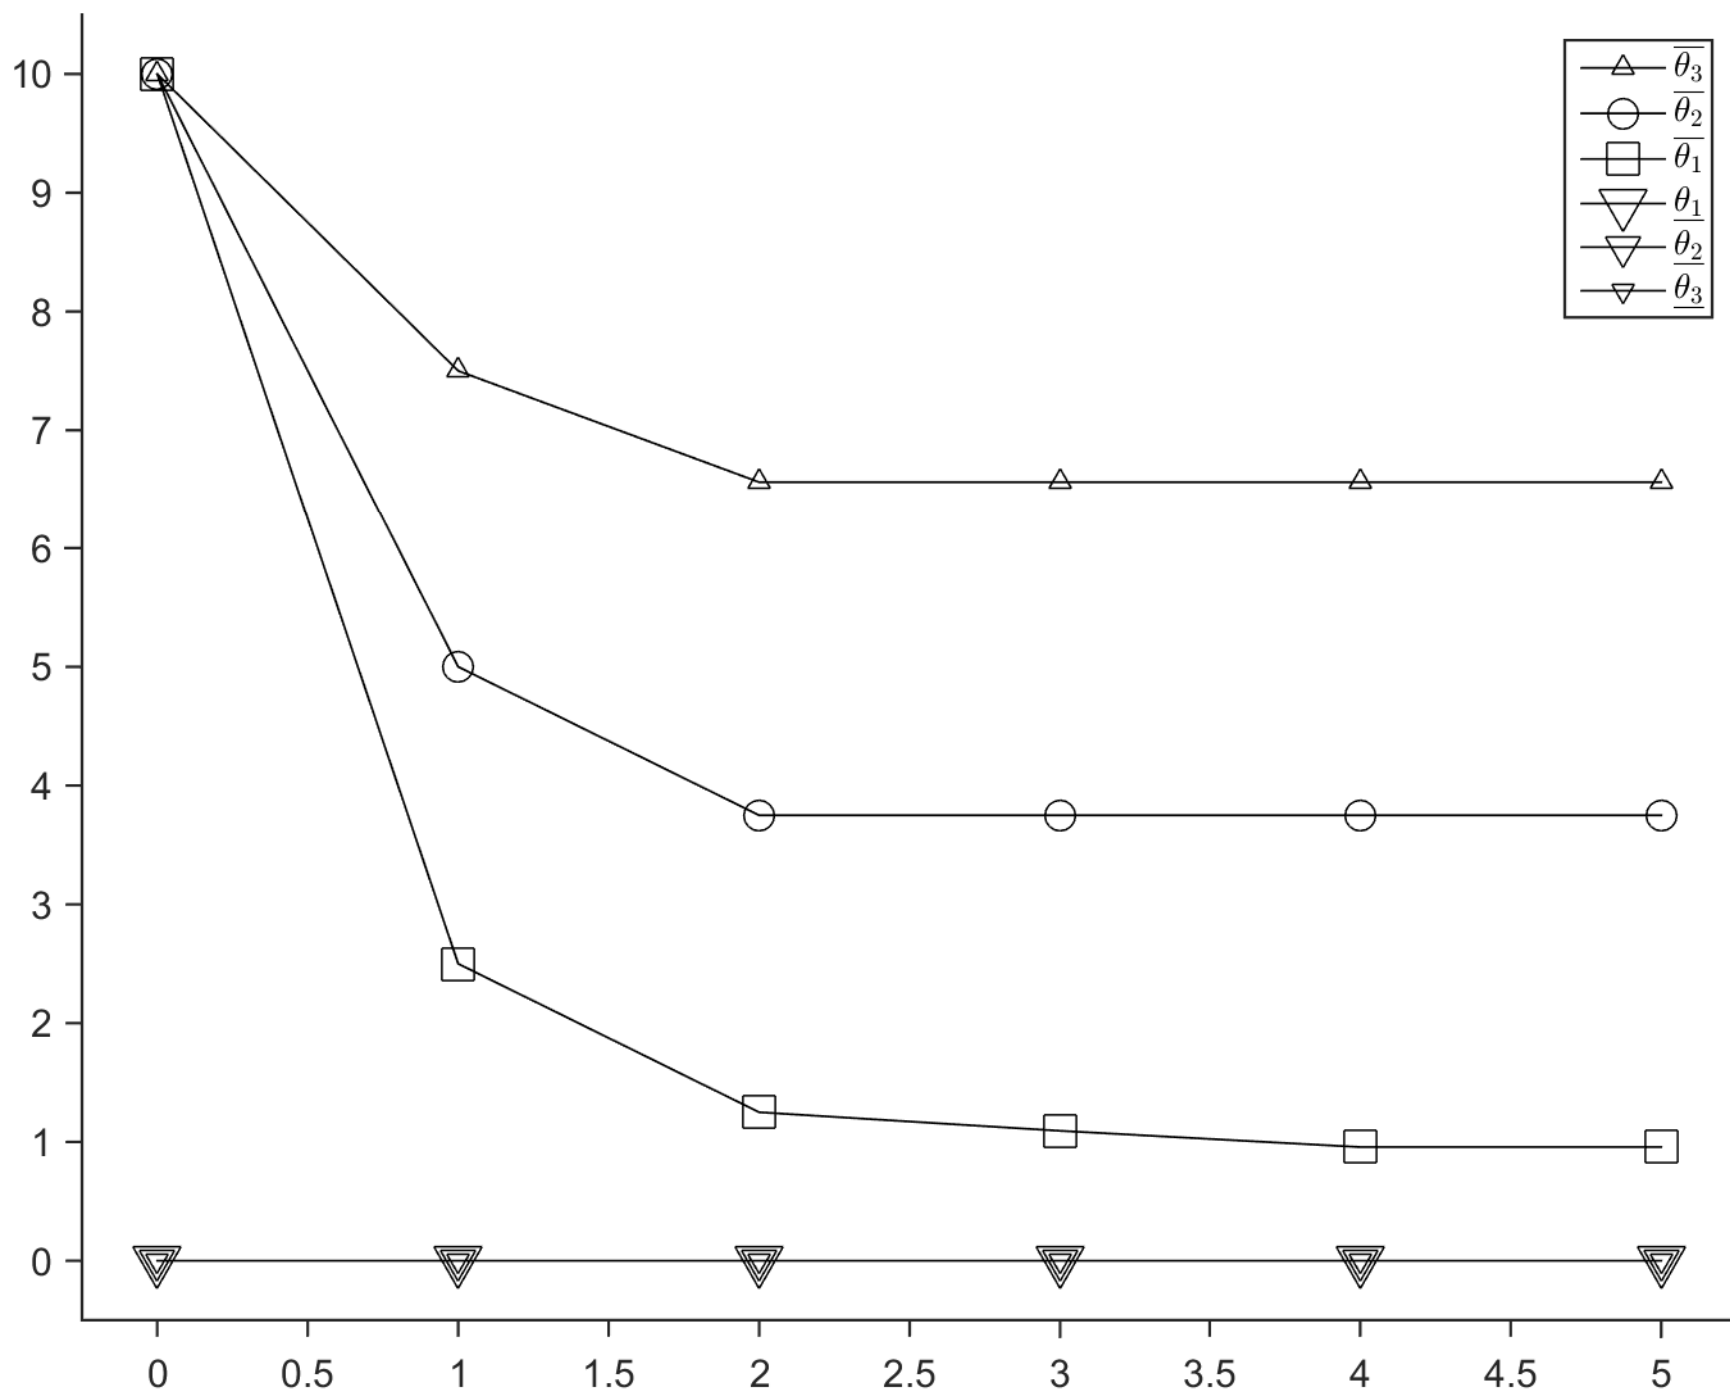

Supplement: s1 [file s1]

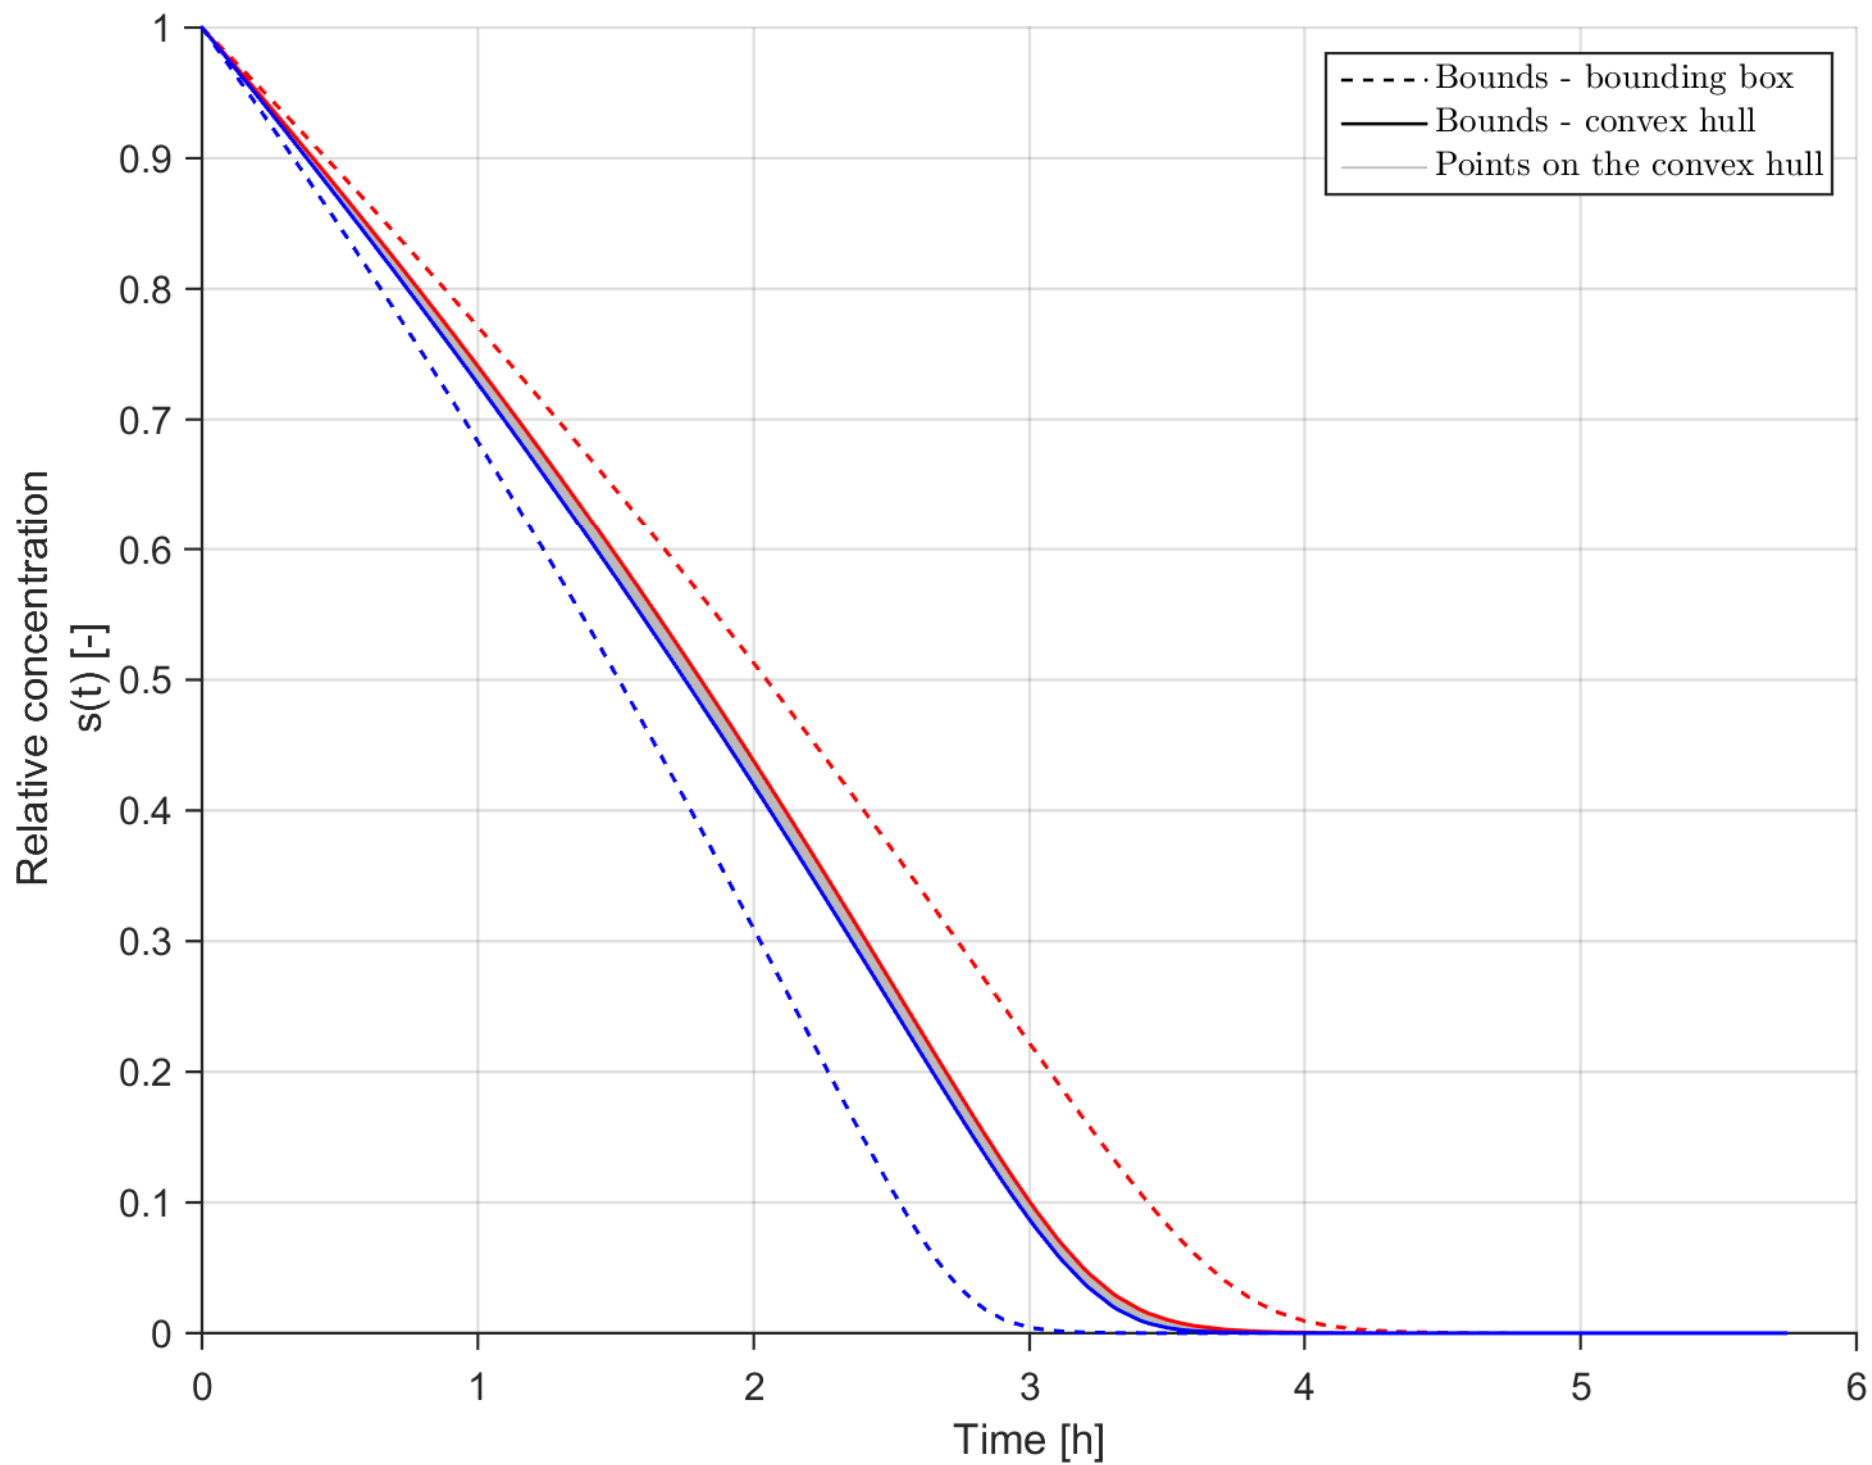

Supplement: s1 [file s1]

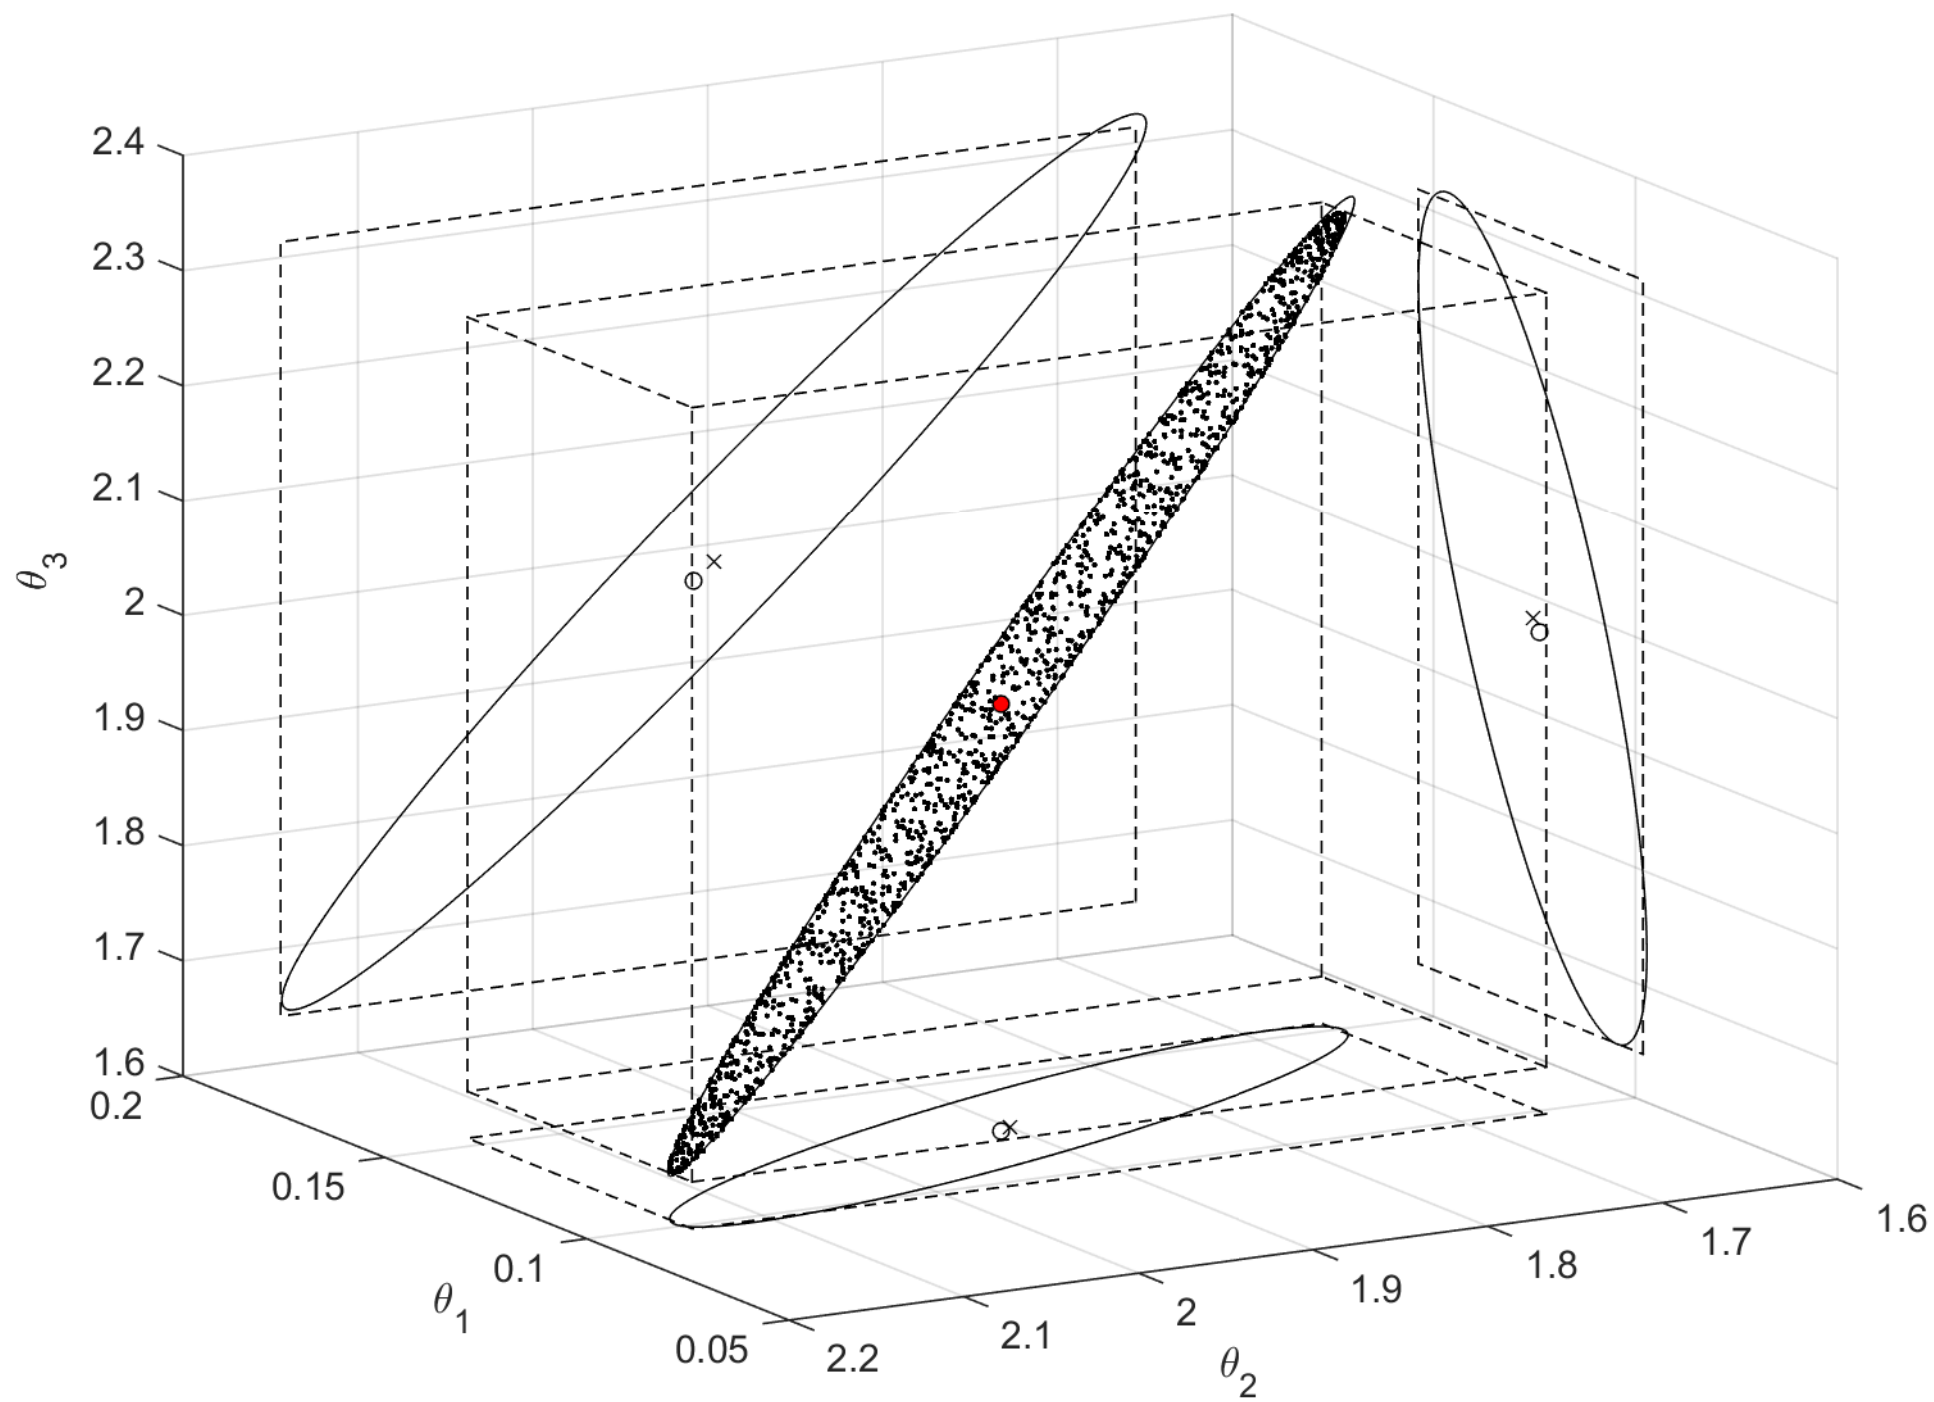

Supplement: s1 [file s1]

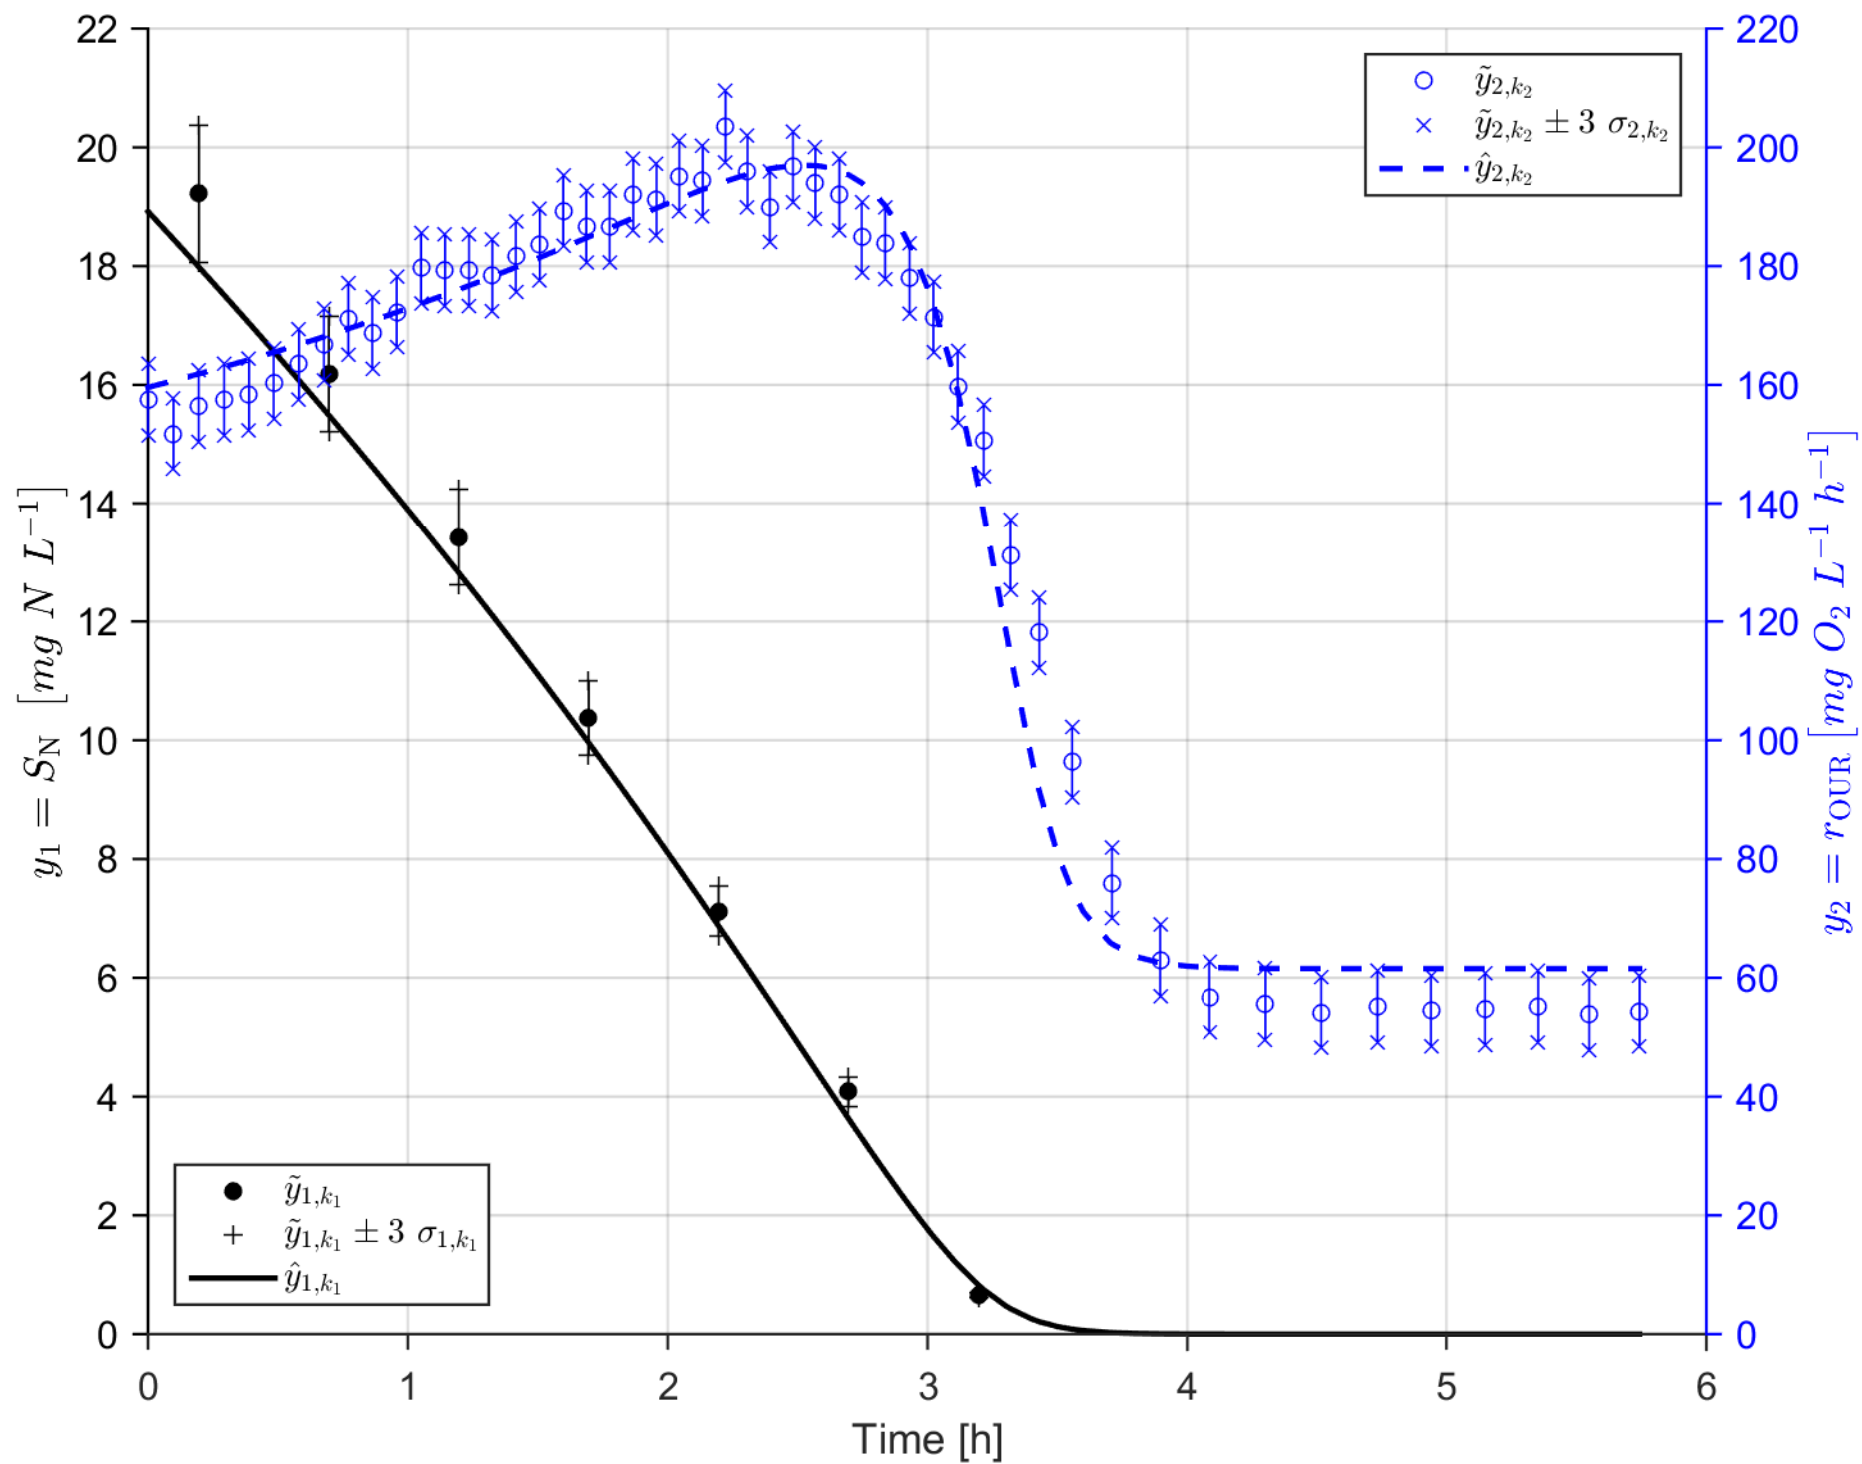

Supplement: s1 [file s1]

Rate law 1: First-Order  
Rate law 2: Haldane

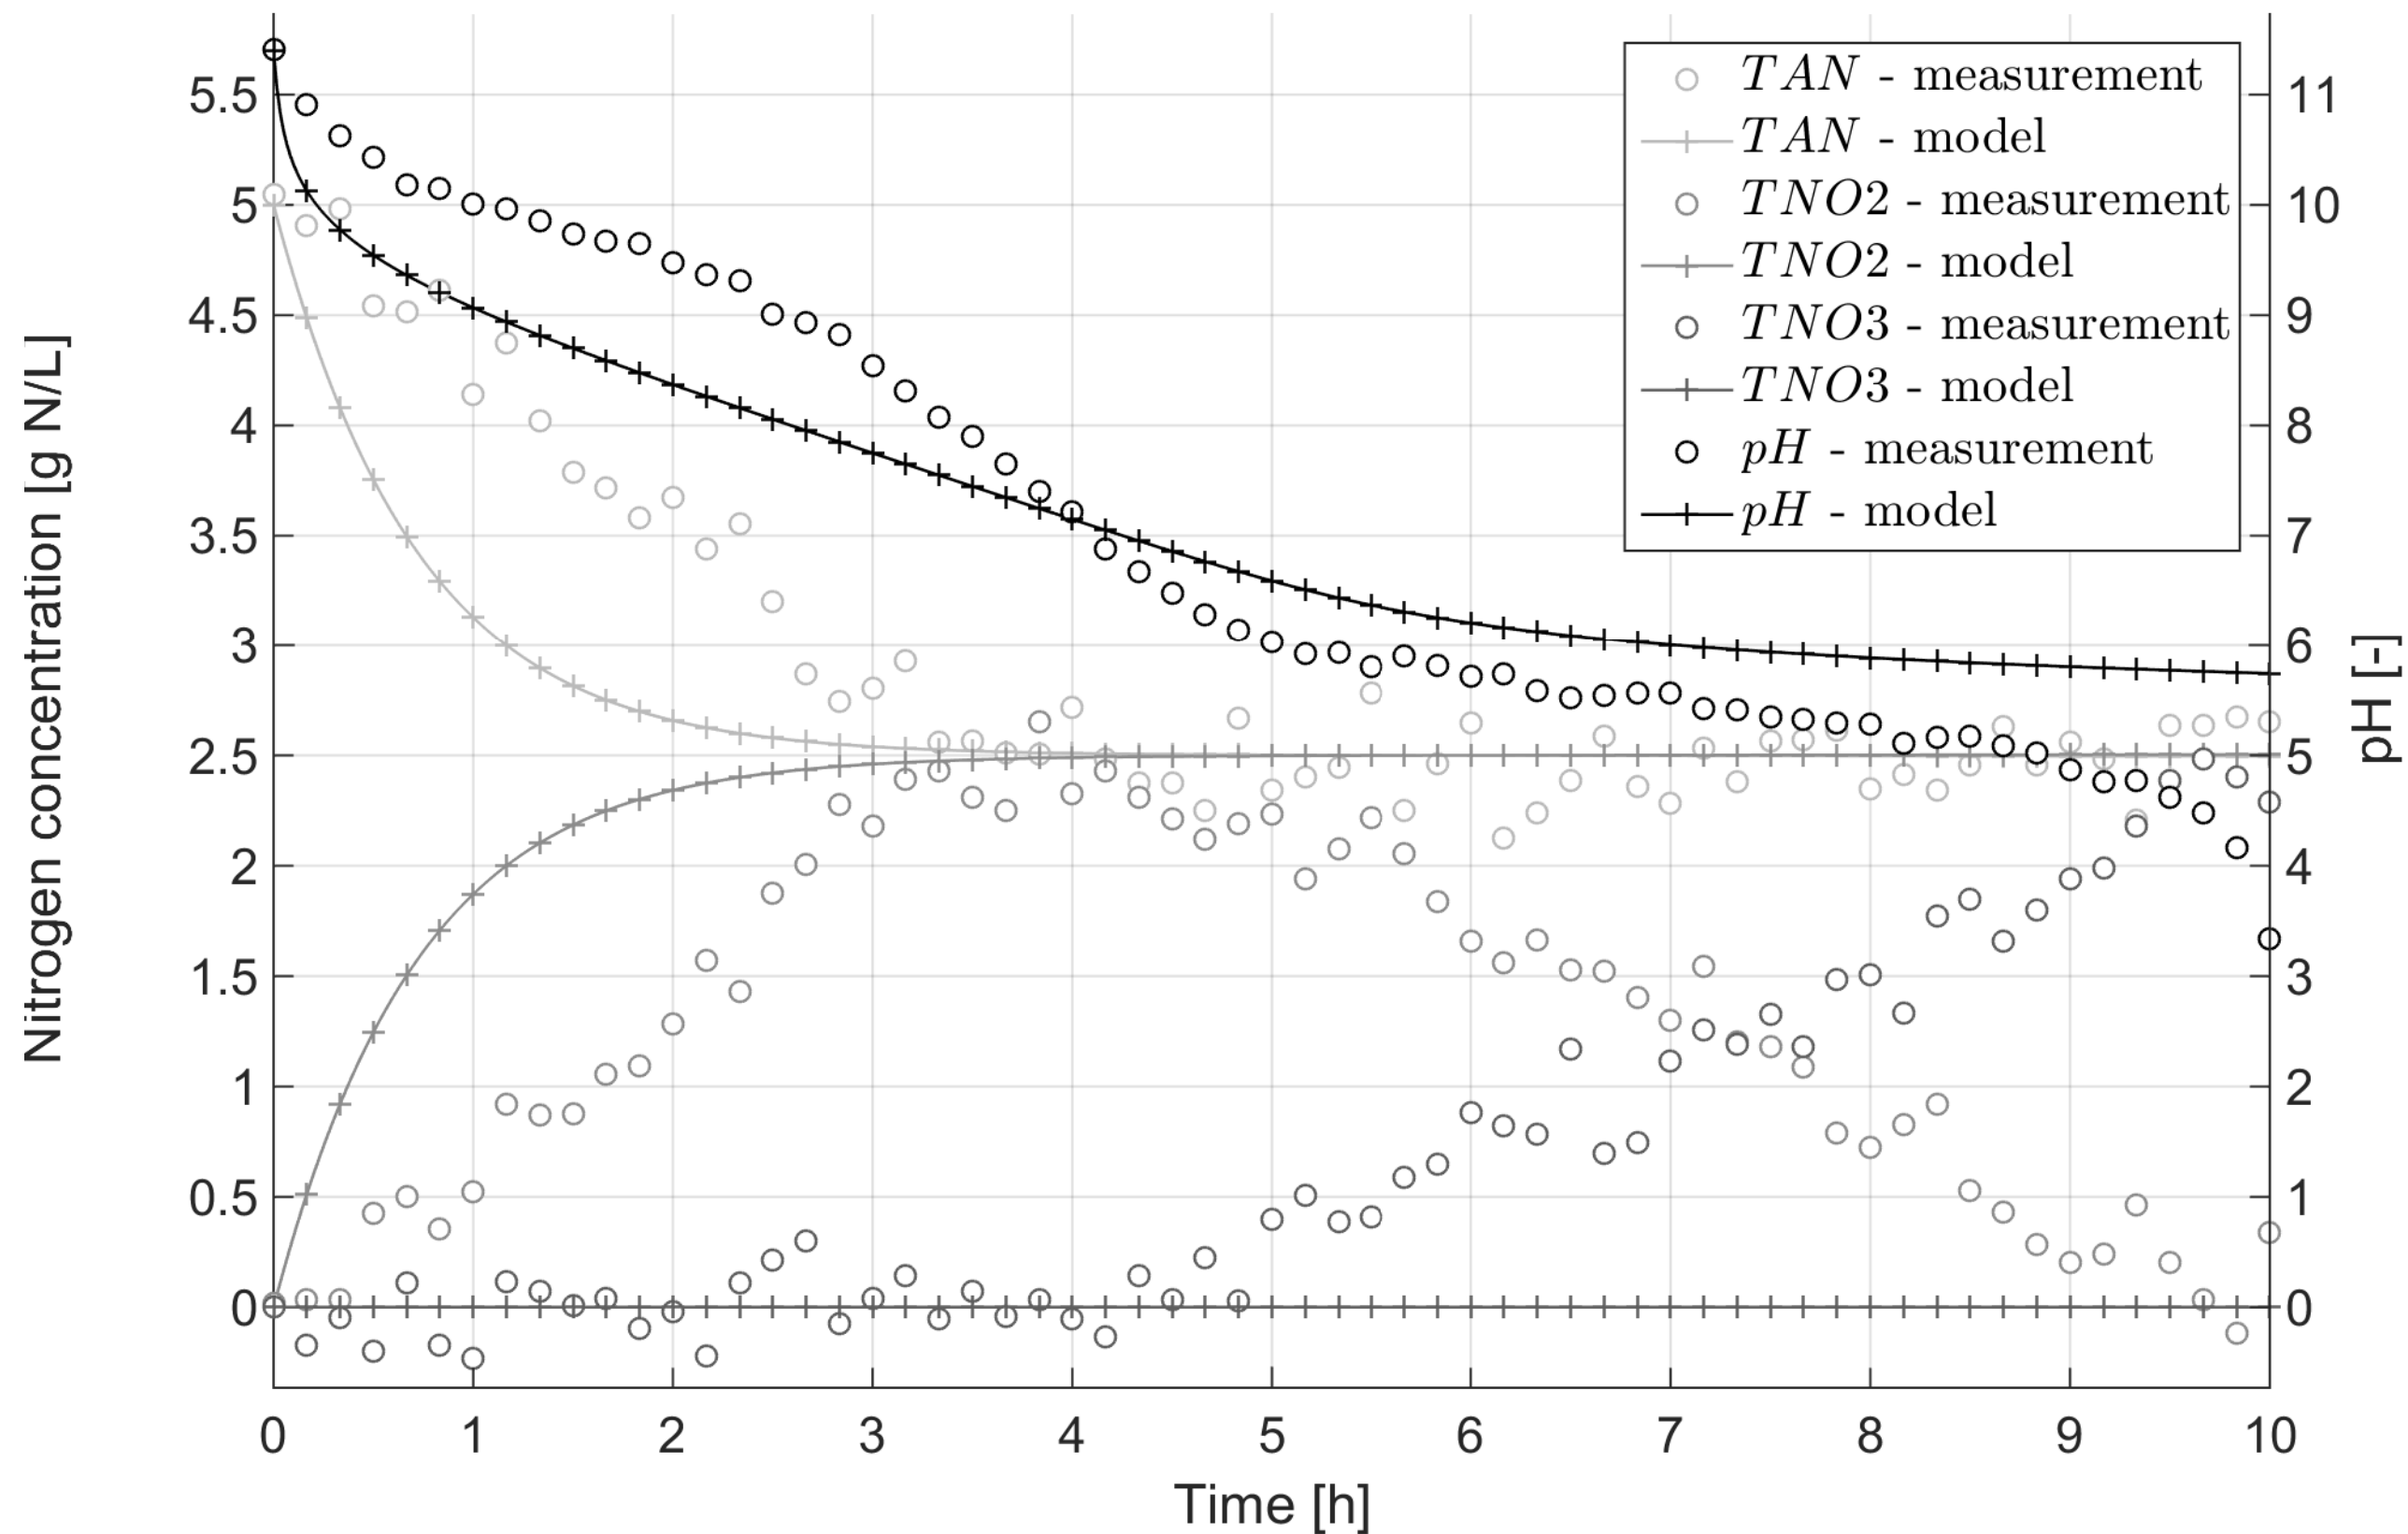

Supplement: s1 [file s1]

Rate law 1: Haldane

Rate law 2: Monod



Supplement: s1 [file s1]

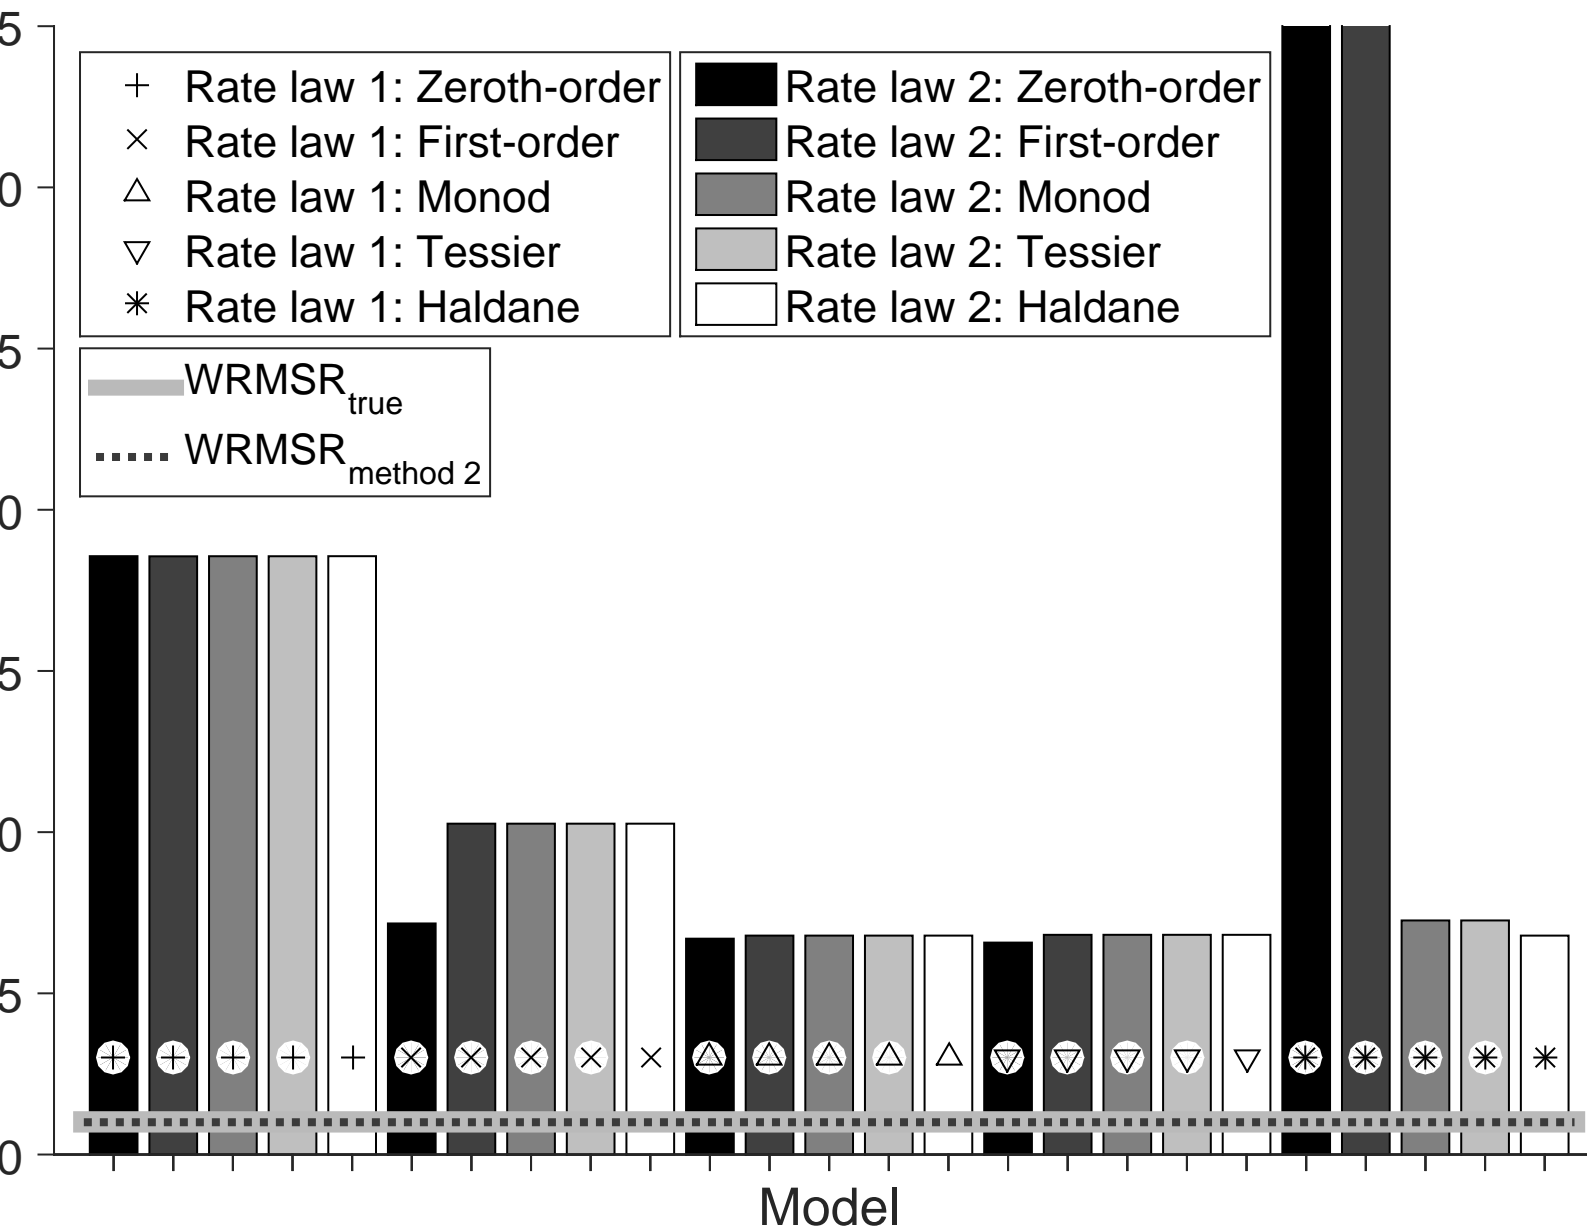

Supplement: s1 [file s1]

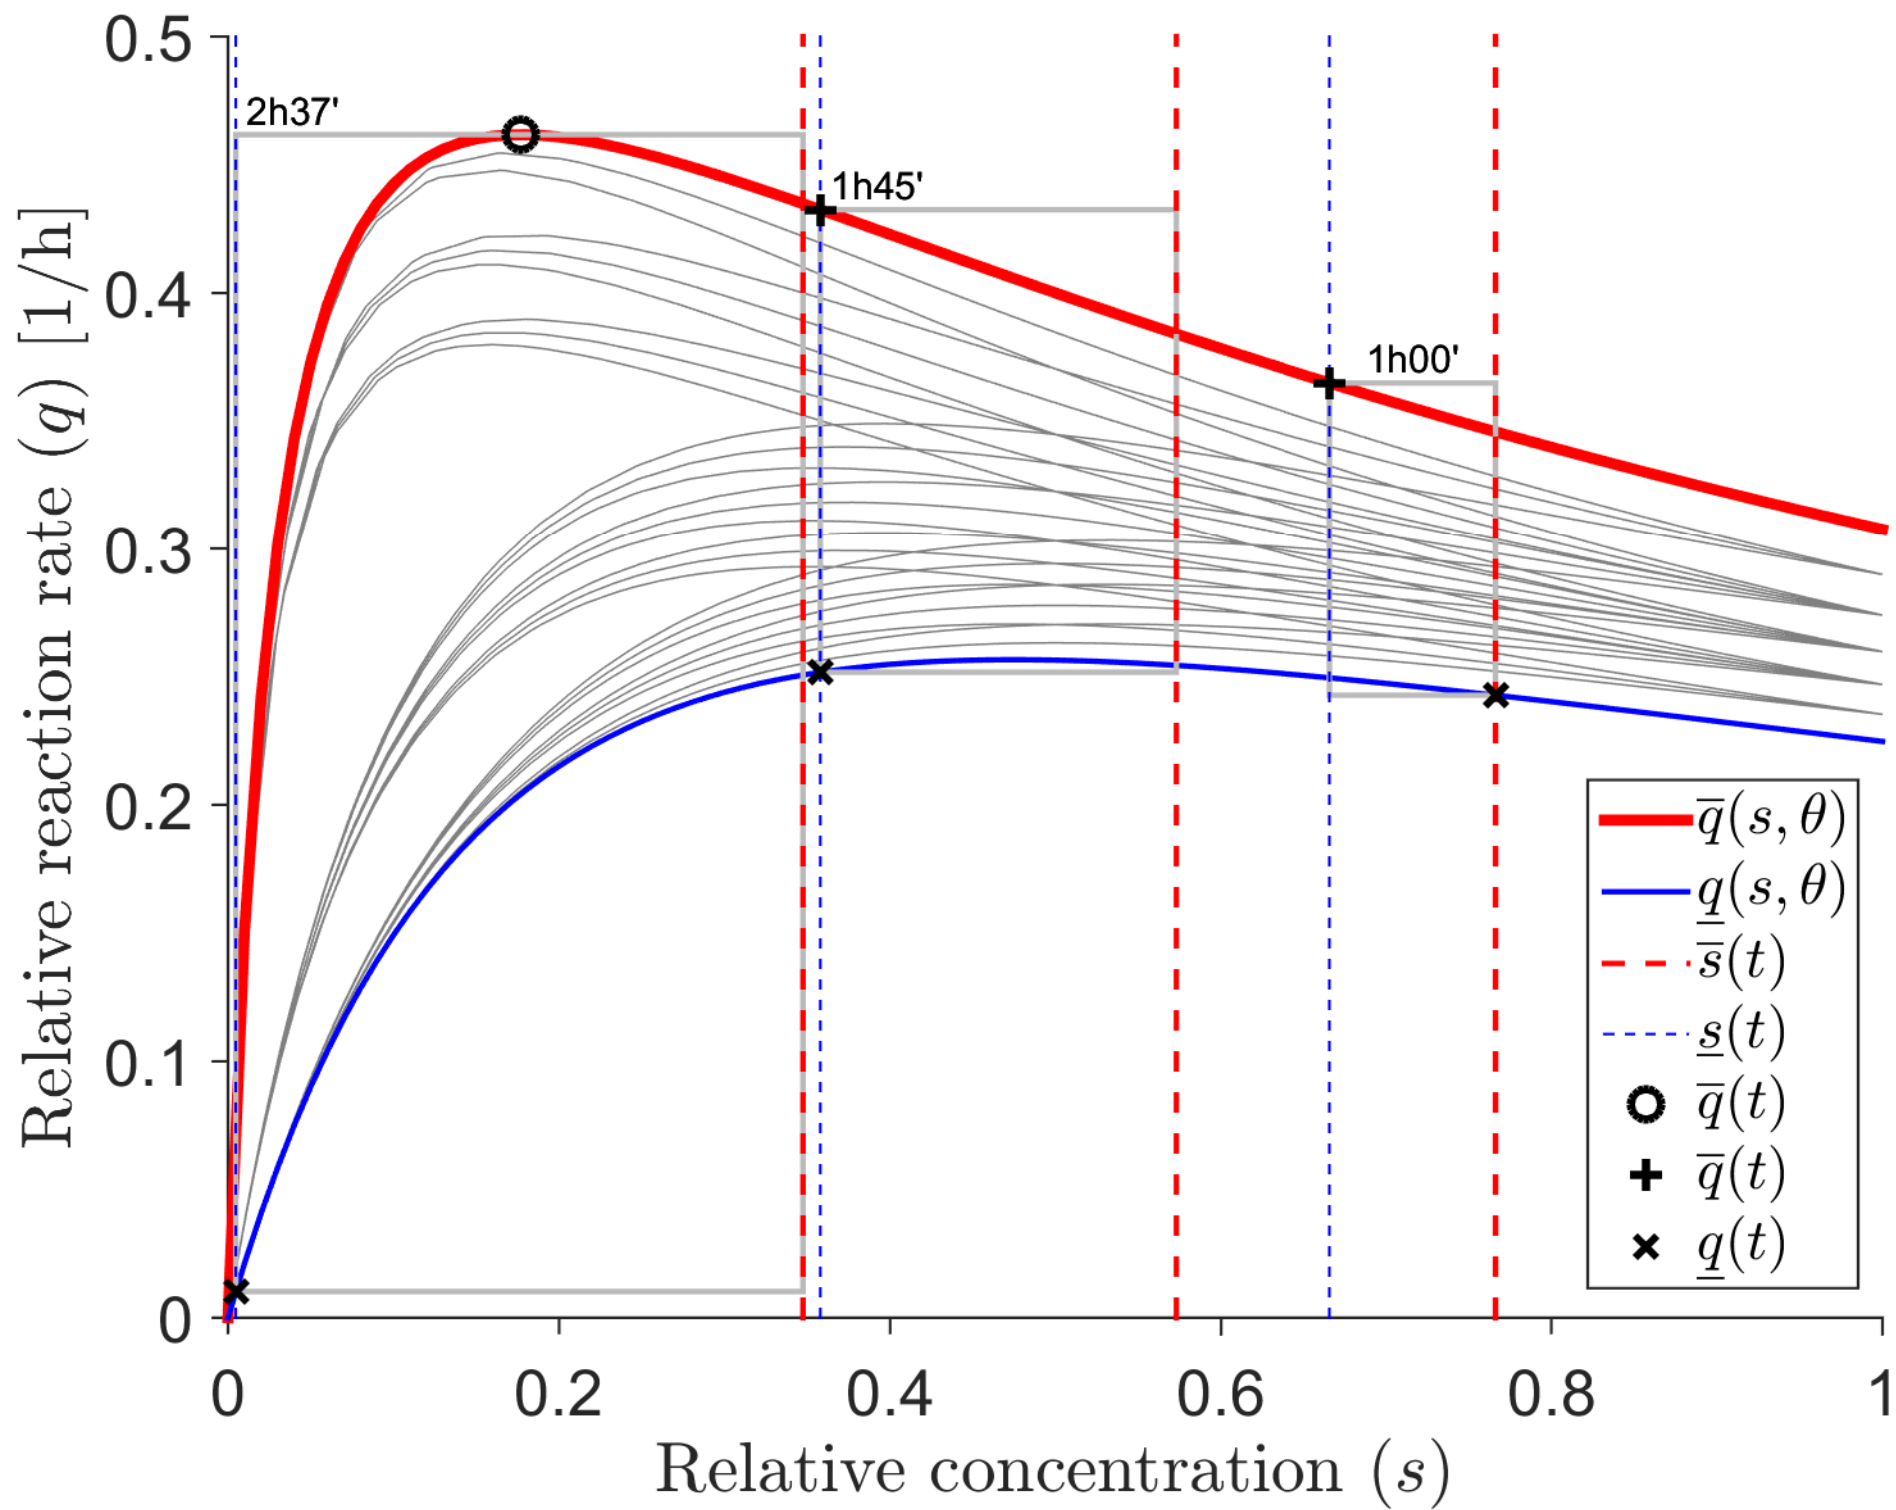

Supplement: s1 [file s1]

Rate law 1: Tessier  
Rate law 2: Zero-Order

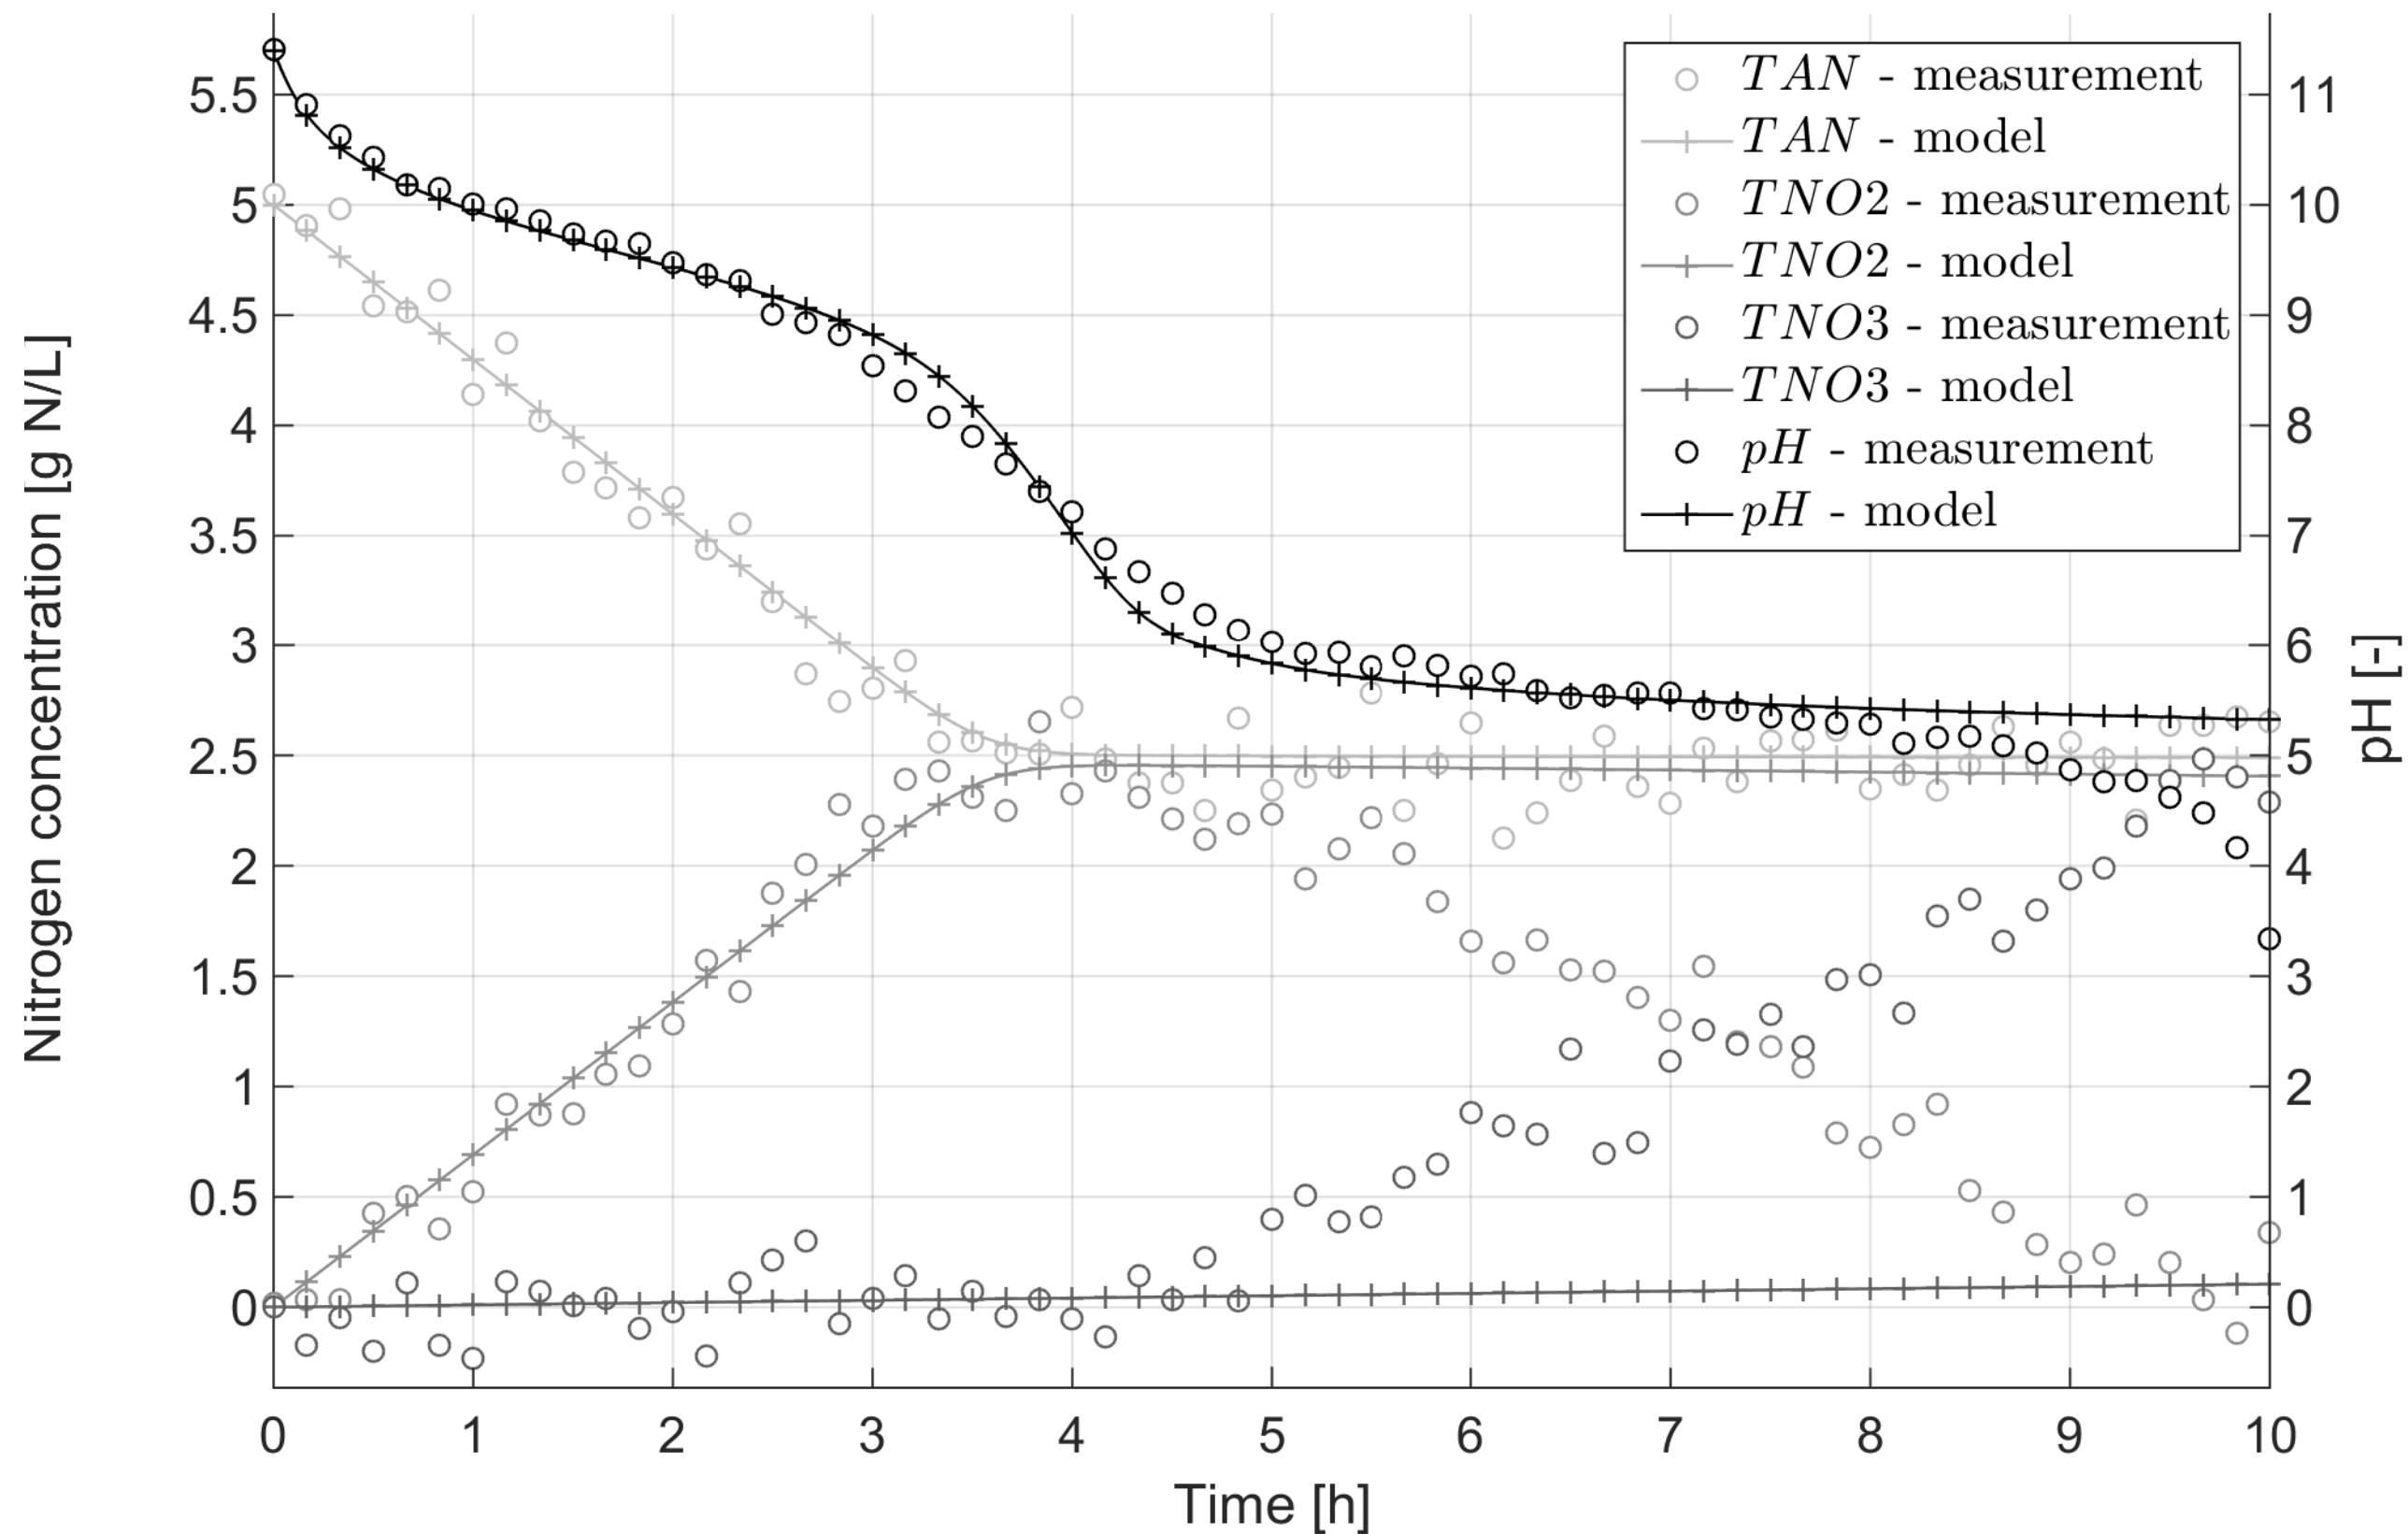

Supplement: s1 [file s1]

**Rate law 1: First-Order**  
**Rate law 2: First-Order**

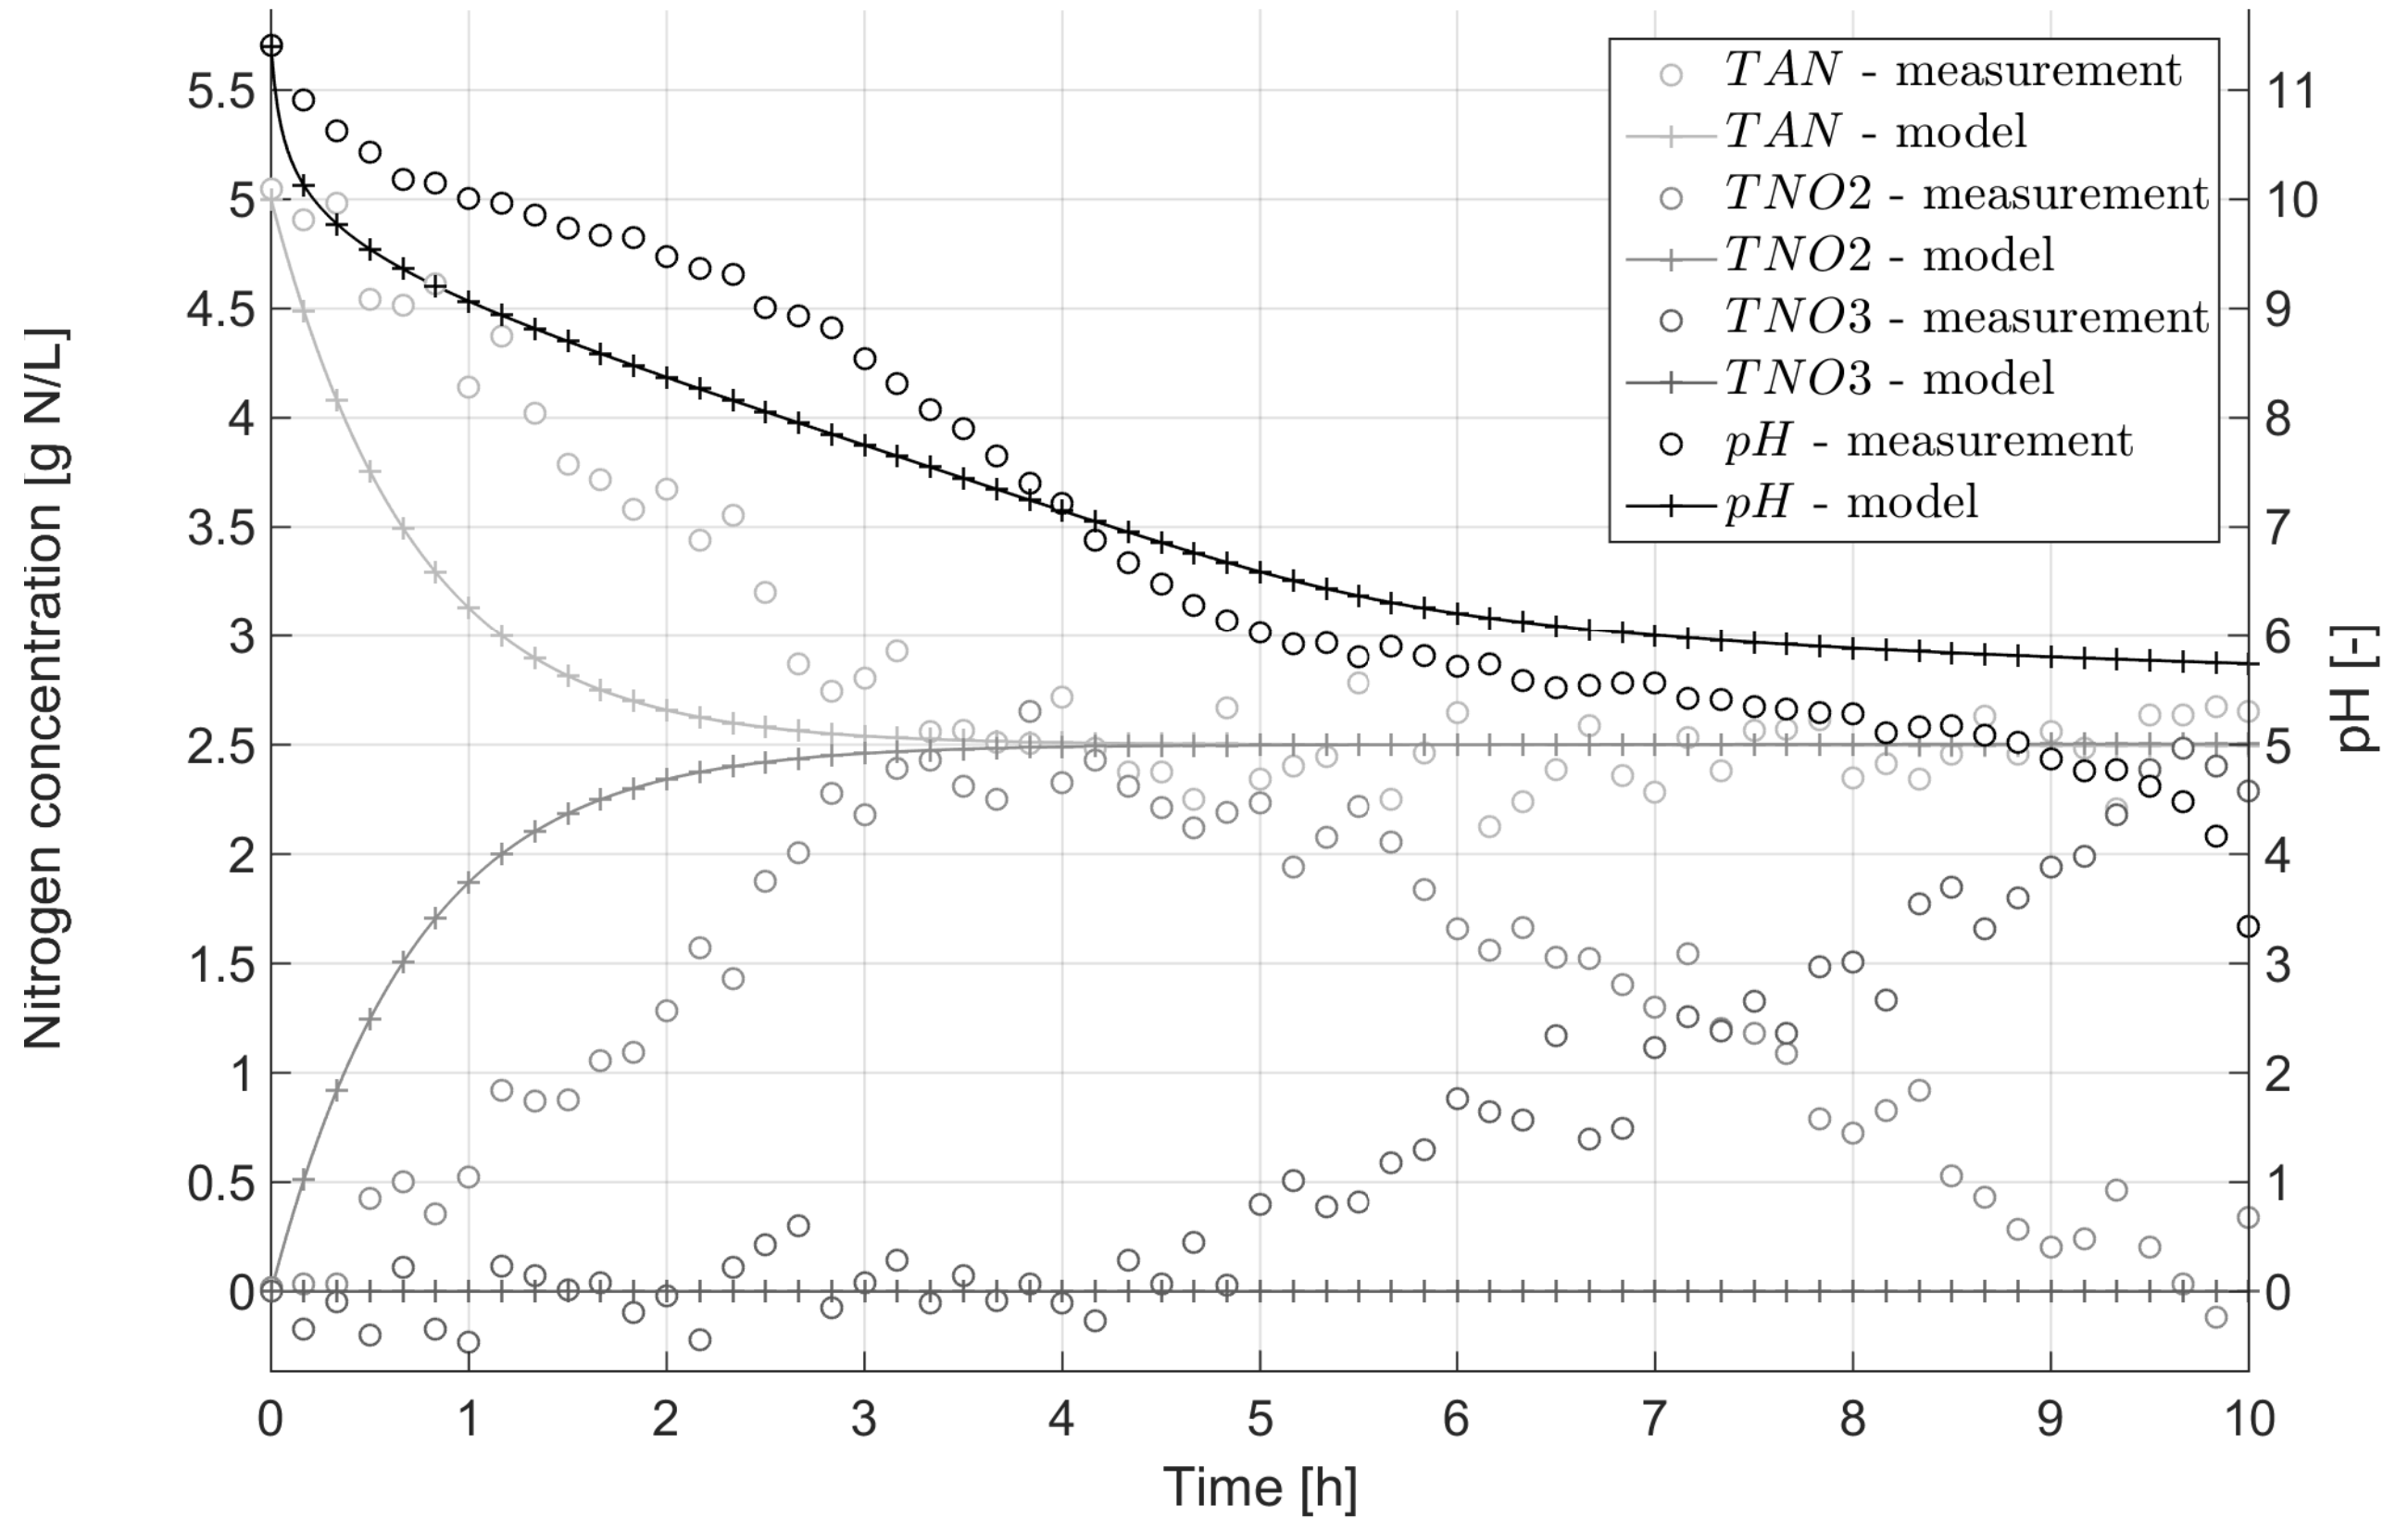

Supplement: s1 [file s1]

**Rate law 1: First-Order**  
**Rate law 2: Tessier**



Supplement: s1 [file s1]

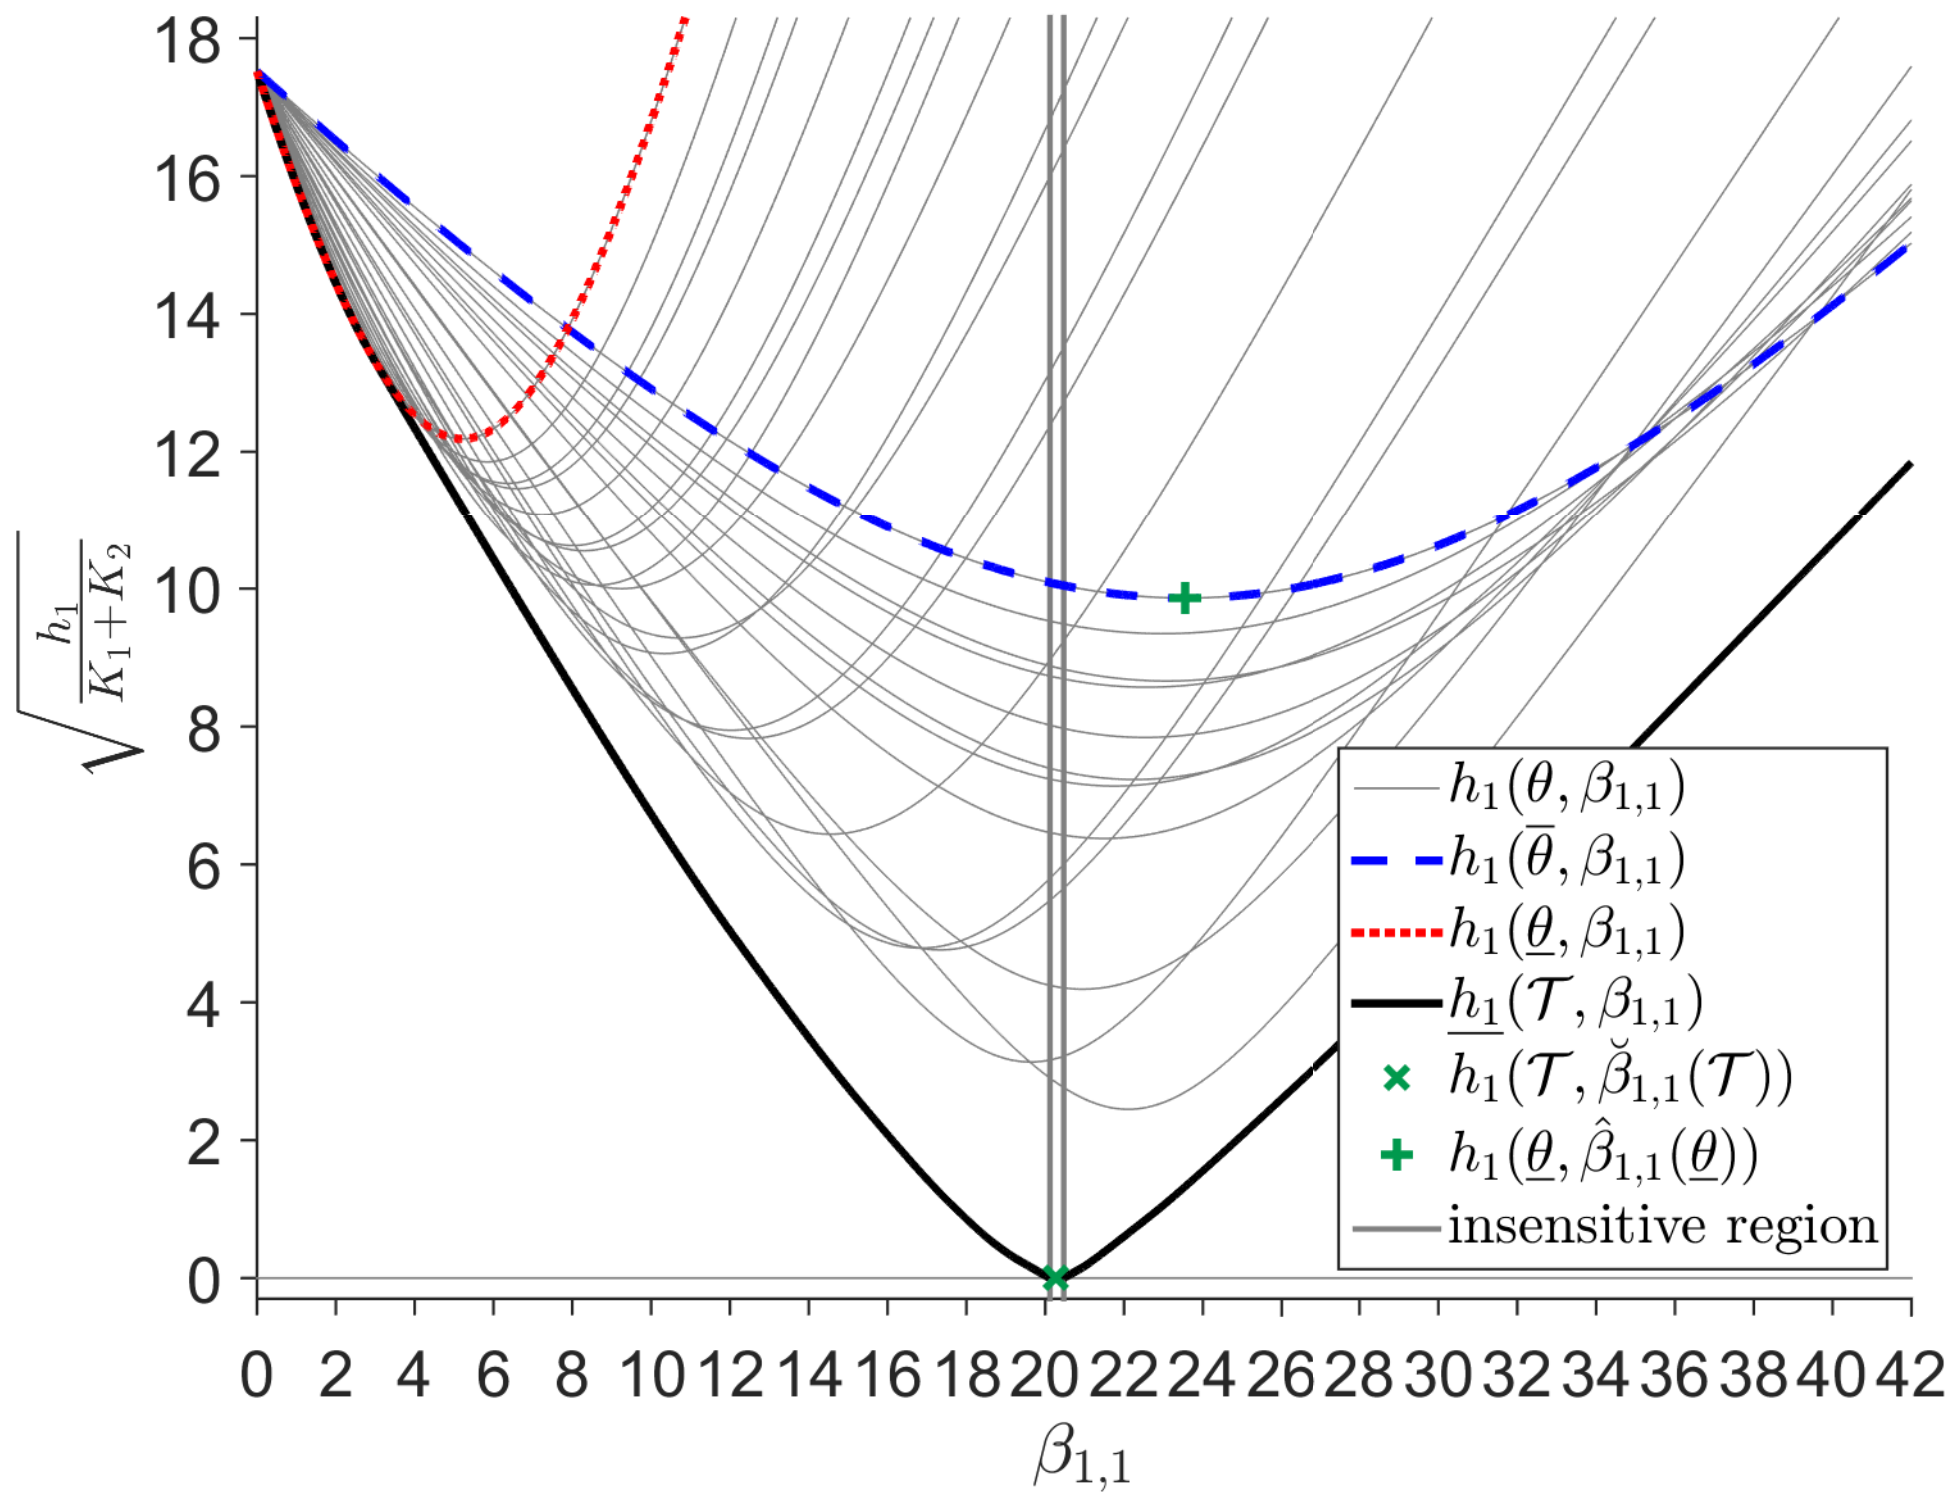

Supplement: s1 [file s1]

Rate law 1: Monod

Rate law 2: Monod



Supplement: s1 [file s1]

**Rate law 1: Zero-Order**  
**Rate law 2: First-Order**

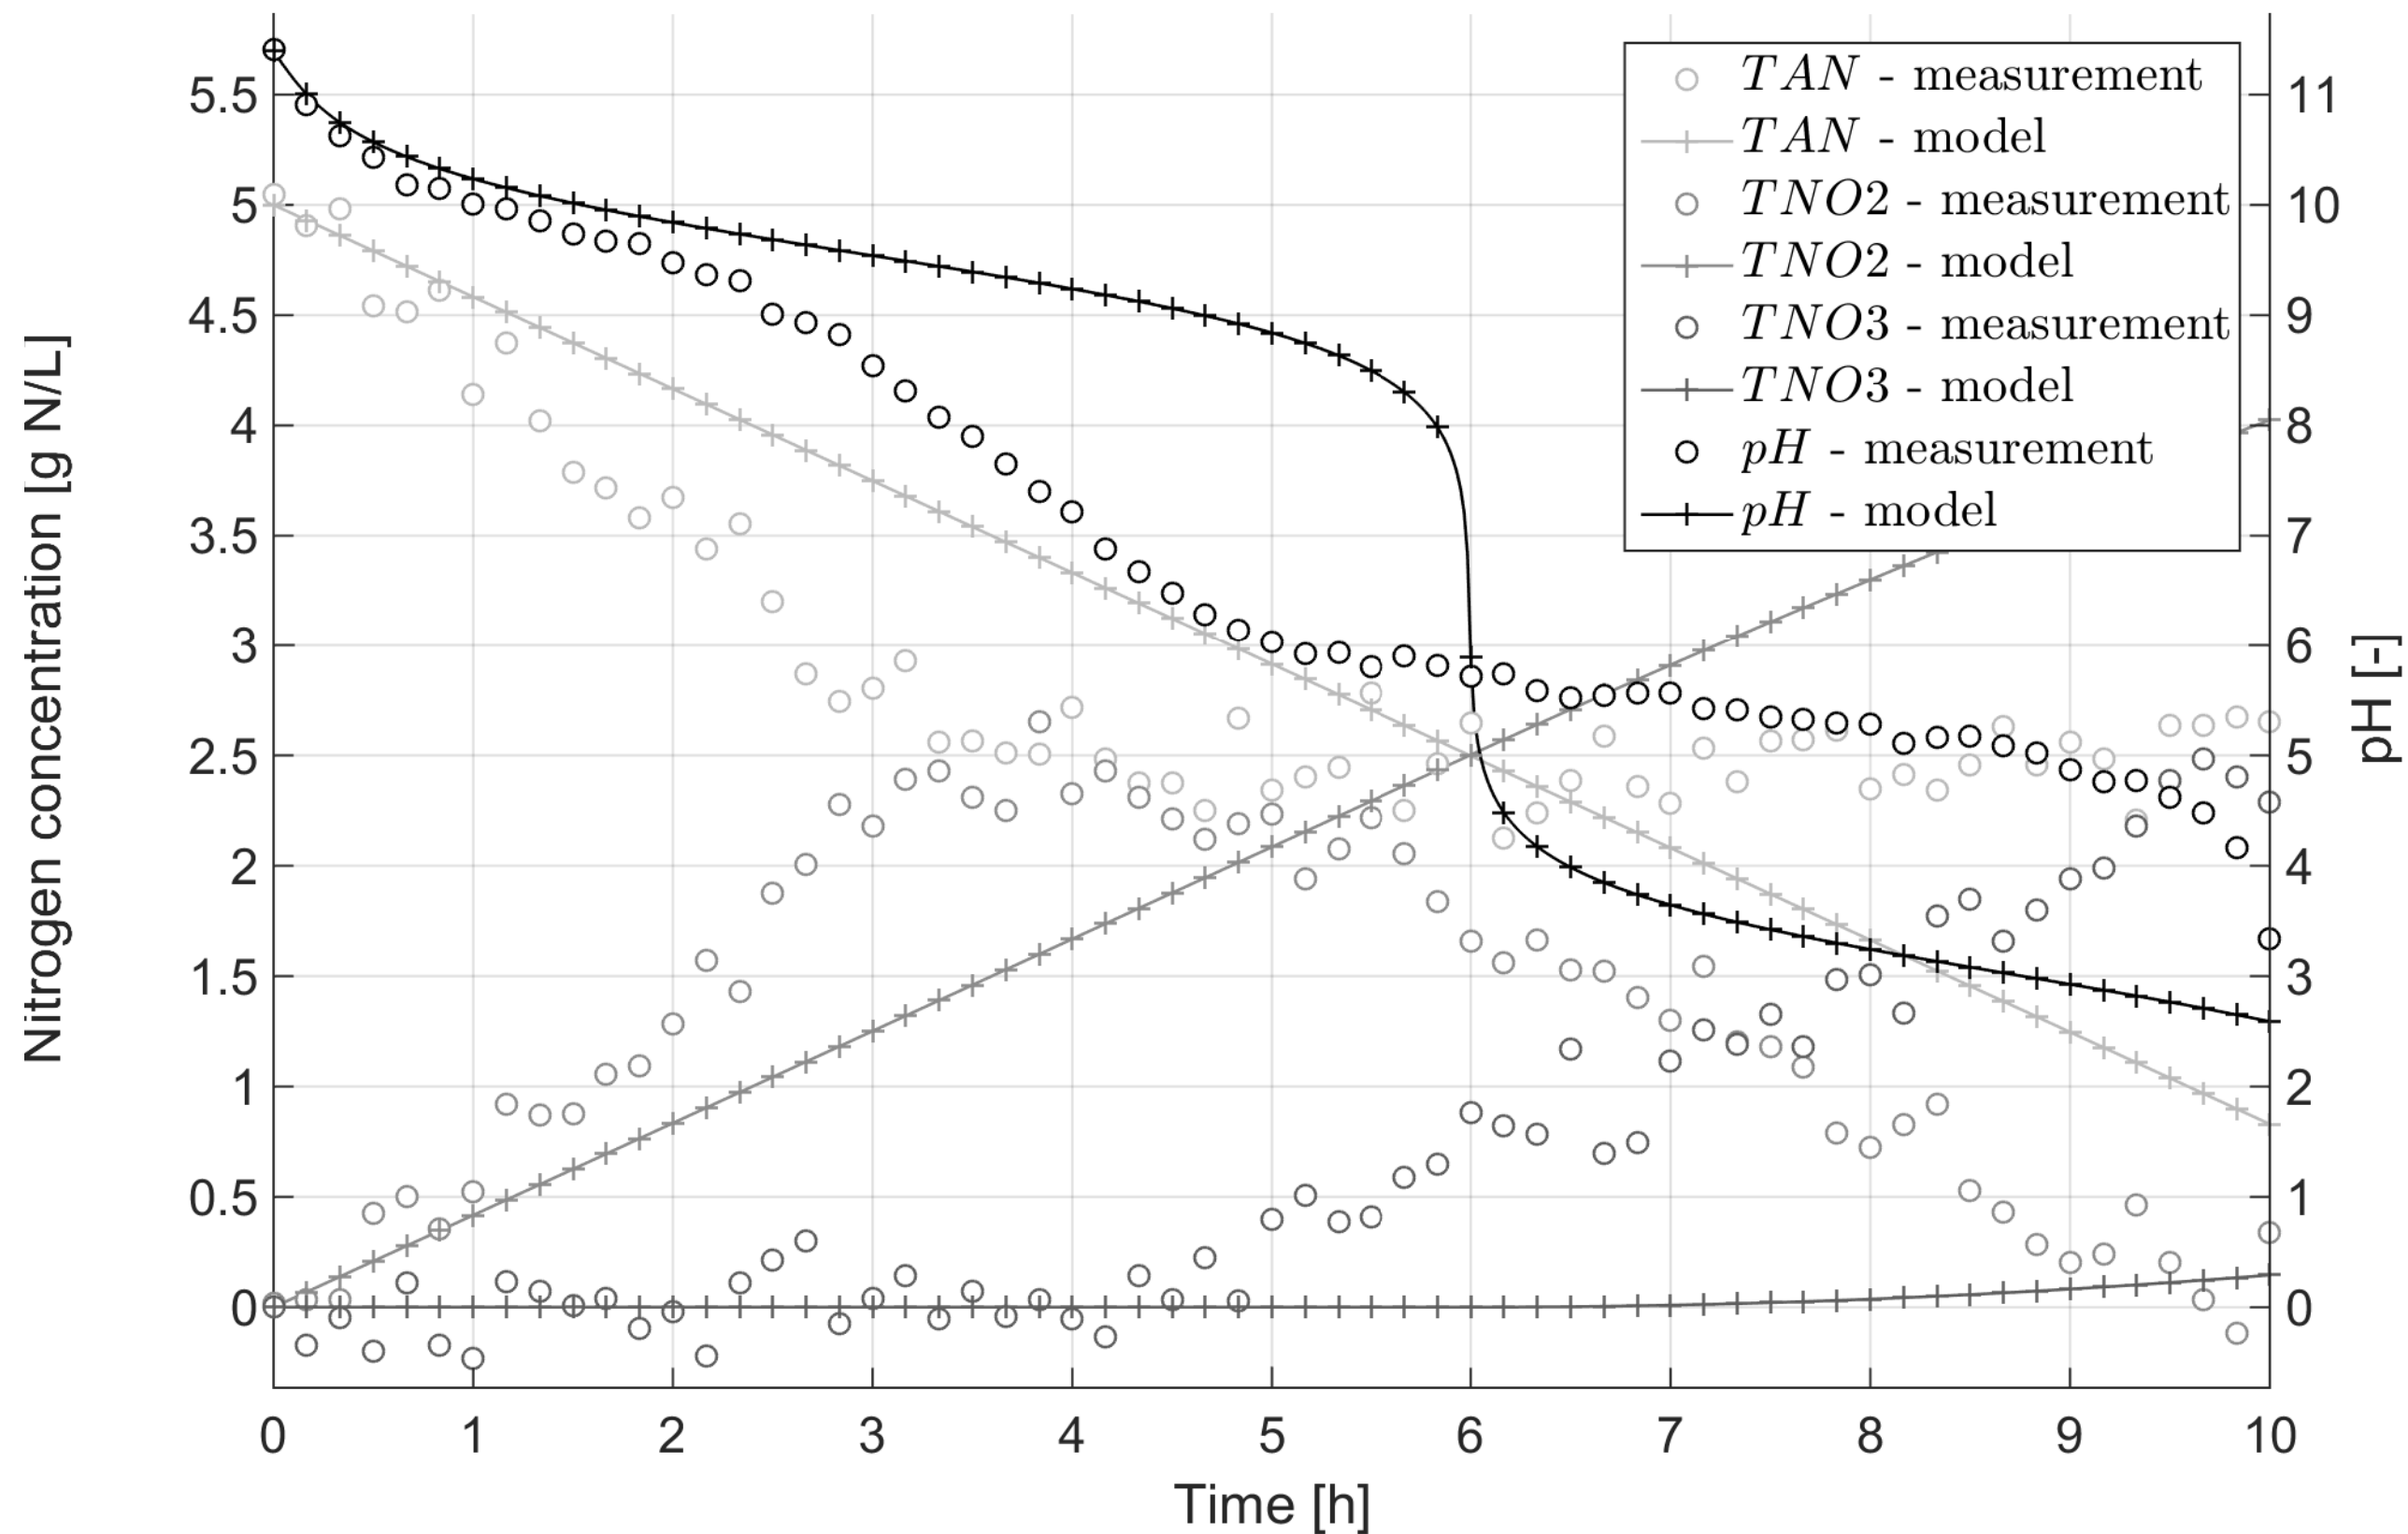

Supplement: s1 [file s1]

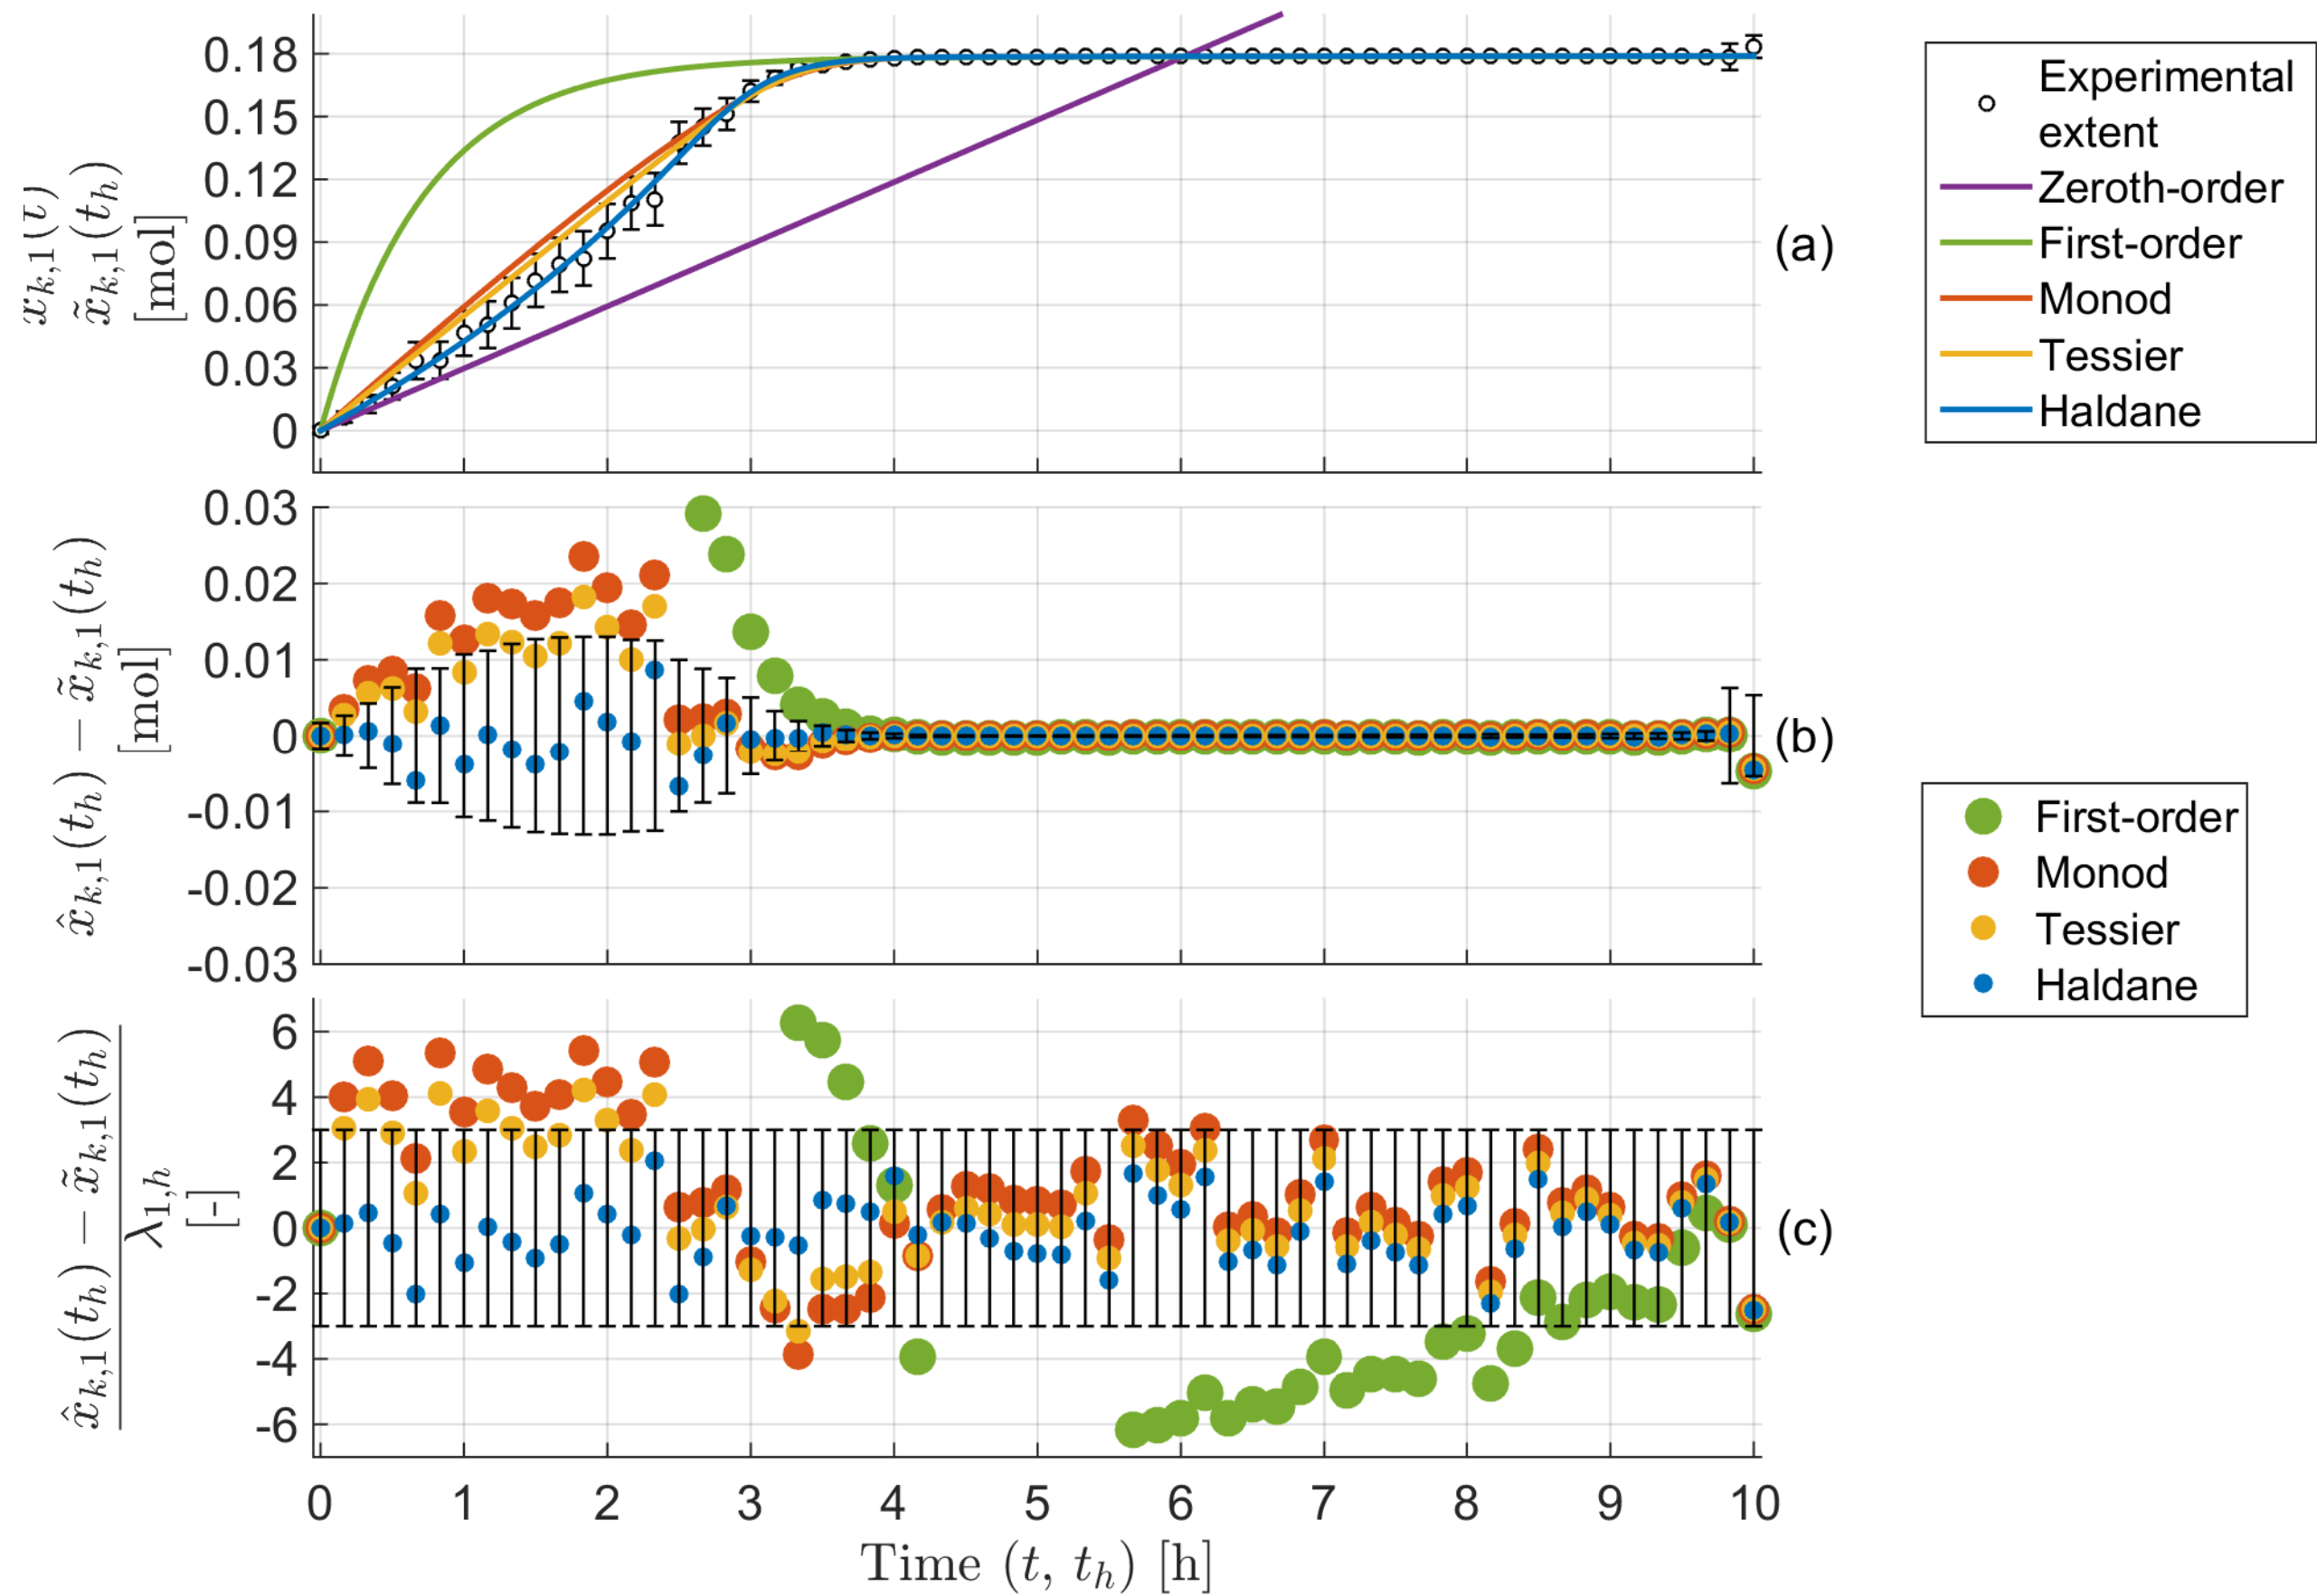

Supplement: s1 [file s1]

Rate law 1: Haldane

Rate law 2: Haldane

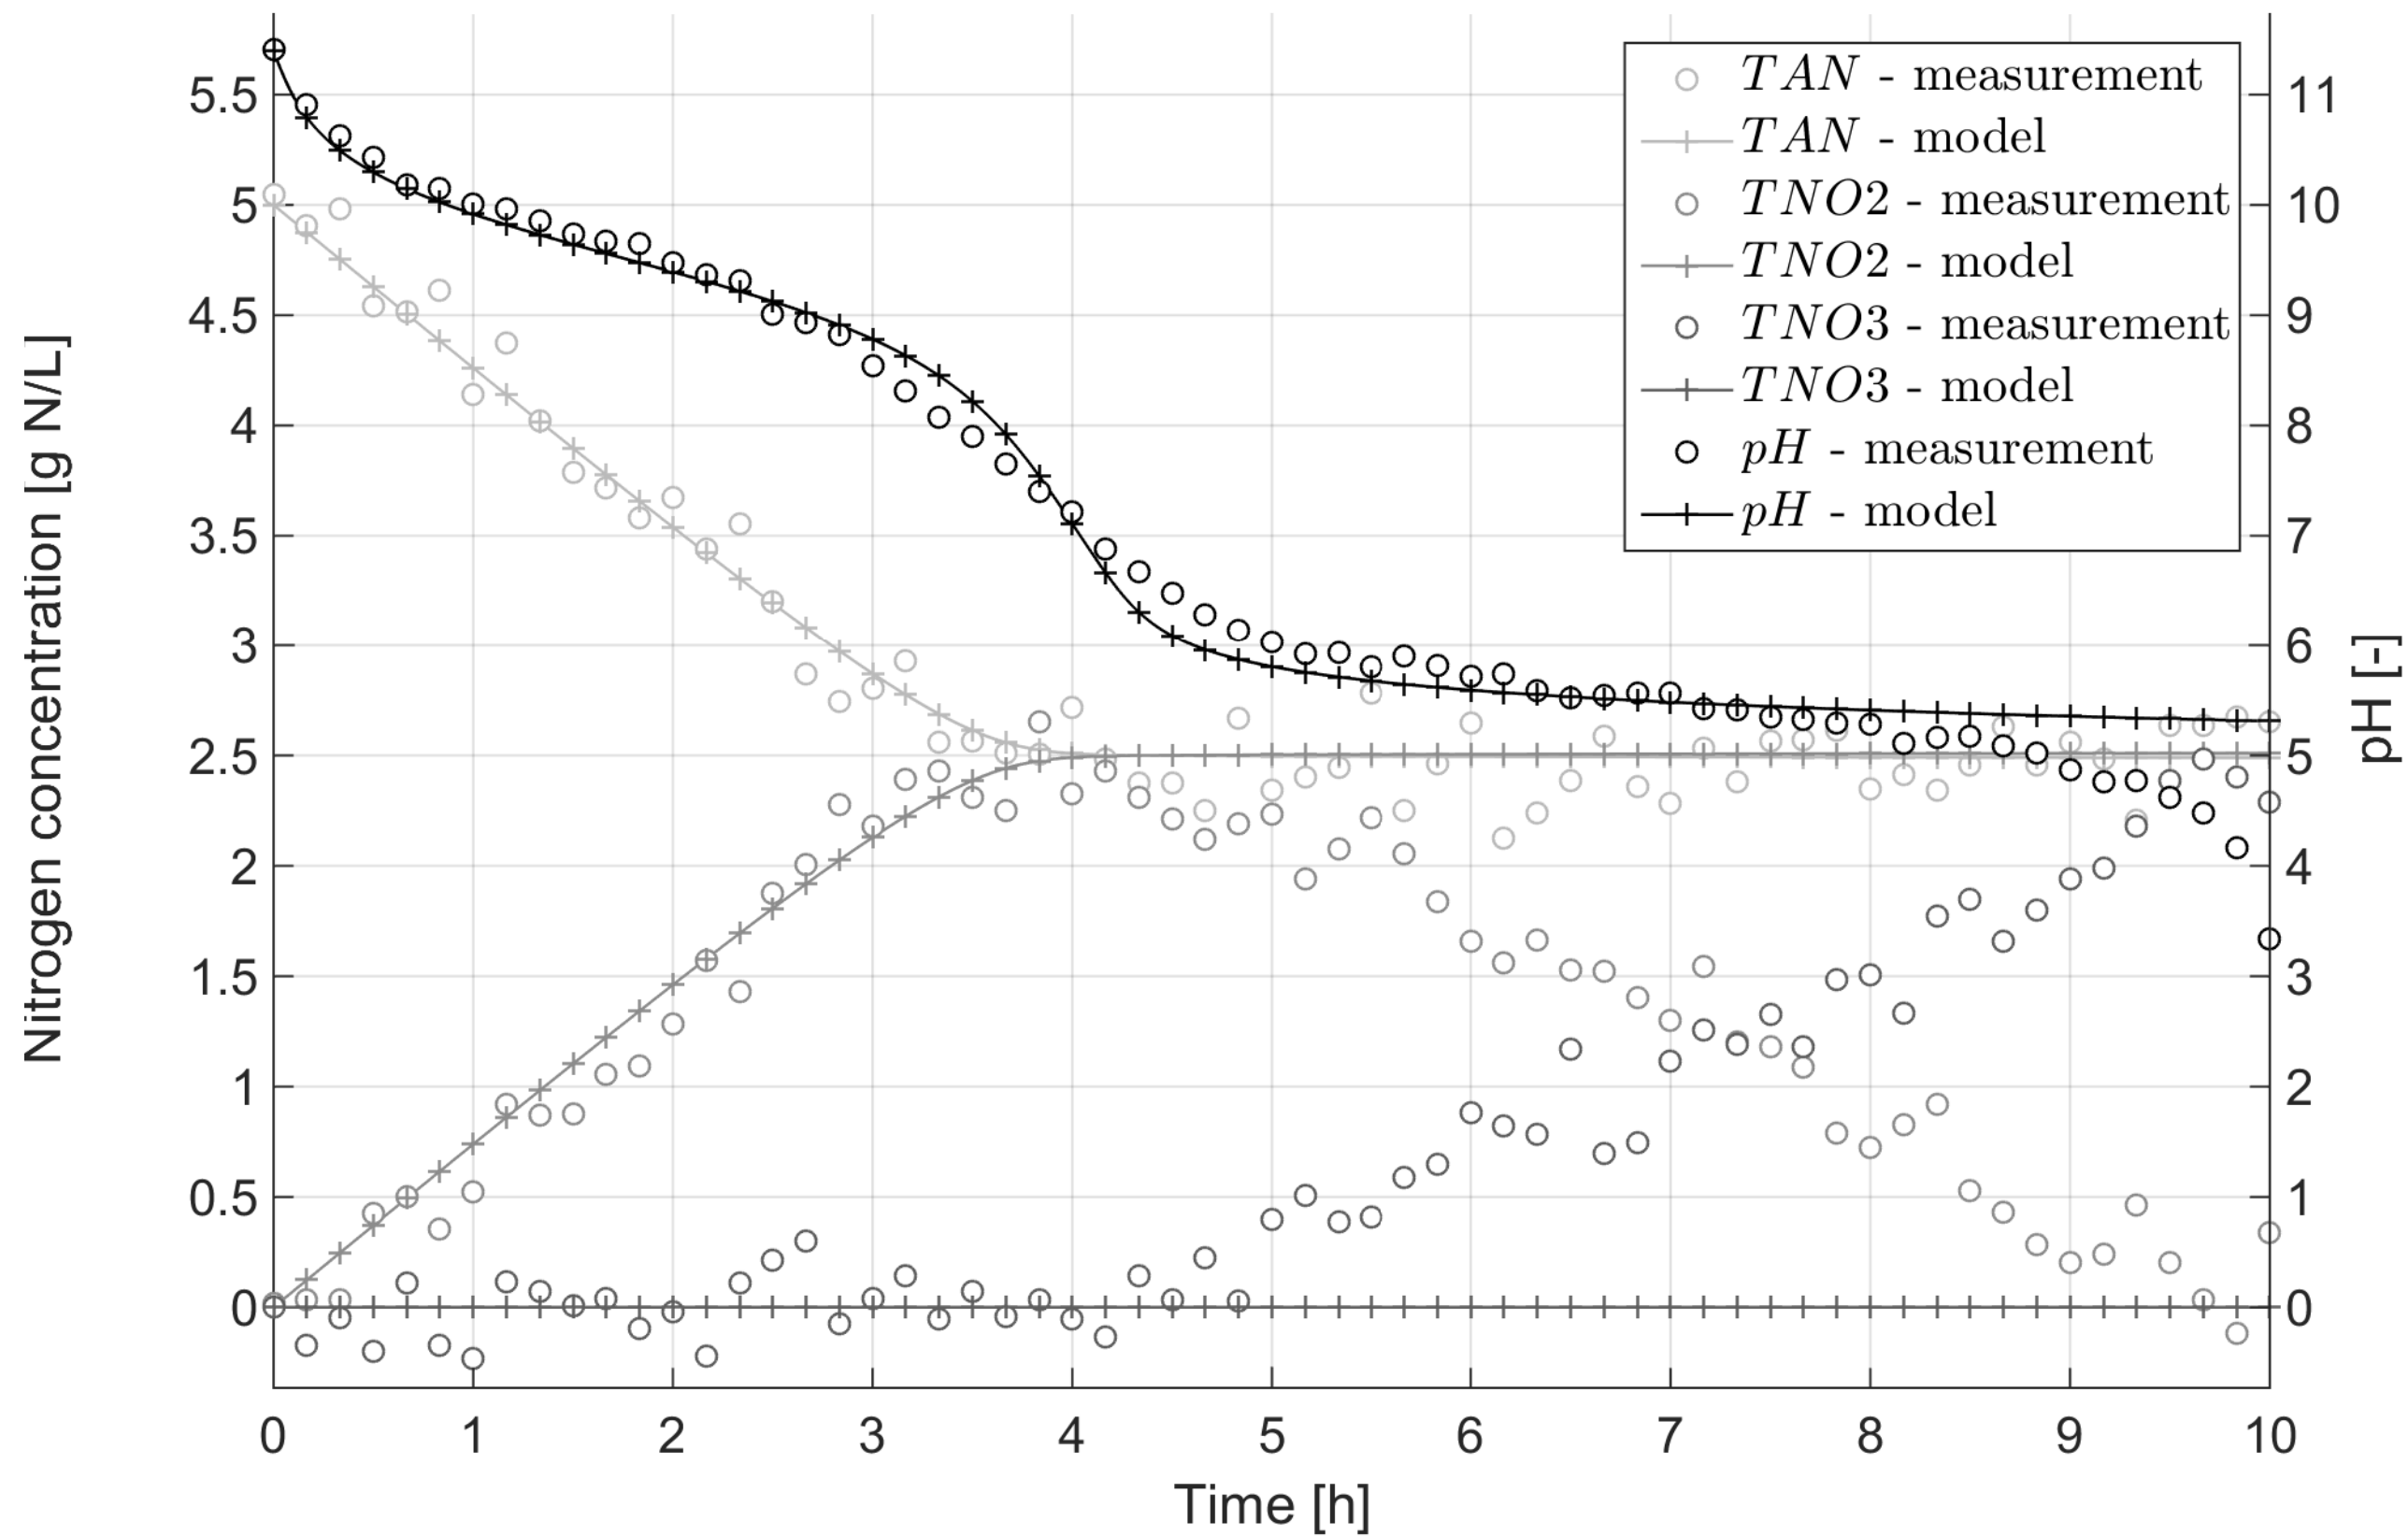

Supplement: s1 [file s1]

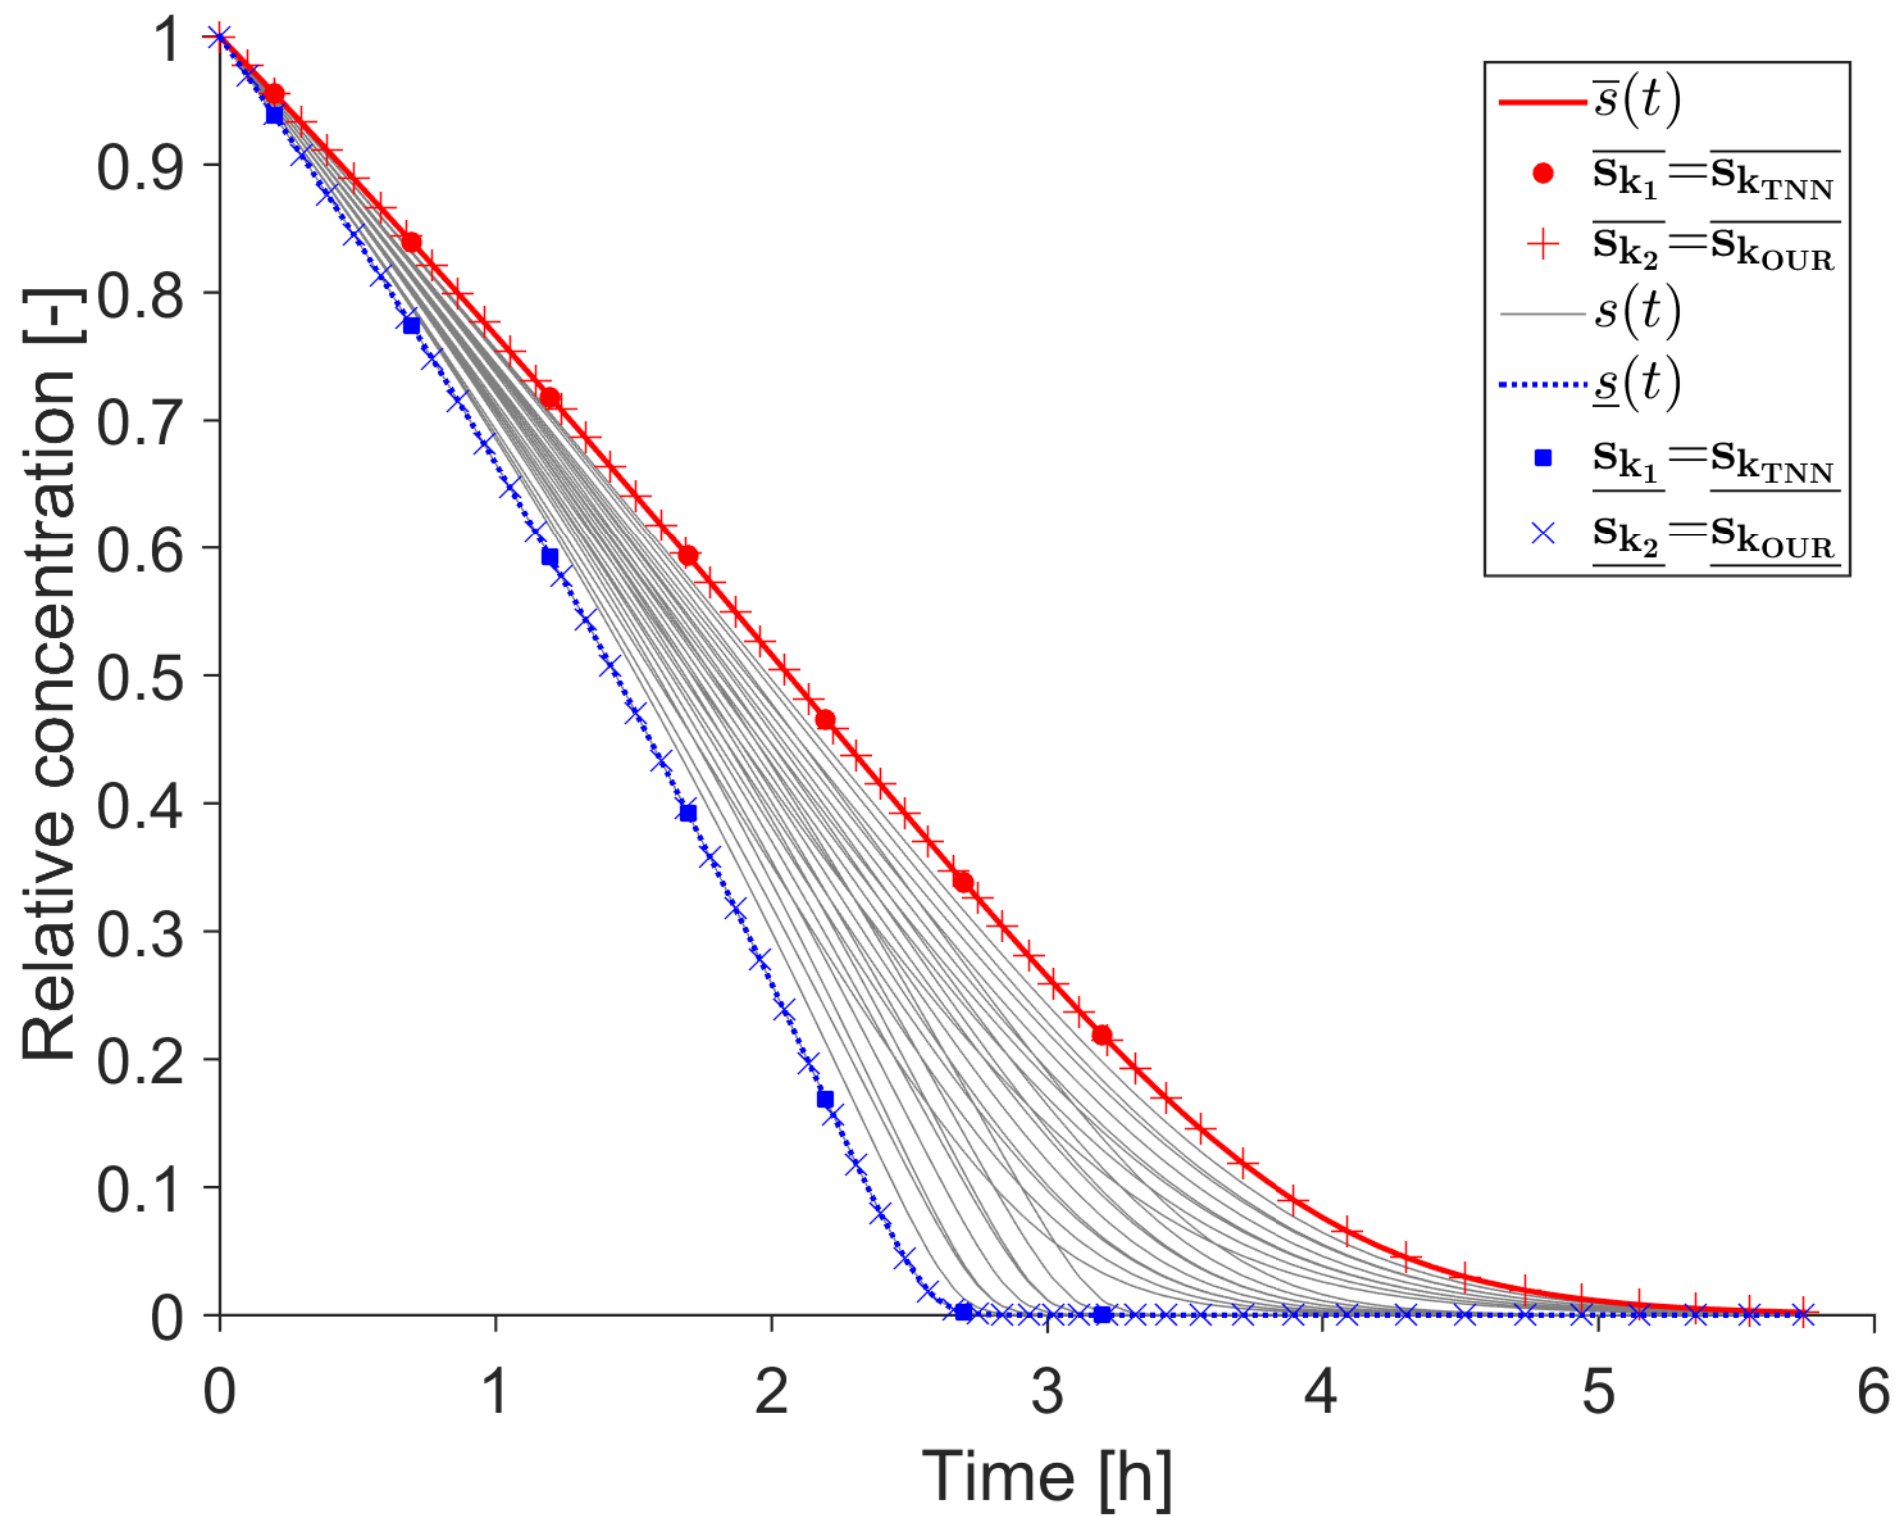

Supplement: s1 [file s1]

Rate law 1: Haldane  
Rate law 2: Zero-Order

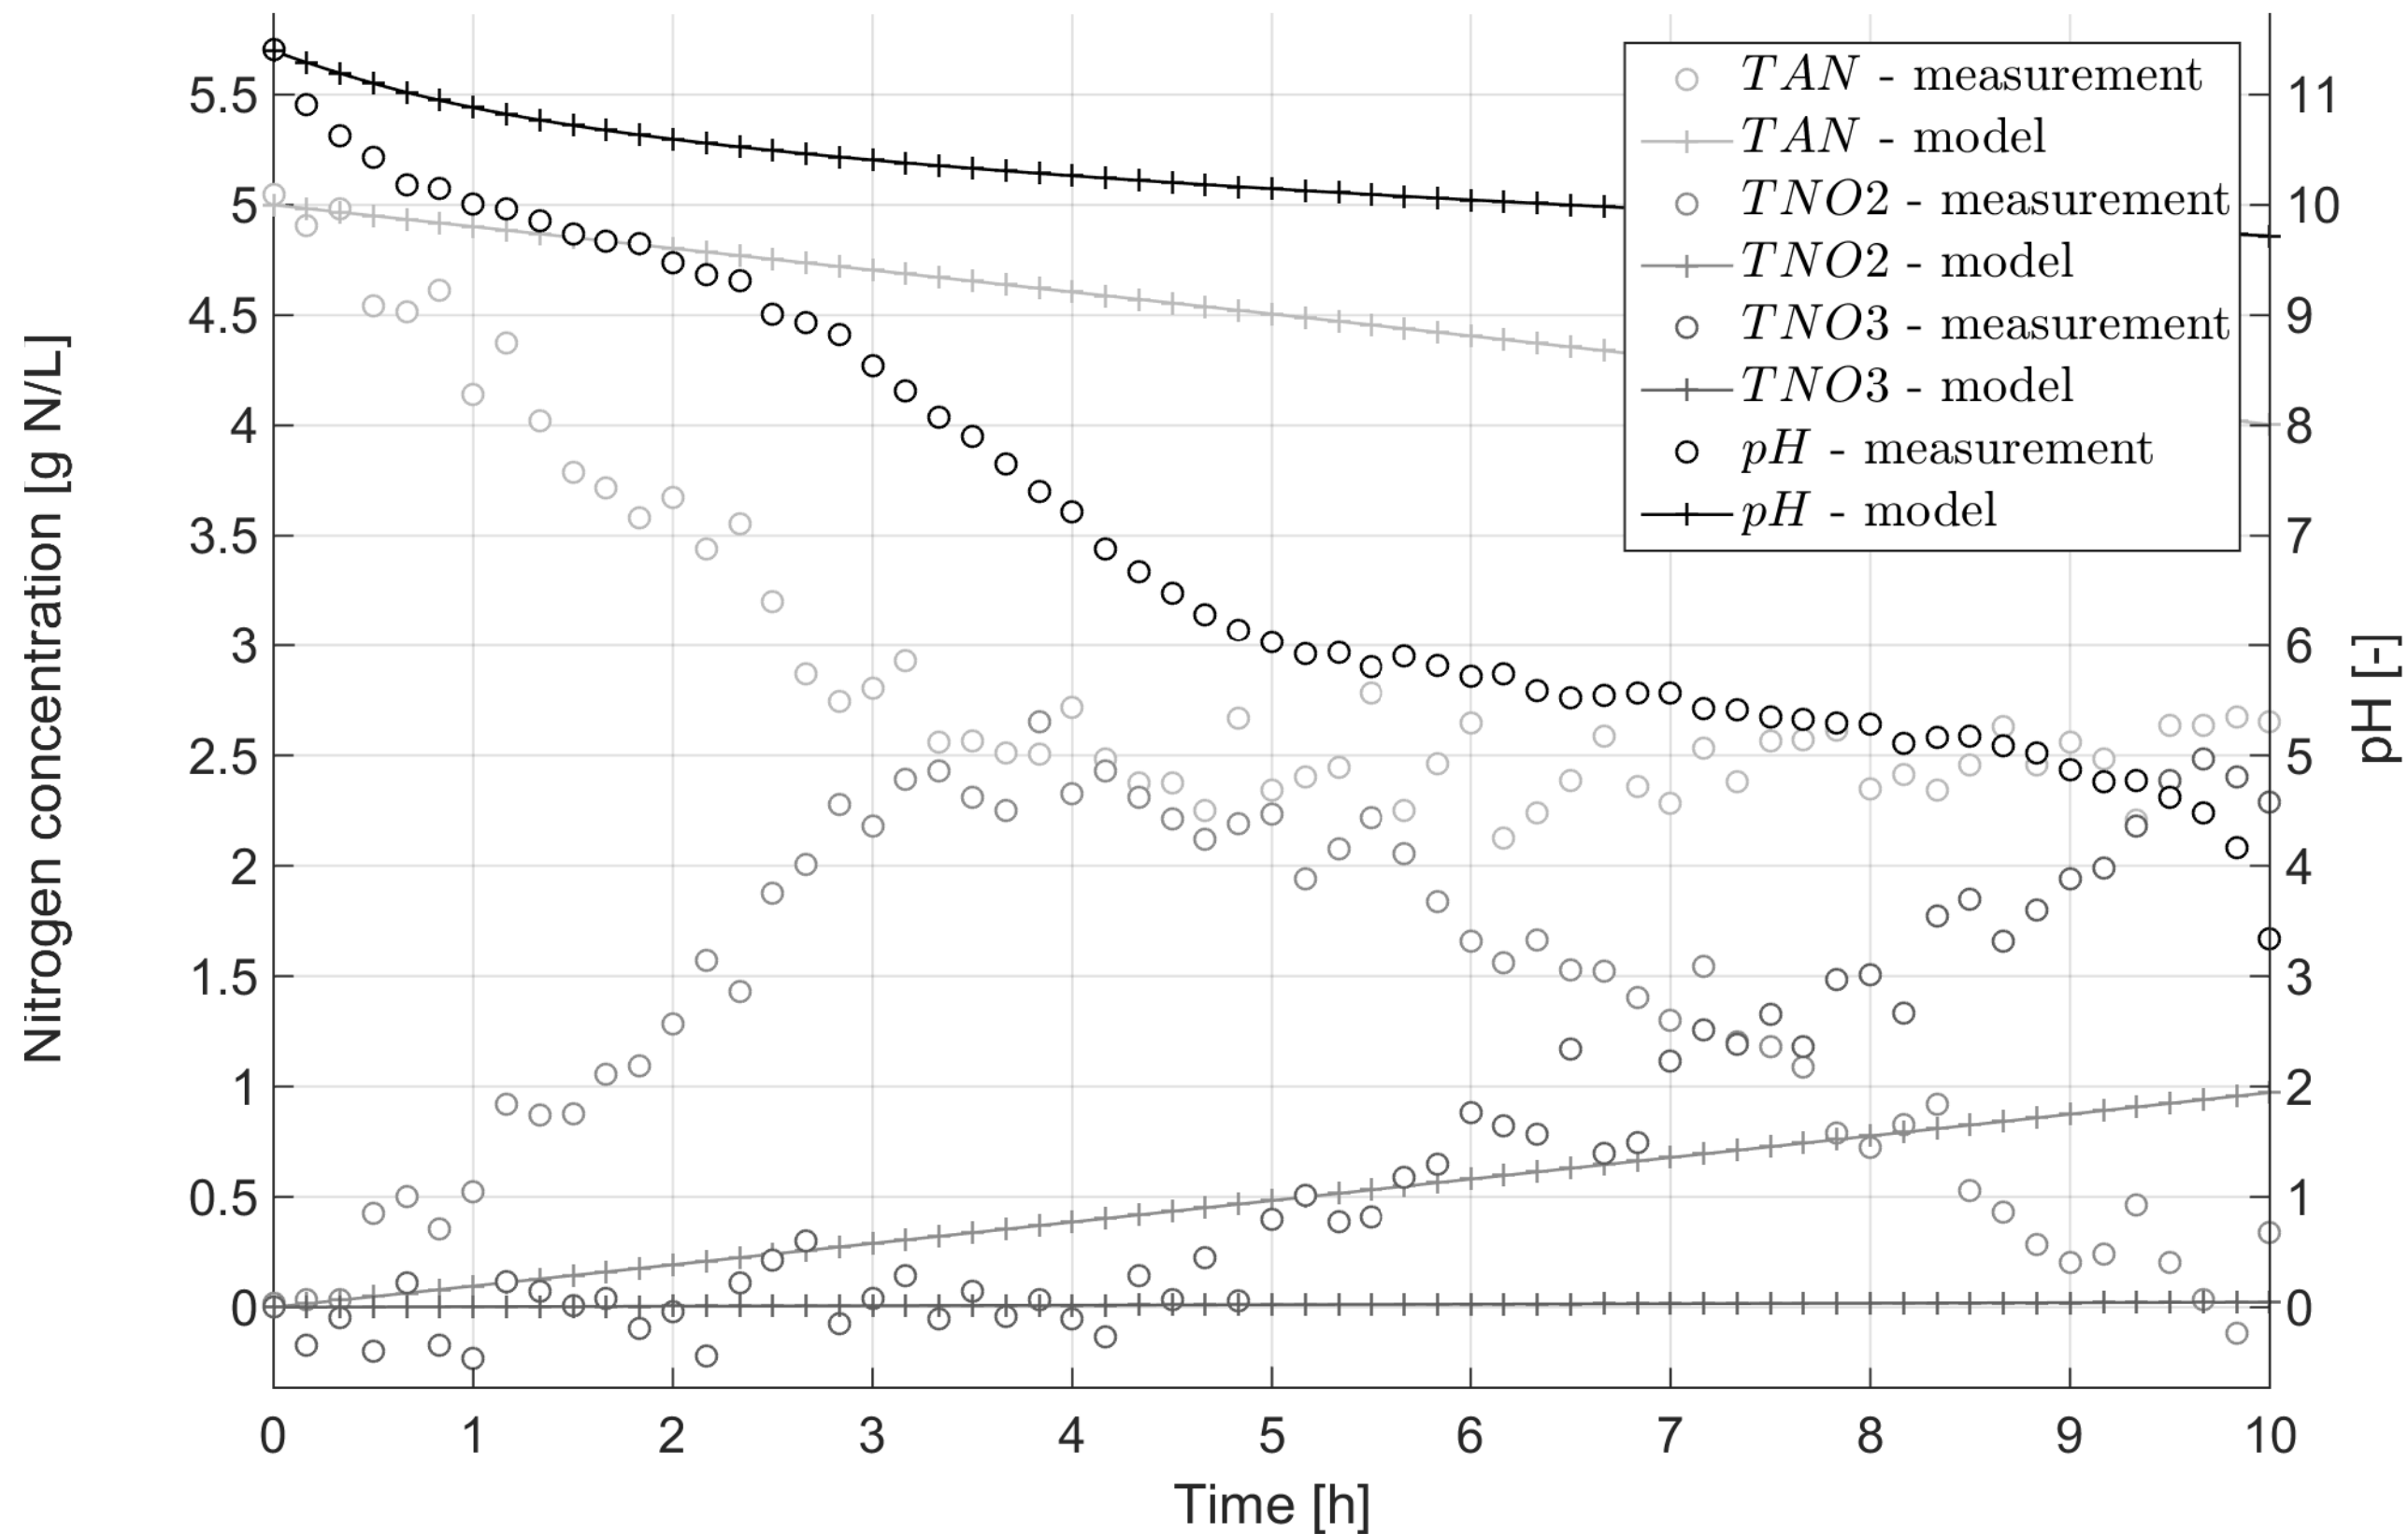

Supplement: s1 [file s1]

Rate law 1: Tessier

Rate law 2: Monod

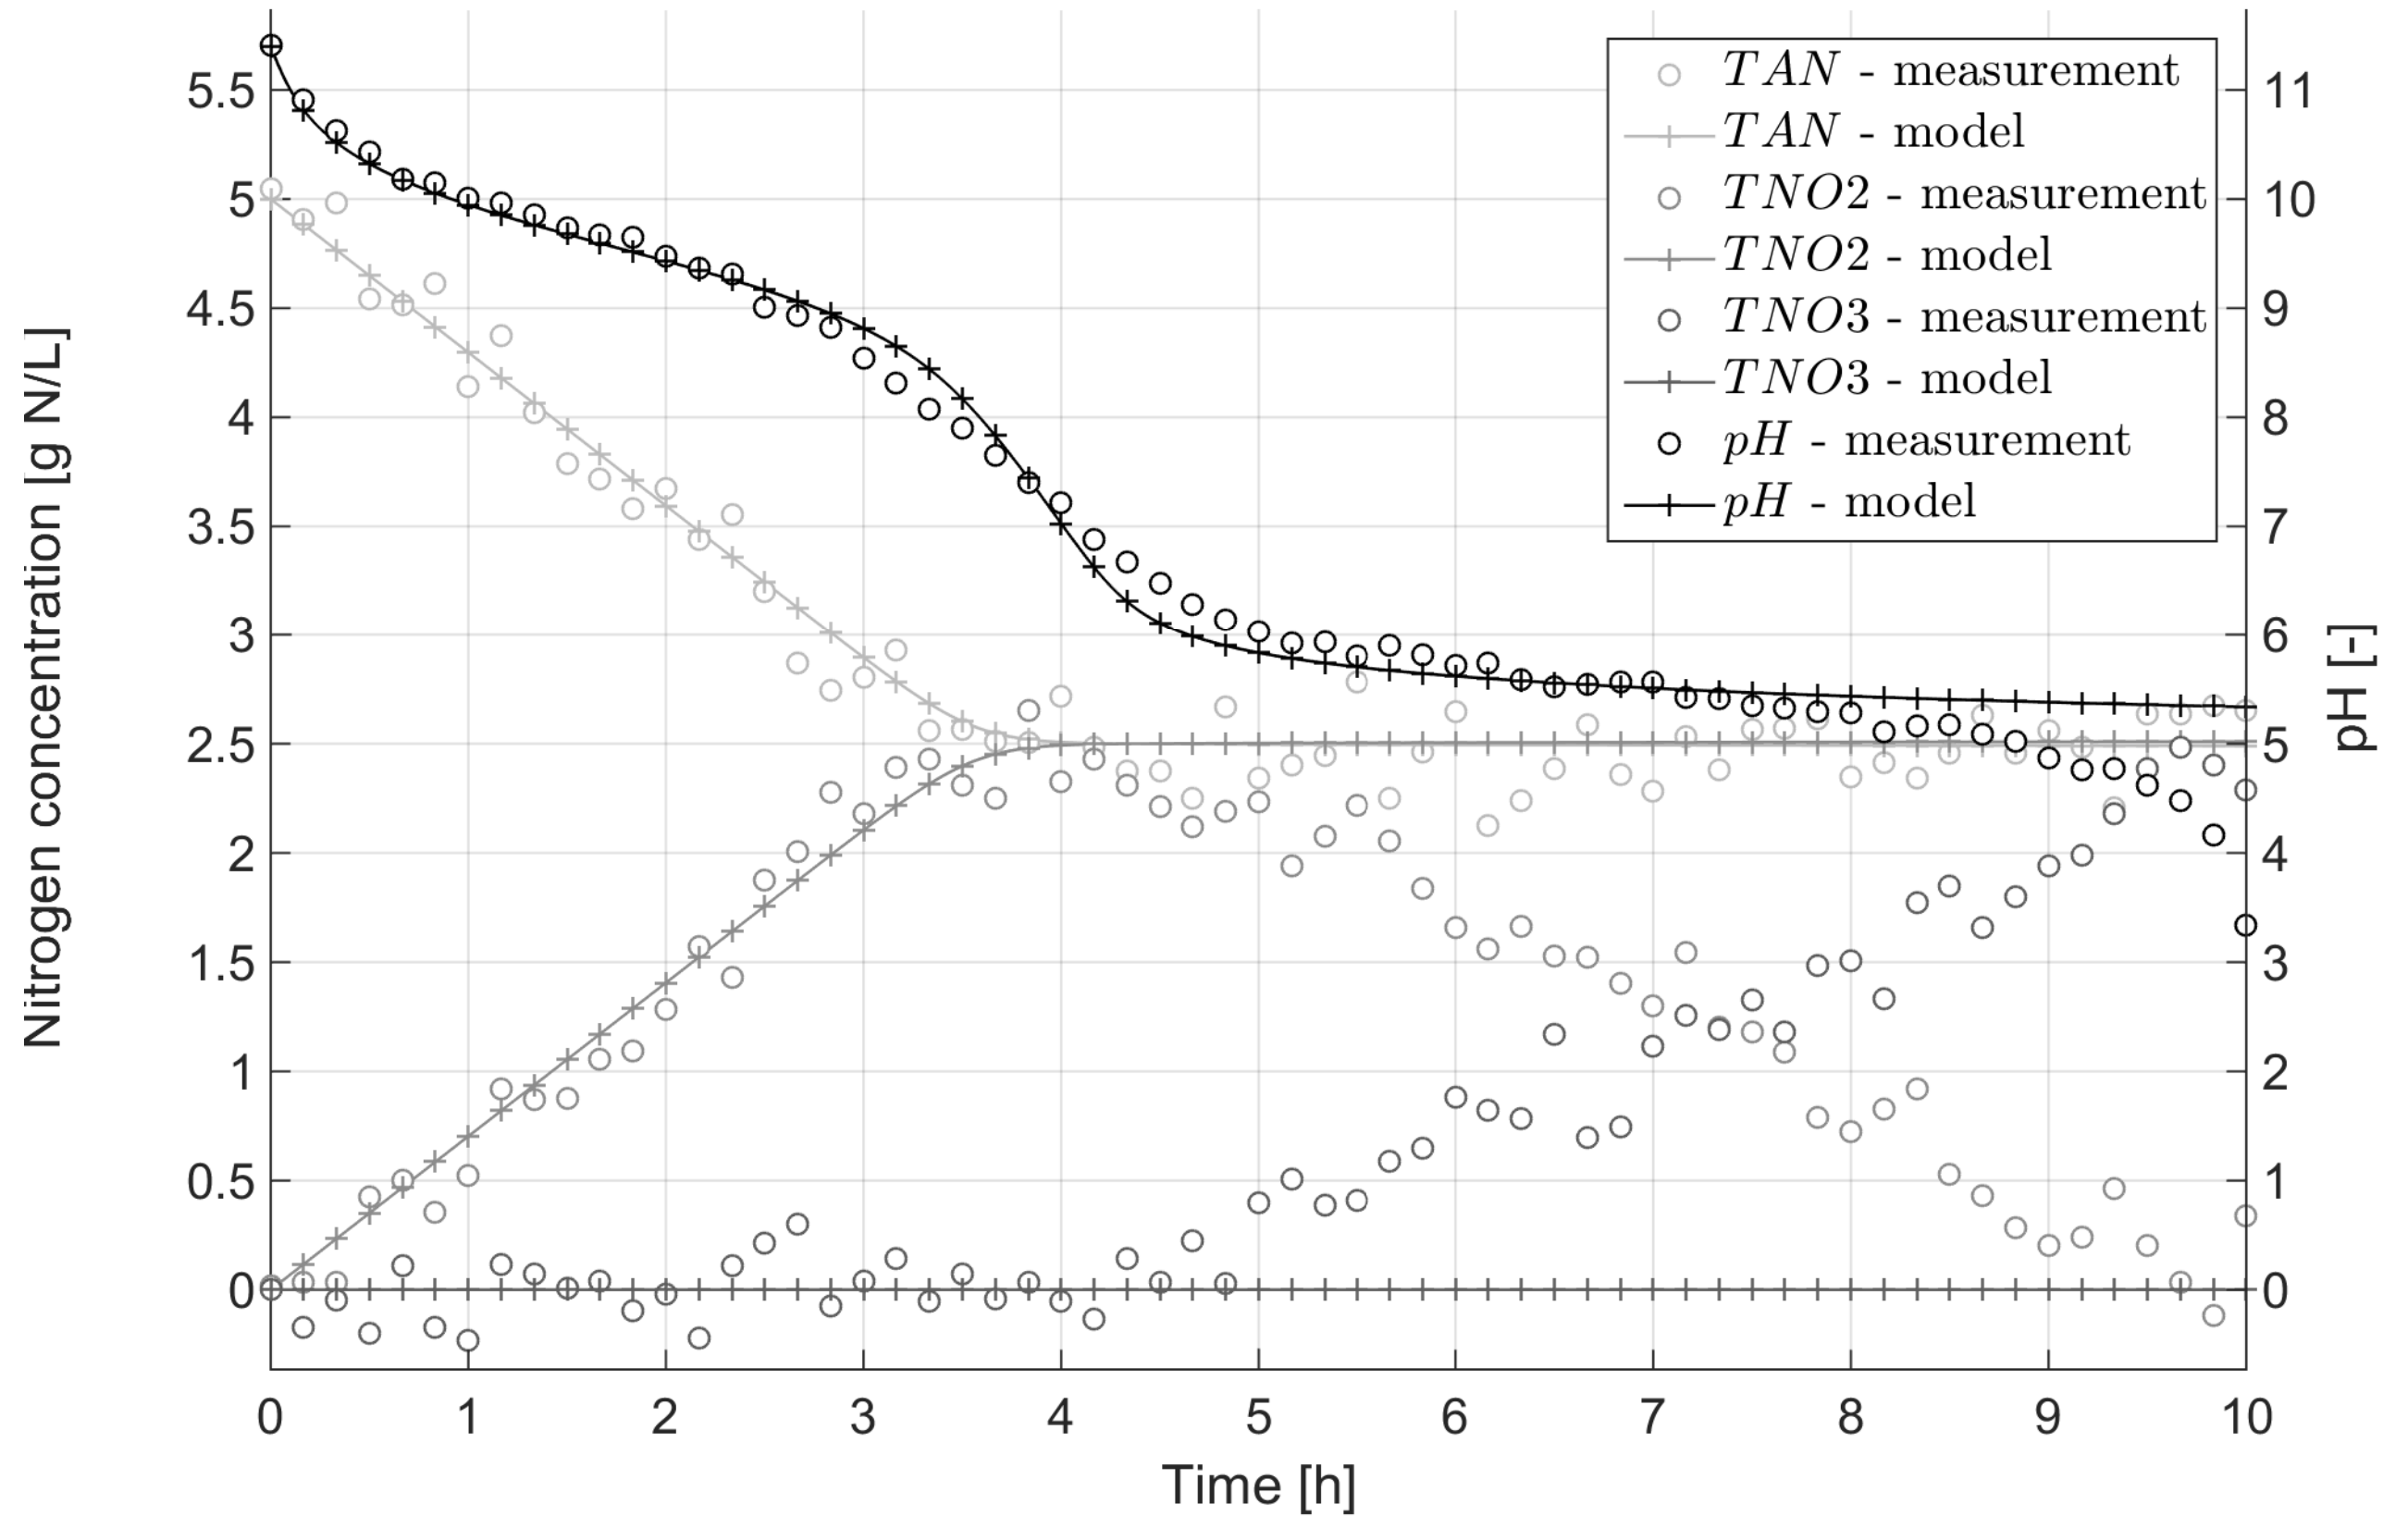

Supplement: s1 [file s1]

Rate law 1: Monod  
Rate law 2: Haldane

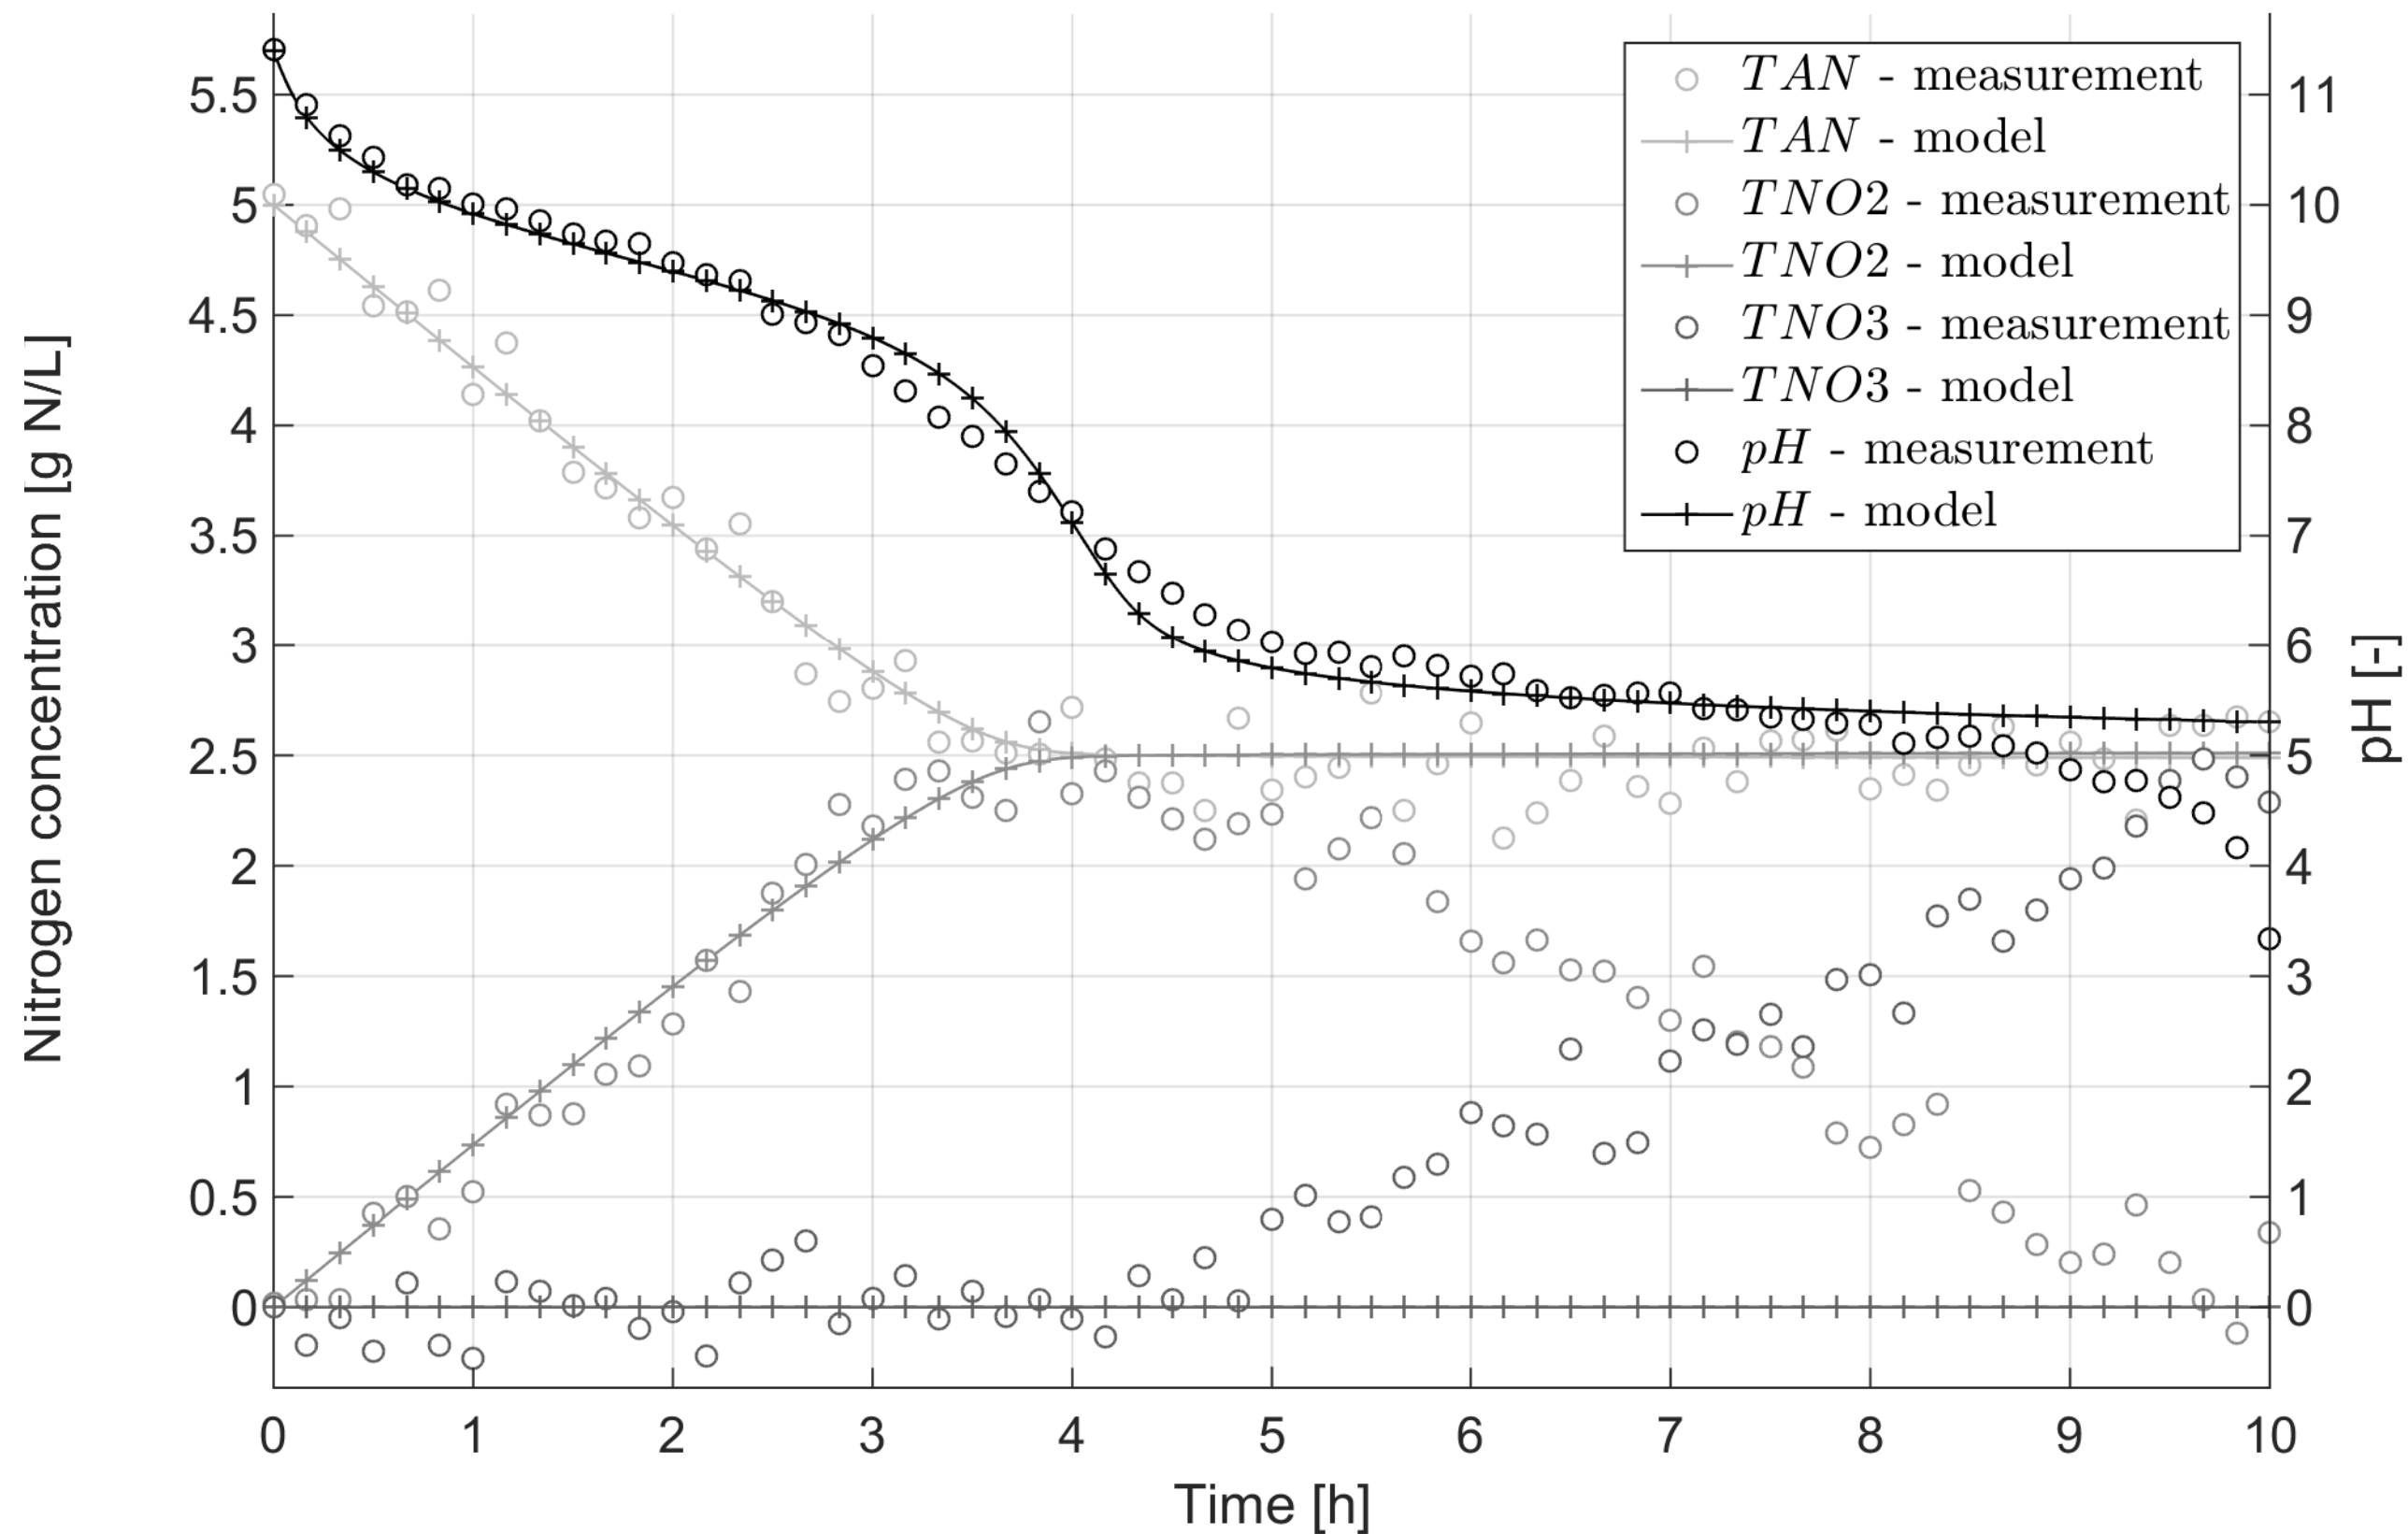

Supplement: s1 [file s1]

Rate law 1: Zero-Order  
Rate law 2: Haldane

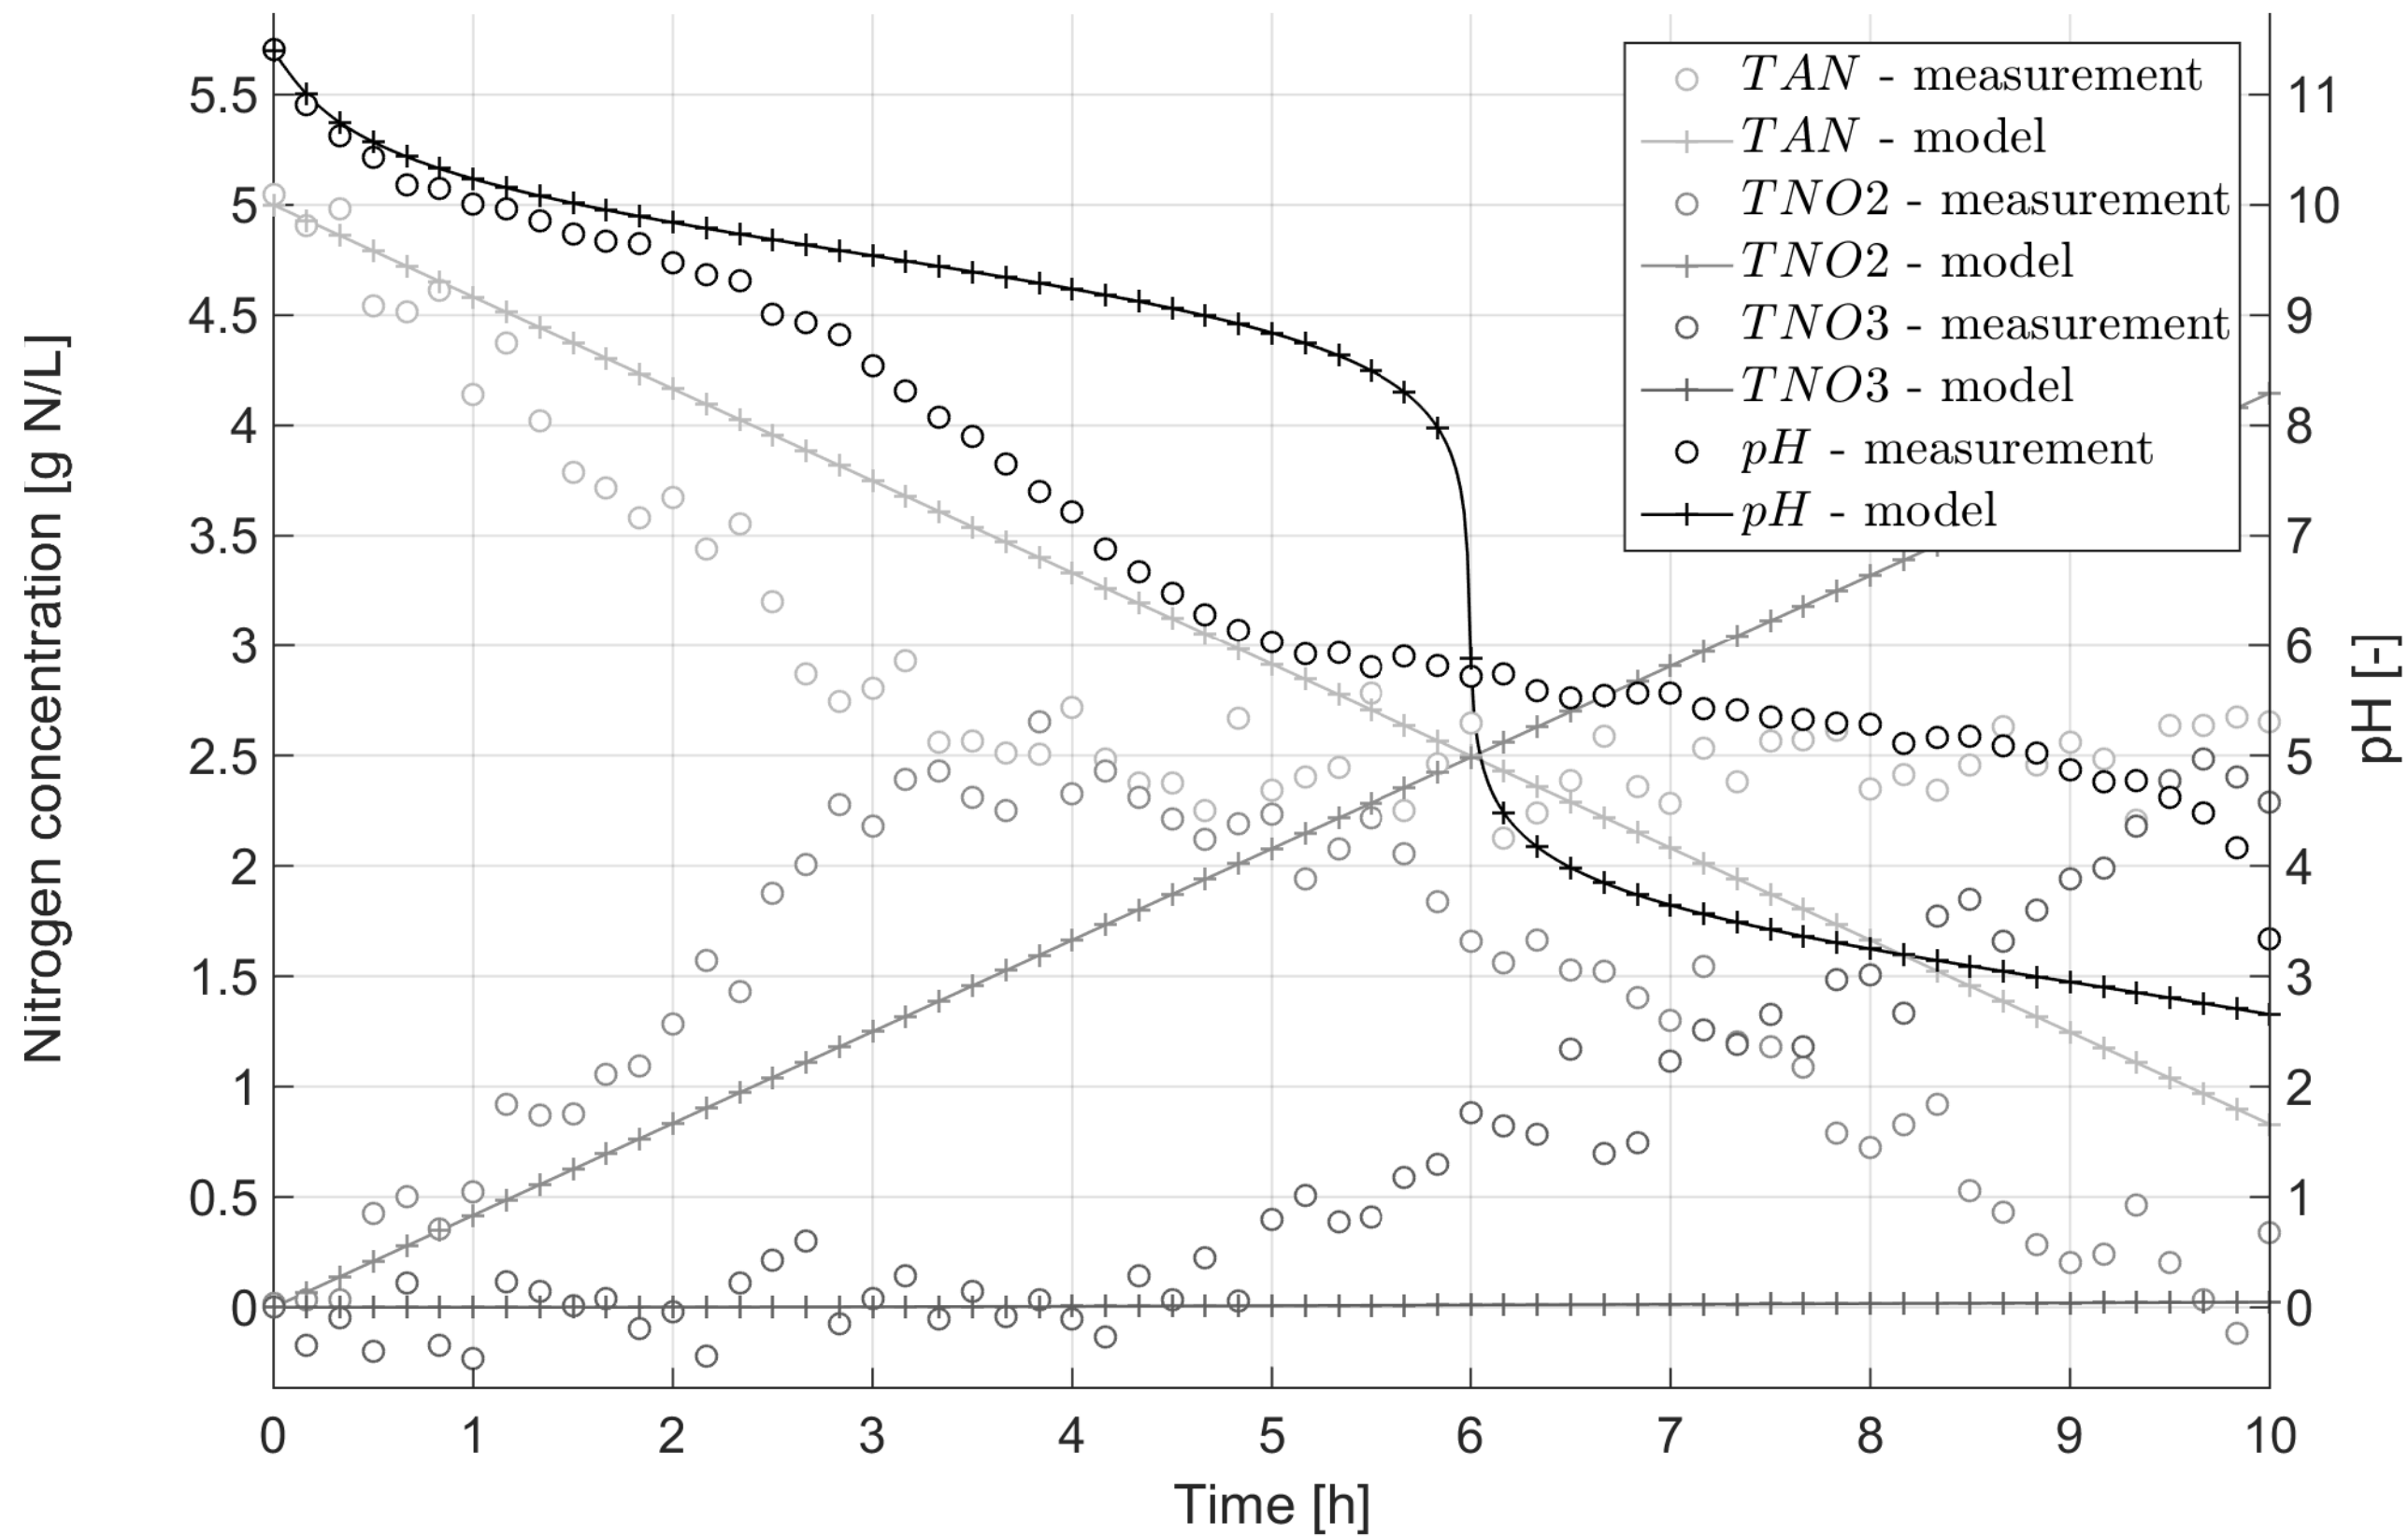

Supplement: s1 [file s1]
